# Supplementary material for: Expression of most retrotransposons in human blood correlates with biological aging
Source: eLife. 2024 Oct 17;13:RP96575. doi: 10.7554/eLife.96575 (PMC11486490; doi:10.7554/eLife.96575)
Supplement: Supplementary file 1. [file elife-96575-supp1.xlsx]

## Sheet: Sheet1
Data Source	Accession	Sample Type	Primary Ancestry	Doner Description	Age (mean)	Age (range)	Expression		Methylation
							Assay	n	Assay	n
Grady Trauma Project (GTP)	GSE58137	Whole blood	African American	Trauma-exposed populations of low socioeconomic status	42.5	15.95-77.85	Illumina HumanHT-12 V4	359	-	-
Genetics, Arthrosis and Progression study (GARP)	GSE48556	Peripheral Blood Mononuclear Cells	European	Siblings with primary osteoarthritis	60.1	43-79	Illumina HumanHT-12 V3	139	-	-
Multi-Ethnic Study of Atherosclerosis (MESA)	GSE56045 (expression), GSE56046 (methylation)	Peripheral monocytes	Caucasian, African American, Hispanic, Asian	Asymptomatic men and women	70.2	44-83	Illumina HumanHT-12 V4	1202	Illumina Infinium 450k	1202
Swedish Adoption/Twin Study of Aging (SATSA)	E-MTAB-7309	Whole blood	European	Monozygotic and dizygotic twins and the families	73	48.03-98.56	-	-	Illumina Infinium 450k	1072
Brisbane Systems Genetics Study (BSGS)	GSE56105	Whole blood	European, Australian	Monozygotic and dizygotic twins and the families	21.31	1975-10-01	-	-	Illumina Infinium 450k	614
Genome-wide Methylation Profiles Reveal Quantitative Views of Human Aging Rates (GMPWAR)	GSE40279	Whole blood	Caucasian, Hispanic	Healthy individuals	64.04	19-101	-	-	Illumina Infinium 450k	656
