# Supplementary material for: Expression of most retrotransposons in human blood correlates with biological aging
Source: eLife. 2024 Oct 17;13:RP96575. doi: 10.7554/eLife.96575 (PMC11486490; doi:10.7554/eLife.96575)
Supplement: Supplementary file 2. [file elife-96575-supp2.xlsx]

## Sheet: Sheet1
Class	GARP	MESA	GTP	Illumina HumanHT-12 V4
LINE	61	79	23	79
LTR	78	96	33	96
SINE	37	57	24	57
