# Supplementary material for: Expression of most retrotransposons in human blood correlates with biological aging
Source: eLife. 2024 Oct 17;13:RP96575. doi: 10.7554/eLife.96575 (PMC11486490; doi:10.7554/eLife.96575)
Supplement: Supplementary file 3. [file elife-96575-supp3.xlsx]

## Sheet: Sheet1
Family	GARP	MESA	GTP	Illumina HumanHT-12 V4
Alu	23	39	15	39
ERV1	30	34	9	34
ERVK	4	5	2	5
ERVL	19	31	8	31
ERVL-MaLR	23	24	14	24
L1	40	48	14	48
L2	17	25	9	25
MIR	14	18	9	18
