# Supplementary material for: Expression of most retrotransposons in human blood correlates with biological aging
Source: eLife. 2024 Oct 17;13:RP96575. doi: 10.7554/eLife.96575 (PMC11486490; doi:10.7554/eLife.96575)
Supplement: Supplementary file 4. [file elife-96575-supp4.xlsx]

## Sheet: Sheet1
Probe ID	Class	Family	SubFamily	hg19 probe coordinates
ILMN_1705326	LINE	L2	L2a	chr2|+|243064607-243064656|LOC728323|ncRNA_splicing,chr5|+|180760913-180760962|LOC100132287(dist=5717),OR4F29(dist=33326)|intergenic,chr1|+|334298-334347|LOC100133331(dist=5717),OR4F29(dist=33312)|intergenic,chr3|+|197955234-197955283|FAM157A(dist=47506),NONE(dist=NONE)|intergenic,chr16|+|90244294-90244343|PRDM7(dist=101956),NONE(dist=NONE)|intergenic,chr4|+|119562000-119562049|CEP170P1(dist=8664…
ILMN_3247765	LINE	L2	L2c	chr2|+|114344425-114344474|WASH2P|ncRNA_intronic,chr15|+|102504570-102504619|WASH3P|ncRNA_intronic,chr12|+|77087-77136|NONE(dist=NONE),LOC100288778(dist=10848)|intergenic,chr9|-|26657-26706|WASH1|intronic,chr1|-|26544-26593|WASH7P|ncRNA_intronic,chr19|-|68152-68201|WASH5P|ncRNA_intronic,,,,,,,,,,,,,,,,,,,,,,,,,,,,,,,,,,,,,,,,,,,,,,,,,
ILMN_1723732	LTR	ERVL-MaLR	MLT1J2	chr15|+|102496548-102496597|FAM138E|ncRNA_exonic,chr12|-|147907-147956|FAM138D|ncRNA_exonic,chr9|-|34355-34404|FAM138C|ncRNA_exonic,chr1|-|34572-34621|FAM138A,FAM138F|ncRNA_exonic,chr19|-|76181-76230|FAM138A,FAM138F|ncRNA_exonic,chr12|+|69071-69120|NONE(dist=NONE),LOC100288778(dist=18864)|intergenic,chr2|+|114336419-114336468|FAM138B|ncRNA_exonic,,,,,,,,,,,,,,,,,,,,,,,,,,,,,,,,,,,,,,,,,,,,,,,,
ILMN_3241335	LTR	ERV1	MER4A	chr1|-|461631-461680|OR4F29(dist=93034),OR4F3(dist=159416)|intergenic,chr17|-|81176641-81176690|FLJ43681|ncRNA_intronic,chr2|-|243101987-243102036|LOC728323|ncRNA_intronic,chr5|-|180889688-180889737|OR4F29(dist=94462),NONE(dist=NONE)|intergenic,chr6|-|171045316-171045365|PDCD2(dist=151536),NONE(dist=NONE)|intergenic,chr16|-|90281582-90281631|PRDM7(dist=139244),NONE(dist=NONE)|intergenic,chr1|+|91…
ILMN_3235006	SINE	Alu	AluSz	chr6|-|139011-139060|NONE(dist=NONE),DUSP22(dist=153041)|intergenic,chr1|-|654223-654272|OR4F3(dist=32189),LOC100133331(dist=6867)|intergenic,chr19|-|189997-190046|OR4F17(dist=78401),FLJ45445(dist=6970)|intergenic,chrUn_gl000227|-|64878-64927|NONE(dist=NONE),NONE(dist=NONE)|intergenic,chr1|-|127866-127915|OR4F5(dist=57858),LOC729737(dist=8783)|intergenic,chrY|-|27531861-27531910|TTTY17C(dist=2009…
ILMN_3249415	SINE	Alu	AluJo	chr11|-|135688-135737|LOC100133161(dist=3768),LOC653486(dist=57343)|intergenic,chr1|-|676307-676356|LOC100133331(dist=10576),LOC100288069(dist=23889)|intergenic,chr1|-|140588-140637|LOC729737|upstream,chr3|+|197940991-197941040|FAM157A(dist=33263),NONE(dist=NONE)|intergenic,chr16|+|90228215-90228264|PRDM7(dist=85877),NONE(dist=NONE)|intergenic,chr1|+|320091-320140|LOC729737(dist=179525),LOC100133…
ILMN_3249496	SINE	Alu	AluJo	chr3|+|197940903-197940952|FAM157A(dist=33175),NONE(dist=NONE)|intergenic,chr1|-|224146613-224146662|TP53BP2(dist=112939),FBXO28(dist=155129)|intergenic,chr1|-|140676-140725|LOC729737|upstream,chr1|-|676395-676444|LOC100133331(dist=10664),LOC100288069(dist=23801)|intergenic,chr19|-|206056-206105|FLJ45445(dist=3847),PPAP2C(dist=74939)|intergenic,chr11|-|135776-135825|LOC100133161(dist=3856),LOC653…
ILMN_3210217	SINE	Alu	AluJb	chr1|-|679978-680027|LOC100133331(dist=14247),LOC100288069(dist=20218)|intergenic,chr11|-|139359-139408|LOC100133161(dist=7439),LOC653486(dist=53672)|intergenic,chr19|-|209639-209688|FLJ45445(dist=7430),PPAP2C(dist=71356)|intergenic,chr1|-|144259-144308|LOC729737(dist=3693),LOC100133331(dist=179584)|intergenic,chr5|+|180743035-180743084|TRIM52(dist=54916),LOC100132287(dist=7423)|intergenic,chr3|+…
ILMN_3249449	SINE	Alu	AluJb	chr5|+|180742946-180742995|TRIM52(dist=54827),LOC100132287(dist=7512)|intergenic,chr1|-|222663424-222663473|DUSP10(dist=747908),HHIPL2(dist=32129)|intergenic,chr11|-|139448-139497|LOC100133161(dist=7528),LOC653486(dist=53583)|intergenic,chr19|-|209728-209777|FLJ45445(dist=7519),PPAP2C(dist=71267)|intergenic,chr1|-|144348-144397|LOC729737(dist=3782),LOC100133331(dist=179495)|intergenic,chr1|-|6800…
ILMN_1729660	SINE	Alu	AluJb	chr1|-|243222018-243222067|LOC731275|ncRNA_intronic,chr1|-|670038-670087|LOC100133331(dist=4307),LOC100288069(dist=30158)|intergenic,chr1|-|666630-666679|LOC100133331|upstream,chr19|-|203108-203157|FLJ45445|upstream,chr11|-|132819-132868|LOC100133161|upstream,chr1|-|673445-673494|LOC100133331(dist=7714),LOC100288069(dist=26751)|intergenic,chr1|-|222651941-222651990|DUSP10(dist=736425),HHIPL2(dist…
ILMN_3242833	SINE	Alu	AluJr	chr1|-|669660-669709|LOC100133331(dist=3929),LOC100288069(dist=30536)|intergenic,chr7|-|51461494-51461543|COBL(dist=76979),POM121L12(dist=1641806)|intergenic,chr11|-|132441-132490|LOC100133161|upstream,chr1|-|243221640-243221689|LOC731275|ncRNA_intronic,chr1|-|224141039-224141088|TP53BP2(dist=107365),FBXO28(dist=160703)|intergenic,chr1|-|673067-673116|LOC100133331(dist=7336),LOC100288069(dist=271…
ILMN_3235061	LTR	ERVL	LTR41	chr16|+|90231751-90231800|PRDM7(dist=89413),NONE(dist=NONE)|intergenic,chr1|-|665959-666008|LOC100133331|upstream,chr19|-|202437-202486|FLJ45445|upstream,chr3|+|197944522-197944571|FAM157A(dist=36794),NONE(dist=NONE)|intergenic,chr1|+|323615-323664|LOC100132062,LOC100132287,LOC100133331|upstream,chr5|+|180750230-180750279|LOC100132062,LOC100132287,LOC100133331|upstream,,,,,,,,,,,,,,,,,,,,,,,,,,,,…
ILMN_1686847	SINE	Alu	AluJr4	chr1|-|548193-548242|OR4F29(dist=179596),OR4F3(dist=72854)|intergenic,chr8|-|46658-46707|NONE(dist=NONE),OR4F21(dist=69379)|intergenic,chr5|+|180862919-180862968|OR4F29(dist=67693),NONE(dist=NONE)|intergenic,chr1|+|436365-436414|OR4F29(dist=67768),OR4F3(dist=184682)|intergenic,chr6|+|171020601-171020650|PDCD2(dist=126821),NONE(dist=NONE)|intergenic,,,,,,,,,,,,,,,,,,,,,,,,,,,,,,,,,,,,,,,,,,,,,,,,,,
ILMN_1729660	SINE	Alu	AluJr	chr1|-|243222018-243222067|LOC731275|ncRNA_intronic,chr1|-|670038-670087|LOC100133331(dist=4307),LOC100288069(dist=30158)|intergenic,chr1|-|666630-666679|LOC100133331|upstream,chr19|-|203108-203157|FLJ45445|upstream,chr11|-|132819-132868|LOC100133161|upstream,chr1|-|673445-673494|LOC100133331(dist=7714),LOC100288069(dist=26751)|intergenic,chr1|-|222651941-222651990|DUSP10(dist=736425),HHIPL2(dist…
ILMN_1854472	SINE	MIR	MIRb	chr1|-|12937514-12937563|PRAMEF2(dist=15750),PRAMEF4(dist=1470)|intergenic,chr1|-|12882946-12882995|PRAMEF1(dist=26169),PRAMEF11(dist=1473)|intergenic,,,,,,,,,,,,,,,,,,,,,,,,,,,,,,,,,,,,,,,,,,,,,,,,,,,,,
ILMN_1755526	LTR	ERV1	HERV3-int	chr1|+|13155664-13155713|PRAMEF5(dist=37913),LOC440563(dist=27247)|intergenic,chr1|-|13205989-13206038|LOC440563(dist=21663),PRAMEF3(dist=122158)|intergenic,,,,,,,,,,,,,,,,,,,,,,,,,,,,,,,,,,,,,,,,,,,,,,,,,,,,,
ILMN_1731838	LTR	ERVL	HERVL-int	chr6_ssto_hap7|+|2732748-2732797|NONE(dist=NONE),NONE(dist=NONE)|intergenic,chr4|-|60409897-60409946|NONE(dist=NONE),LPHN3(dist=1952893)|intergenic,chrX|-|98109075-98109124|DIAPH2(dist=1253478),LOC442459(dist=607476)|intergenic,chr14|-|70901696-70901745|SYNJ2BP-COX16(dist=17889),ADAM21(dist=17129)|intergenic,chr14|-|57798504-57798553|MUDENG(dist=41707),NAA30(dist=58718)|intergenic,chr14|-|7029263…
ILMN_1704065	SINE	MIR	MIR3	chr1|+|108975691-108975740|NBPF4(dist=188988),NBPF6(dist=17164)|intergenic,chr1|-|108803884-108803933|NBPF4(dist=17181),NBPF6(dist=188971)|intergenic,,,,,,,,,,,,,,,,,,,,,,,,,,,,,,,,,,,,,,,,,,,,,,,,,,,,,
ILMN_1678208	LINE	L1	L1M1	chr1|-|108851128-108851177|NBPF4(dist=64425),NBPF6(dist=141727)|intergenic,chr1|+|108928446-108928495|NBPF4(dist=141743),NBPF6(dist=64409)|intergenic,,,,,,,,,,,,,,,,,,,,,,,,,,,,,,,,,,,,,,,,,,,,,,,,,,,,,
ILMN_1701857	LTR	ERVL	LTR16A	chr1|+|142921836-142921885|NONE(dist=NONE),LOC100130000(dist=765245)|intergenic,chr1|-|142588113-142588162|NONE(dist=NONE),LOC100130000(dist=1098968)|intergenic,chr21|-|10133107-10133156|TEKT4P2(dist=164514),TPTE(dist=773587)|intergenic,chrUn_gl000245|-|33600-33649|NONE(dist=NONE),NONE(dist=NONE)|intergenic,chrUn_gl000221|+|110721-110770|NONE(dist=NONE),NONE(dist=NONE)|intergenic,,,,,,,,,,,,,,,,,…
ILMN_1859661	LINE	L1	L1MB4	chrUn_gl000233|+|24532-24581|NONE(dist=NONE),NONE(dist=NONE)|intergenic,chr21|+|10198077-10198126|TEKT4P2(dist=229484),TPTE(dist=708617)|intergenic,chrUn_gl000243|+|3315-3364|NONE(dist=NONE),NONE(dist=NONE)|intergenic,chr1|+|142652282-142652331|NONE(dist=NONE),LOC100130000(dist=1034799)|intergenic,chr3|-|75804220-75804269|ZNF717|intronic,chrUn_gl000218|-|69518-69567|LOC100233156|ncRNA_intronic,ch…
ILMN_1779625	LINE	L2	L2c	chr1|-|142846519-142846568|NONE(dist=NONE),LOC100130000(dist=840562)|intergenic,chr1|-|143398206-143398255|NONE(dist=NONE),LOC100130000(dist=288875)|intergenic,chrUn_gl000221|-|35053-35102|NONE(dist=NONE),NONE(dist=NONE)|intergenic,chr21|+|10208739-10208788|TEKT4P2(dist=240146),TPTE(dist=697955)|intergenic,,,,,,,,,,,,,,,,,,,,,,,,,,,,,,,,,,,,,,,,,,,,,,,,,,,
ILMN_1859661	LINE	L1	L1MB2	chrUn_gl000233|+|24532-24581|NONE(dist=NONE),NONE(dist=NONE)|intergenic,chr21|+|10198077-10198126|TEKT4P2(dist=229484),TPTE(dist=708617)|intergenic,chrUn_gl000243|+|3315-3364|NONE(dist=NONE),NONE(dist=NONE)|intergenic,chr1|+|142652282-142652331|NONE(dist=NONE),LOC100130000(dist=1034799)|intergenic,chr3|-|75804220-75804269|ZNF717|intronic,chrUn_gl000218|-|69518-69567|LOC100233156|ncRNA_intronic,ch…
ILMN_1665210	LTR	ERVL-MaLR	MLT1D	chr4|-|49533382-49533431|CWH43(dist=469287),NONE(dist=NONE)|intergenic,chrUn_gl000211|-|59873-59922|FLJ43315|ncRNA_intronic,chr9|-|67921703-67921752|FAM27B(dist=127514),ANKRD20A1(dist=5009)|intergenic,chr9|-|69376932-69376981|CBWD6(dist=114339),ANKRD20A4(dist=5000)|intergenic,chr9|-|42363308-42363357|KGFLP2(dist=343724),ANKRD20A2(dist=4946)|intergenic,chr21|-|9716041-9716090|NONE(dist=NONE),MIR36…
ILMN_1665210	SINE	Alu	FLAM_C	chr4|-|49533382-49533431|CWH43(dist=469287),NONE(dist=NONE)|intergenic,chrUn_gl000211|-|59873-59922|FLJ43315|ncRNA_intronic,chr9|-|67921703-67921752|FAM27B(dist=127514),ANKRD20A1(dist=5009)|intergenic,chr9|-|69376932-69376981|CBWD6(dist=114339),ANKRD20A4(dist=5000)|intergenic,chr9|-|42363308-42363357|KGFLP2(dist=343724),ANKRD20A2(dist=4946)|intergenic,chr21|-|9716041-9716090|NONE(dist=NONE),MIR36…
ILMN_1859661	LINE	L1	L1MCa	chrUn_gl000233|+|24532-24581|NONE(dist=NONE),NONE(dist=NONE)|intergenic,chr21|+|10198077-10198126|TEKT4P2(dist=229484),TPTE(dist=708617)|intergenic,chrUn_gl000243|+|3315-3364|NONE(dist=NONE),NONE(dist=NONE)|intergenic,chr1|+|142652282-142652331|NONE(dist=NONE),LOC100130000(dist=1034799)|intergenic,chr3|-|75804220-75804269|ZNF717|intronic,chrUn_gl000218|-|69518-69567|LOC100233156|ncRNA_intronic,ch…
ILMN_1654588	LTR	ERVL	LTR16A	chr1|+|143498413-143498462|NONE(dist=NONE),LOC100130000(dist=188668)|intergenic,chr4_gl000194_random|+|145838-145887|MAFIP(dist=30828),NONE(dist=NONE)|intergenic,chr21|+|9999346-9999395|TEKT4P2(dist=30753),TPTE(dist=907348)|intergenic,,,,,,,,,,,,,,,,,,,,,,,,,,,,,,,,,,,,,,,,,,,,,,,,,,,,
ILMN_1710362	SINE	Alu	AluJr	chr5|+|49932226-49932275|EMB(dist=194992),PARP8(dist=29458)|intergenic,chr1|-|148199254-148199303|NBPF14(dist=173406),PPIAL4D(dist=2449)|intergenic,chr1|-|143764508-143764557|LOC100286793(dist=19921),PPIAL4G(dist=2587)|intergenic,chr1|+|148647244-148647293|PPIAL4E(dist=2449),NBPF16(dist=92149)|intergenic,chr1|+|148809248-148809297|PPIAL4D(dist=2449),LOC645166(dist=118989)|intergenic,,,,,,,,,,,,,,…
ILMN_1689012	LINE	L1	L1P2	chr1|-|148333917-148333966|PPIAL4D(dist=131381),NBPF15(dist=224222)|intergenic,chr1|+|144153293-144153342|SRGAP2P2(dist=58816),LOC728855(dist=147170)|intergenic,,,,,,,,,,,,,,,,,,,,,,,,,,,,,,,,,,,,,,,,,,,,,,,,,,,,,
ILMN_1812250	SINE	Alu	AluSx	chr1|-|144456149-144456198|PPIAL4C(dist=91903),LOC728875(dist=24548)|intergenic,chr1|-|144275906-144275955|SRGAP2P2(dist=181429),LOC728855(dist=24557)|intergenic,,,,,,,,,,,,,,,,,,,,,,,,,,,,,,,,,,,,,,,,,,,,,,,,,,,,,
ILMN_1699575	LTR	ERVL-MaLR	MLT1N2	chr1|-|147953295-147953344|FLJ39739(dist=21315),PPIAL4B(dist=1291)|intergenic,chr1|-|144362123-144362172|LOC728875(dist=20368),PPIAL4C(dist=1290)|intergenic,chr5|+|49930943-49930992|EMB(dist=193709),PARP8(dist=30741)|intergenic,chr1|+|149555077-149555126|PPIAL4C(dist=1290),LOC728855(dist=21327)|intergenic,,,,,,,,,,,,,,,,,,,,,,,,,,,,,,,,,,,,,,,,,,,,,,,,,,,
ILMN_1807262	LINE	L2	L2c	chr1|+|147562375-147562424|PDZK1P1(dist=78044),NBPF11(dist=11899)|intergenic,chr1|+|146020595-146020644|PDZK1P1(dist=77976),NBPF11(dist=11898)|intergenic,,,,,,,,,,,,,,,,,,,,,,,,,,,,,,,,,,,,,,,,,,,,,,,,,,,,,
ILMN_1776339	LINE	L1	L1ME1	chr1|-|148734795-148734844|PPIAL4E(dist=90000),NBPF16(dist=4598)|intergenic,chr1|-|148572760-148572809|NBPF15|intronic,,,,,,,,,,,,,,,,,,,,,,,,,,,,,,,,,,,,,,,,,,,,,,,,,,,,,
ILMN_1776339	LTR	ERV1	PABL_A	chr1|-|148734795-148734844|PPIAL4E(dist=90000),NBPF16(dist=4598)|intergenic,chr1|-|148572760-148572809|NBPF15|intronic,,,,,,,,,,,,,,,,,,,,,,,,,,,,,,,,,,,,,,,,,,,,,,,,,,,,,
ILMN_1711385	LTR	ERVL-MaLR	MSTA	chr1|+|215650229-215650278|KCNK2(dist=239793),KCTD3(dist=90457)|intergenic,chr12|+|30956650-30956699|LOC100287314(dist=1005),TSPAN11(dist=123139)|intergenic,,,,,,,,,,,,,,,,,,,,,,,,,,,,,,,,,,,,,,,,,,,,,,,,,,,,,
ILMN_1711385	LTR	ERVL-MaLR	MSTA-int	chr1|+|215650229-215650278|KCNK2(dist=239793),KCTD3(dist=90457)|intergenic,chr12|+|30956650-30956699|LOC100287314(dist=1005),TSPAN11(dist=123139)|intergenic,,,,,,,,,,,,,,,,,,,,,,,,,,,,,,,,,,,,,,,,,,,,,,,,,,,,,
ILMN_3246771	LTR	ERVL	LTR41	chr7|-|51461206-51461255|COBL(dist=76691),POM121L12(dist=1642094)|intergenic,chr1|-|243221352-243221401|LOC731275|ncRNA_intronic,chr1|-|222651275-222651324|DUSP10(dist=735759),HHIPL2(dist=44278)|intergenic,chr11|-|132153-132202|LOC100133161|upstream,chr7|+|45846265-45846314|SEPT7P2(dist=37648),IGFBP1(dist=81645)|intergenic,chr7|+|128290414-128290463|FLJ45340|ncRNA_intronic,chr1|+|228154405-228154…
ILMN_1729660	SINE	Alu	AluJr4	chr1|-|243222018-243222067|LOC731275|ncRNA_intronic,chr1|-|670038-670087|LOC100133331(dist=4307),LOC100288069(dist=30158)|intergenic,chr1|-|666630-666679|LOC100133331|upstream,chr19|-|203108-203157|FLJ45445|upstream,chr11|-|132819-132868|LOC100133161|upstream,chr1|-|673445-673494|LOC100133331(dist=7714),LOC100288069(dist=26751)|intergenic,chr1|-|222651941-222651990|DUSP10(dist=736425),HHIPL2(dist…
ILMN_1844299	LTR	ERV1	HERVH-int	chr10|-|53795008-53795057|PRKG1|intronic,chr11|-|6092554-6092603|OR56A1(dist=43583),OR56B4(dist=36406)|intergenic,chr8|-|114523227-114523276|CSMD3(dist=73985),TRPS1(dist=1897448)|intergenic,chr8|-|129625645-129625694|MIR1208(dist=463211),LOC728724(dist=603019)|intergenic,chr7|-|9394536-9394585|NXPH1(dist=601943),PER4(dist=279315)|intergenic,chr16|-|70651868-70651917|IL34|intronic,chr13|-|66716947…
ILMN_1786606	LTR	ERVL-MaLR	THE1C	chr2|-|114367337-114367386|DDX11L2(dist=6043),RPL23AP7(dist=1430)|intergenic,chr2|-|243159094-243159143|LOC728323(dist=56625),NONE(dist=NONE)|intergenic,chr17|+|81190769-81190818|FLJ43681(dist=2196),NONE(dist=NONE)|intergenic,chr1|+|249233127-249233176|PGBD2(dist=19782),NONE(dist=NONE)|intergenic,chr5|+|180901402-180901451|OR4F29(dist=106176),NONE(dist=NONE)|intergenic,chr21|+|48112736-48112785|P…
ILMN_1724269	LINE	L1	L1MDa	chr2|-|6378707-6378756|LOC400940(dist=250343),LINC00487(dist=490544)|intergenic,chr2|-|6378739-6378788|LOC400940(dist=250375),LINC00487(dist=490512)|intergenic,chr2|-|6378771-6378820|LOC400940(dist=250407),LINC00487(dist=490480)|intergenic,chr2|-|6378803-6378852|LOC400940(dist=250439),LINC00487(dist=490448)|intergenic,chr2|-|6378835-6378884|LOC400940(dist=250471),LINC00487(dist=490416)|intergenic…
ILMN_1671585	LTR	ERV1	Harlequin-int	chr4|+|36912279-36912328|DTHD1(dist=564901),MIR4801(dist=331204)|intergenic,chr19|-|22539961-22540010|ZNF729(dist=39983),ZNF98(dist=33889)|intergenic,chr11|-|59871524-59871573|MS4A2(dist=5584),MS4A6A(dist=67507)|intergenic,chr2|-|13668768-13668817|LOC100506474(dist=521630),FAM84A(dist=1103993)|intergenic,chr8|+|59608696-59608745|NSMAF(dist=36292),TOX(dist=109232)|intergenic,chrX|+|119233998-11923…
ILMN_1666074	LINE	RTE	L4	chr2|+|107123332-107123381|RGPD3(dist=38531),ST6GAL2(dist=294675)|intergenic,chr2|-|87069445-87069494|CD8B|intronic,,,,,,,,,,,,,,,,,,,,,,,,,,,,,,,,,,,,,,,,,,,,,,,,,,,,,
ILMN_1793373	SINE	Alu	AluSc	chr2|-|88071197-88071246|RGPD1,RGPD2|intronic,chr2|+|87225323-87225372|LOC100286979(dist=103158),PLGLB2(dist=12216)|intergenic,,,,,,,,,,,,,,,,,,,,,,,,,,,,,,,,,,,,,,,,,,,,,,,,,,,,,
ILMN_1719149	LINE	L2	L2a	chr2|+|87389815-87389864|LOC285074(dist=86279),LINC00152(dist=365110)|intergenic,chr2|-|87258210-87258259|LOC285074|ncRNA_intronic,chr2|-|112560292-112560341|ANAPC1|intronic,chr2|+|88038307-88038356|MIR4435-1(dist=108954),RGPD1(dist=17123)|intergenic,,,,,,,,,,,,,,,,,,,,,,,,,,,,,,,,,,,,,,,,,,,,,,,,,,,
ILMN_1906423	LTR	ERVL-MaLR	MLT1J	chr2|-|87739115-87739164|LOC285074(dist=435579),LINC00152(dist=15810)|intergenic,chr2|-|87666719-87666768|LOC285074(dist=363183),LINC00152(dist=88206)|intergenic,,,,,,,,,,,,,,,,,,,,,,,,,,,,,,,,,,,,,,,,,,,,,,,,,,,,,
ILMN_1770473	LINE	L1	L1MDa	chr2|+|87887932-87887981|LINC00152(dist=66902),MIR4435-1(dist=41293)|intergenic,chr2|-|112119938-112119987|MIR4435-1(dist=41270),LOC541471(dist=4604)|intergenic,,,,,,,,,,,,,,,,,,,,,,,,,,,,,,,,,,,,,,,,,,,,,,,,,,,,,
ILMN_1681811	SINE	Alu	AluSz	chr2|-|113164103-113164152|RGPD5,RGPD8|intronic,chr2|-|111309530-111309579|RGPD5,RGPD6|intronic,chr2|-|88100353-88100402|RGPD1,RGPD2|intronic,chr2|+|108470821-108470870|RGPD4|intronic,chr2|+|109362976-109363025|RANBP2|intronic,chr2|+|87196160-87196209|LOC100286979(dist=73995),PLGLB2(dist=41379)|intergenic,chr2|+|110577082-110577131|RGPD5,RGPD6|intronic,,,,,,,,,,,,,,,,,,,,,,,,,,,,,,,,,,,,,,,,,,,,,…
ILMN_1702309	LINE	L1	L1M1	chr10|-|39028712-39028761|ACTR3BP5(dist=37341),NONE(dist=NONE)|intergenic,chrY|-|13590782-13590831|NONE(dist=NONE),GYG2P1(dist=927084)|intergenic,chr22|-|17006733-17006782|OR11H1(dist=556929),CCT8L2(dist=64866)|intergenic,chr2|-|92167957-92168006|ACTR3BP2(dist=37461),NONE(dist=NONE)|intergenic,chr2|+|91748682-91748731|NONE(dist=NONE),LOC654342(dist=75978)|intergenic,chr16|+|33313975-33314024|LOC3…
ILMN_1799207	LTR	ERV1	MER92A	chr2|-|91910526-91910575|LOC654342(dist=62551),GGT8P(dist=52793)|intergenic,chrUn_gl000212|+|152871-152920|LINC00281(dist=92103),NONE(dist=NONE)|intergenic,,,,,,,,,,,,,,,,,,,,,,,,,,,,,,,,,,,,,,,,,,,,,,,,,,,,,
ILMN_1687184	LTR	ERVL	HERVL-int	chr2|-|92010176-92010225|GGT8P(dist=40023),ACTR3BP2(dist=118934)|intergenic,chrUn_gl000217|-|307-356|NONE(dist=NONE),NONE(dist=NONE)|intergenic,chr22|+|17381214-17381263|HSFY1P1(dist=70989),GAB4(dist=61564)|intergenic,chr2|+|92218591-92218640|ACTR3BP2(dist=88095),NONE(dist=NONE)|intergenic,,,,,,,,,,,,,,,,,,,,,,,,,,,,,,,,,,,,,,,,,,,,,,,,,,,
ILMN_1673214	LTR	ERVL	HERVL-int	chr2|+|92218298-92218347|ACTR3BP2(dist=87802),NONE(dist=NONE)|intergenic,chr2|-|92010469-92010518|GGT8P(dist=40316),ACTR3BP2(dist=118641)|intergenic,,,,,,,,,,,,,,,,,,,,,,,,,,,,,,,,,,,,,,,,,,,,,,,,,,,,,
ILMN_3241382	LINE	L1	L1MC4	chr9|+|69448750-69448799|ANKRD20A4(dist=23641),LOC100133920(dist=202562)|intergenic,chr9|-|44050800-44050849|CNTNAP3B(dist=128327),FAM27C(dist=939387)|intergenic,chr9|-|66398237-66398286|FAM75A5(dist=888627),LOC442421(dist=95983)|intergenic,chr9|-|43066739-43066788|FAM95B1(dist=33427),ANKRD20A3(dist=23184)|intergenic,chr2|-|95455978-95456027|ANKRD20A8P|ncRNA_exonic,chr9|+|42435114-42435163|ANKRD2…
ILMN_1892010	LTR	ERVL	MER68	chr2|-|98187107-98187156|ANKRD36B|intronic,chr2|-|96638157-96638206|TRIM43(dist=372688),LOC729234(dist=38093)|intergenic,chr2|+|97798536-97798585|ANKRD36|intronic,,,,,,,,,,,,,,,,,,,,,,,,,,,,,,,,,,,,,,,,,,,,,,,,,,,,
ILMN_1667738	LINE	L1	L1MD2	chr2|+|109306436-109306485|LIMS1(dist=2734),RANBP2(dist=29452)|intergenic,chr2|-|111336337-111336386|RGPD5,RGPD6|upstream,chr2|+|110550258-110550307|RGPD5,RGPD6|upstream,,,,,,,,,,,,,,,,,,,,,,,,,,,,,,,,,,,,,,,,,,,,,,,,,,,,
ILMN_3203683	LINE	L1	L1MA5	chr2|+|111391414-111391463|RGPD6(dist=55105),BUB1(dist=3946)|intergenic,chr2|-|110495159-110495208|ANKRD57(dist=118595),RGPD5(dist=55127)|intergenic,,,,,,,,,,,,,,,,,,,,,,,,,,,,,,,,,,,,,,,,,,,,,,,,,,,,,
ILMN_3203683	LINE	L1	L1M2	chr2|+|111391414-111391463|RGPD6(dist=55105),BUB1(dist=3946)|intergenic,chr2|-|110495159-110495208|ANKRD57(dist=118595),RGPD5(dist=55127)|intergenic,,,,,,,,,,,,,,,,,,,,,,,,,,,,,,,,,,,,,,,,,,,,,,,,,,,,,
ILMN_1899673	SINE	MIR	MIRb	chr9|+|182856-182905|CBWD1(dist=3781),C9orf66(dist=30203)|intergenic,chr9|-|70853016-70853065|CBWD3(dist=362839),CBWD3(dist=3774)|intergenic,chr2|-|114191515-114191564|PAX8(dist=155017),CBWD2(dist=3704)|intergenic,chr9|+|70493952-70494001|CBWD3(dist=3775),CBWD3(dist=362838)|intergenic,chr9|+|69266374-69266423|CBWD6(dist=3781),ANKRD20A4(dist=115558)|intergenic,,,,,,,,,,,,,,,,,,,,,,,,,,,,,,,,,,,,,,…
ILMN_1731838	LTR	ERVL	ERVL-int	chr6_ssto_hap7|+|2732748-2732797|NONE(dist=NONE),NONE(dist=NONE)|intergenic,chr4|-|60409897-60409946|NONE(dist=NONE),LPHN3(dist=1952893)|intergenic,chrX|-|98109075-98109124|DIAPH2(dist=1253478),LOC442459(dist=607476)|intergenic,chr14|-|70901696-70901745|SYNJ2BP-COX16(dist=17889),ADAM21(dist=17129)|intergenic,chr14|-|57798504-57798553|MUDENG(dist=41707),NAA30(dist=58718)|intergenic,chr14|-|7029263…
ILMN_1670058	LTR	ERV1	HERV17-int	chr12|-|8915831-8915880|RIMKLB|intronic,chr15|-|67263653-67263702|SMAD6(dist=189316),SMAD3(dist=94493)|intergenic,chrX|-|115873723-115873772|CXorf61(dist=279586),KLHL13(dist=1158004)|intergenic,chr2|-|172418282-172418331|CYBRD1(dist=3639),DYNC1I2(dist=125651)|intergenic,,,,,,,,,,,,,,,,,,,,,,,,,,,,,,,,,,,,,,,,,,,,,,,,,,,
ILMN_1699769	LTR	ERV1	HERVH-int	chr16|-|8934341-8934390|PMM2|intronic,chr2|-|188425207-188425256|TFPI(dist=5988),GULP1(dist=732134)|intergenic,chr3|+|175551416-175551465|NAALADL2(dist=27988),TBL1XR1(dist=1187077)|intergenic,,,,,,,,,,,,,,,,,,,,,,,,,,,,,,,,,,,,,,,,,,,,,,,,,,,,
ILMN_2125590	LINE	L1	L1PA5	chr3|-|75796441-75796490|ZNF717|intronic,chrX|-|26886891-26886940|VENTXP1(dist=307722),SMEK3P(dist=591388)|intergenic,chrUn_gl000222|+|6222-6271|NONE(dist=NONE),MIR4273(dist=8923)|intergenic,chr2|+|238371338-238371387|COL6A3(dist=48488),MLPH(dist=24491)|intergenic,chr11|+|11718092-11718141|MIR4299(dist=39823),USP47(dist=144829)|intergenic,chr6_dbb_hap3|+|3512457-3512506|NONE(dist=NONE),NONE(dist=…
ILMN_1681260	LTR	ERV1	HERVH-int	chr3|+|6444659-6444708|MIR4790(dist=1152719),GRM7(dist=458094)|intergenic,chr6|+|63299264-63299313|KHDRBS2(dist=303164),LGSN(dist=686543)|intergenic,,,,,,,,,,,,,,,,,,,,,,,,,,,,,,,,,,,,,,,,,,,,,,,,,,,,,
ILMN_3233071	LTR	ERVL	MLT2B1	chr4|+|4087045-4087094|FAM86EP(dist=129897),OTOP1(dist=103436)|intergenic,chr3|-|15175011-15175060|ZFYVE20(dist=34356),COL6A4P1(dist=31809)|intergenic,chr7|+|97536266-97536315|ASNS(dist=34412),MGC72080(dist=59593)|intergenic,chr12|+|8520263-8520312|LOC389634|ncRNA_intronic,chr11|+|67701689-67701738|FAM86C2P(dist=128882),UNC93B1(dist=56837)|intergenic,,,,,,,,,,,,,,,,,,,,,,,,,,,,,,,,,,,,,,,,,,,,,,,…
ILMN_1707386	SINE	MIR	MIR	chr3|+|75627711-75627760|FAM86DP(dist=143445),MIR1324(dist=52154)|intergenic,chr4|-|9535606-9535655|DEFB131(dist=83366),MIR548I2(dist=22134)|intergenic,chr3|-|125487008-125487057|OSBPL11(dist=172627),MIR548I1(dist=22190)|intergenic,chrUn_gl000222|-|175016-175065|FLJ20518(dist=85706),NONE(dist=NONE)|intergenic,chr12|+|8548477-8548526|LOC389634(dist=5129),CLEC6A(dist=60065)|intergenic,chr8|+|125222…
ILMN_3246170	LINE	L2	L2b	chr3|+|129722328-129722377|TRH(dist=25549),ALG1L2(dist=78297)|intergenic,chr12|+|8549713-8549762|LOC389634(dist=6365),CLEC6A(dist=58829)|intergenic,chr8|+|12465496-12465545|LOC100506990(dist=41142),LONRF1(dist=113861)|intergenic,chr4|+|4109701-4109750|FAM86EP(dist=152553),OTOP1(dist=80780)|intergenic,chr4|-|9533521-9533570|DEFB131(dist=81281),MIR548I2(dist=24219)|intergenic,chr3|-|125484916-12548…
ILMN_3237795	LINE	L1	L1MB8	chr4|-|4079611-4079660|FAM86EP(dist=122463),OTOP1(dist=110870)|intergenic,chr8|-|12429032-12429081|LOC100506990(dist=4678),LONRF1(dist=150325)|intergenic,chr3|+|125513507-125513556|MIR548I1(dist=4112),LOC100125556(dist=121888)|intergenic,,,,,,,,,,,,,,,,,,,,,,,,,,,,,,,,,,,,,,,,,,,,,,,,,,,,
ILMN_1707386	SINE	MIR	MIRb	chr3|+|75627711-75627760|FAM86DP(dist=143445),MIR1324(dist=52154)|intergenic,chr4|-|9535606-9535655|DEFB131(dist=83366),MIR548I2(dist=22134)|intergenic,chr3|-|125487008-125487057|OSBPL11(dist=172627),MIR548I1(dist=22190)|intergenic,chrUn_gl000222|-|175016-175065|FLJ20518(dist=85706),NONE(dist=NONE)|intergenic,chr12|+|8548477-8548526|LOC389634(dist=5129),CLEC6A(dist=60065)|intergenic,chr8|+|125222…
ILMN_3265742	SINE	Alu	AluY	chr3|+|129916373-129916422|FAM86HP(dist=86097),COL6A4P2(dist=15241)|intergenic,chr11|+|67670686-67670735|FAM86C2P(dist=97879),UNC93B1(dist=87840)|intergenic,chr12|+|8490600-8490649|FAM86FP(dist=95058),LOC389634(dist=18911)|intergenic,,,,,,,,,,,,,,,,,,,,,,,,,,,,,,,,,,,,,,,,,,,,,,,,,,,,
ILMN_3230382	LTR	ERVL	MLT2B4	chr3|+|195728199-195728248|SDHAP1(dist=11049),TFRC(dist=47907)|intergenic,chr3|-|195373393-195373442|APOD(dist=62317),SDHAP2(dist=11468)|intergenic,chr3|+|195668911-195668960|TNK2(dist=33031),SDHAP1(dist=17832)|intergenic,,,,,,,,,,,,,,,,,,,,,,,,,,,,,,,,,,,,,,,,,,,,,,,,,,,,
ILMN_3230442	LTR	ERVL	MLT2B4	chr3|+|197366113-197366162|LOC220729(dist=11361),KIAA0226(dist=32097)|intergenic,chr3|-|195373584-195373633|APOD(dist=62508),SDHAP2(dist=11277)|intergenic,,,,,,,,,,,,,,,,,,,,,,,,,,,,,,,,,,,,,,,,,,,,,,,,,,,,,
ILMN_1692263	LINE	L1	L1ME1	chr3|+|195383233-195383282|APOD(dist=72157),SDHAP2(dist=1628)|intergenic,chr3|-|197356403-197356452|LOC220729(dist=1651),KIAA0226(dist=41807)|intergenic,chr3|-|195718820-195718869|SDHAP1(dist=1670),TFRC(dist=57286)|intergenic,,,,,,,,,,,,,,,,,,,,,,,,,,,,,,,,,,,,,,,,,,,,,,,,,,,,
ILMN_3198464	LTR	ERVL	MLT2B4	chr3|-|195373726-195373775|APOD(dist=62650),SDHAP2(dist=11135)|intergenic,chr3|+|197365971-197366020|LOC220729(dist=11219),KIAA0226(dist=32239)|intergenic,chr3|+|195727775-195727824|SDHAP1(dist=10625),TFRC(dist=48331)|intergenic,,,,,,,,,,,,,,,,,,,,,,,,,,,,,,,,,,,,,,,,,,,,,,,,,,,,
ILMN_1808102	LTR	ERV1	MER83C	chr9|-|44749950-44749999|CNTNAP3B(dist=827477),FAM27C(dist=240237)|intergenic,chr9|-|67670859-67670908|AQP7P1(dist=381367),FAM27B(dist=122021)|intergenic,chr9|+|47178472-47178521|KGFLP1(dist=430086),NONE(dist=NONE)|intergenic,chr4|+|3559579-3559628|LRPAP1(dist=25355),FLJ35424(dist=18968)|intergenic,,,,,,,,,,,,,,,,,,,,,,,,,,,,,,,,,,,,,,,,,,,,,,,,,,,
ILMN_3243019	LTR	ERVK	HERVK-int	chr4|+|9130156-9130205|LOC650293(dist=178029),USP17(dist=86926)|intergenic,chr8|-|12319380-12319429|LOC100506990|ncRNA_intronic,chr11|-|3471540-3471589|LOC650368(dist=41162),TRPC2(dist=176125)|intergenic,chr4|-|3981966-3982015|FAM86EP(dist=24818),OTOP1(dist=208515)|intergenic,chr4|+|9666227-9666276|MIR548I2(dist=108290),DRD5(dist=116982)|intergenic,chr8|+|8061284-8061333|MIR548I3(dist=114673),FLJ…
ILMN_3237795	LINE	L1	L1MB7	chr4|-|4079611-4079660|FAM86EP(dist=122463),OTOP1(dist=110870)|intergenic,chr8|-|12429032-12429081|LOC100506990(dist=4678),LONRF1(dist=150325)|intergenic,chr3|+|125513507-125513556|MIR548I1(dist=4112),LOC100125556(dist=121888)|intergenic,,,,,,,,,,,,,,,,,,,,,,,,,,,,,,,,,,,,,,,,,,,,,,,,,,,,
ILMN_3179148	SINE	Alu	FLAM_A	chr8|+|12334046-12334095|LOC100506990|ncRNA_intronic,chr8|-|8046593-8046642|MIR548I3(dist=99982),FLJ10661(dist=39450)|intergenic,chr4|-|9651564-9651613|MIR548I2(dist=93627),DRD5(dist=131645)|intergenic,chr12|+|8426378-8426427|FAM86FP(dist=30836),LOC389634(dist=83133)|intergenic,chr8|+|12091558-12091607|FAM86B1(dist=39934),LOC100133267(dist=76864)|intergenic,,,,,,,,,,,,,,,,,,,,,,,,,,,,,,,,,,,,,,,,…
ILMN_3241056	LINE	L1	L1M4	chrUn_gl000211|-|53599-53648|FLJ43315|ncRNA_intronic,chrUn_gl000243|-|31261-31310|NONE(dist=NONE),NONE(dist=NONE)|intergenic,chr21|-|9709777-9709826|NONE(dist=NONE),MIR3648(dist=116006)|intergenic,chr4|-|49527233-49527282|CWH43(dist=463138),NONE(dist=NONE)|intergenic,chrUn_gl000214|+|107969-108018|NONE(dist=NONE),NONE(dist=NONE)|intergenic,chr4|+|49271981-49272030|CWH43(dist=207886),NONE(dist=NON…
ILMN_1769309	LTR	ERV1	HERV9-int	chr11|+|101103752-101103801|PGR(dist=103208),TRPC6(dist=218494)|intergenic,chr12|-|82297881-82297930|PPFIA2(dist=144772),CCDC59(dist=448153)|intergenic,chr4|-|64056980-64057029|LPHN3(dist=1118812),TECRL(dist=1087148)|intergenic,chr5|-|114333693-114333742|KCNN2(dist=501496),TRIM36(dist=126717)|intergenic,chr10|+|37565932-37565981|ANKRD30A(dist=44437),MTRNR2L7(dist=324385)|intergenic,chr8|+|2735151…
ILMN_1664965	LINE	L1	L1PBa	chr4|+|80592315-80592364|LOC100506035(dist=94701),GDEP(dist=156261)|intergenic,chr17|-|18441042-18441091|CCDC144B|downstream,chr11|+|114445122-114445171|FAM55D|intronic,chr17|+|20309775-20309824|CCDC144C(dist=4271),LGALS9B(dist=43352)|intergenic,,,,,,,,,,,,,,,,,,,,,,,,,,,,,,,,,,,,,,,,,,,,,,,,,,,
ILMN_3242833	SINE	Alu	AluJb	chr1|-|669660-669709|LOC100133331(dist=3929),LOC100288069(dist=30536)|intergenic,chr7|-|51461494-51461543|COBL(dist=76979),POM121L12(dist=1641806)|intergenic,chr11|-|132441-132490|LOC100133161|upstream,chr1|-|243221640-243221689|LOC731275|ncRNA_intronic,chr1|-|224141039-224141088|TP53BP2(dist=107365),FBXO28(dist=160703)|intergenic,chr1|-|673067-673116|LOC100133331(dist=7336),LOC100288069(dist=271…
ILMN_1736817	LTR	ERVL-MaLR	MLT1E3	chr5|-|17518043-17518092|LOC401177(dist=130624),CDH18(dist=1955063)|intergenic,chr5|-|17524911-17524960|LOC401177(dist=137492),CDH18(dist=1948195)|intergenic,chr5|-|17528345-17528394|LOC401177(dist=140926),CDH18(dist=1944761)|intergenic,chr5|-|17521477-17521526|LOC401177(dist=134058),CDH18(dist=1951629)|intergenic,chr5|+|17582817-17582866|LOC401177(dist=195398),CDH18(dist=1890289)|intergenic,chr5…
ILMN_1663657	LTR	ERVL-MaLR	MSTA-int	chr5|-|20904949-20904998|CDH18(dist=916596),GUSBP1(dist=554591)|intergenic,chr5|+|34297423-34297472|C1QTNF3-AMACR(dist=172790),RAI14(dist=358961)|intergenic,,,,,,,,,,,,,,,,,,,,,,,,,,,,,,,,,,,,,,,,,,,,,,,,,,,,,
ILMN_1799576	LTR	ERVK	HERVK3-int	chr5|+|70641148-70641197|GUSBP9(dist=86026),PMCHL2(dist=30415)|intergenic,chr5|-|21284088-21284137|CDH18(dist=1295735),GUSBP1(dist=175452)|intergenic,chr5|-|69959946-69959995|SMA5(dist=78397),SERF1A(dist=236495)|intergenic,chr5|+|69061871-69061920|GUSBP3(dist=55599),SERF1A(dist=259152)|intergenic,chr5|+|69641719-69641768|SMA4(dist=55715),GTF2H2B(dist=69429)|intergenic,,,,,,,,,,,,,,,,,,,,,,,,,,,,,…
ILMN_1728098	LTR	ERV1	LTR12E	chr5|+|21341681-21341730|CDH18(dist=1353328),GUSBP1(dist=117859)|intergenic,chr5|-|69006540-69006589|GUSBP3|upstream,chr5|-|69586272-69586321|SMA4|upstream,chr5|-|69881808-69881857|SMA5|upstream,chr5|-|70585791-70585840|GUSBP9(dist=30669),PMCHL2(dist=85772)|intergenic,chr5|-|34245076-34245125|C1QTNF3-AMACR(dist=120443),RAI14(dist=411308)|intergenic,chr6|-|26924523-26924572|GUSBP2,LINC00240|upstre…
ILMN_1759861	LINE	L2	L2	chr5|+|21388113-21388162|CDH18(dist=1399760),GUSBP1(dist=71427)|intergenic,chr6|-|26874543-26874592|GUSBP2|ncRNA_intronic,chr5|-|34200150-34200199|C1QTNF3-AMACR(dist=75517),RAI14(dist=456234)|intergenic,,,,,,,,,,,,,,,,,,,,,,,,,,,,,,,,,,,,,,,,,,,,,,,,,,,,
ILMN_1759861	LINE	L2	L2a	chr5|+|21388113-21388162|CDH18(dist=1399760),GUSBP1(dist=71427)|intergenic,chr6|-|26874543-26874592|GUSBP2|ncRNA_intronic,chr5|-|34200150-34200199|C1QTNF3-AMACR(dist=75517),RAI14(dist=456234)|intergenic,,,,,,,,,,,,,,,,,,,,,,,,,,,,,,,,,,,,,,,,,,,,,,,,,,,,
ILMN_1664103	LTR	ERVL-MaLR	THE1B	chr5|-|70075225-70075274|SMA5(dist=193676),SERF1A(dist=121216)|intergenic,chr5|-|69200159-69200208|GUSBP3(dist=193887),SERF1A(dist=120864)|intergenic,chr5|+|68926611-68926660|LOC100272216|downstream,chr5|+|68947899-68947948|GUSBP3|ncRNA_intronic,chr5|+|69527640-69527689|SMA4|ncRNA_intronic,chr5|+|69509590-69509639|LOC100170939,SMA4|ncRNA_intronic,chr5|+|70527975-70528024|GUSBP9|ncRNA_intronic,chr…
ILMN_1761301	LTR	ERVL-MaLR	MLT1A	chr5|+|69192179-69192228|GUSBP3(dist=185907),SERF1A(dist=128844)|intergenic,chr5|-|68952625-68952674|GUSBP3|ncRNA_intronic,chr5|-|69532366-69532415|SMA4|ncRNA_intronic,chr5|-|69789425-69789474|SMA5|ncRNA_intronic,chr5|-|69810708-69810757|SMA5|ncRNA_intronic,chr5|-|70514683-70514732|LOC647859(dist=125786),GUSBP9(dist=1321)|intergenic,chr5|-|70532707-70532756|GUSBP9|ncRNA_intronic,chr5|-|69828749-6…
ILMN_1885051	LTR	ERVL-MaLR	MLT1J	chr5|-|70554199-70554248|GUSBP9|ncRNA_intronic,chr5|-|69553891-69553940|SMA4|ncRNA_intronic,chr5|-|68974154-68974203|GUSBP3|ncRNA_intronic,chr5|-|69850227-69850276|GUSBP9,SMA5|ncRNA_intronic,chr5|+|69171915-69171964|GUSBP3(dist=165643),SERF1A(dist=149108)|intergenic,chr5|+|70047828-70047877|SMA5(dist=166279),SERF1A(dist=148613)|intergenic,,,,,,,,,,,,,,,,,,,,,,,,,,,,,,,,,,,,,,,,,,,,,,,,,
ILMN_1678633	LTR	ERVL	LTR41	chr5|-|70395702-70395751|LOC647859(dist=6805),GUSBP9(dist=120302)|intergenic,chr5|-|70262929-70262978|SMN2(dist=14087),NAIP(dist=1332)|intergenic,chr5|-|69387482-69387531|SMN2(dist=14060),LOC100170939(dist=35758)|intergenic,,,,,,,,,,,,,,,,,,,,,,,,,,,,,,,,,,,,,,,,,,,,,,,,,,,,
ILMN_1705534	LINE	L1	L1MC4	chr5|-|69395892-69395941|SMN2(dist=22470),LOC100170939(dist=27348)|intergenic,chr5|-|70271336-70271385|NAIP|intronic,,,,,,,,,,,,,,,,,,,,,,,,,,,,,,,,,,,,,,,,,,,,,,,,,,,,,
ILMN_1695562	LINE	L1	L1PA7	chr10|-|69261885-69261934|CTNNA3|intronic,chr5|-|86512867-86512916|MIR4280(dist=102096),RASA1(dist=51154)|intergenic,,,,,,,,,,,,,,,,,,,,,,,,,,,,,,,,,,,,,,,,,,,,,,,,,,,,,
ILMN_1869066	LTR	ERVL	LTR16B2	chr5|+|99695893-99695942|LOC100289230(dist=1429180),LOC100133050(dist=19267)|intergenic,chr5|-|98740773-98740822|LOC100289230(dist=474060),LOC100133050(dist=974387)|intergenic,,,,,,,,,,,,,,,,,,,,,,,,,,,,,,,,,,,,,,,,,,,,,,,,,,,,,
ILMN_3278626	LTR	ERVL	LTR41	chr5|-|99733558-99733607|LOC100133050(dist=9600),FAM174A(dist=137517)|intergenic,chr5|+|98852964-98853013|LOC100289230(dist=586251),LOC100133050(dist=862196)|intergenic,,,,,,,,,,,,,,,,,,,,,,,,,,,,,,,,,,,,,,,,,,,,,,,,,,,,,
ILMN_3278809	LTR	ERVL	LTR41	chr5|+|98853021-98853070|LOC100289230(dist=586308),LOC100133050(dist=862139)|intergenic,chr5|-|99733501-99733550|LOC100133050(dist=9543),FAM174A(dist=137574)|intergenic,chr6|-|58270436-58270485|GUSBP4|ncRNA_intronic,,,,,,,,,,,,,,,,,,,,,,,,,,,,,,,,,,,,,,,,,,,,,,,,,,,,
ILMN_1796353	LTR	ERVL-MaLR	MLT1J-int	chr5|-|177431552-177431601|PROP1(dist=8309),FAM153C(dist=2366)|intergenic,chr5|-|175485847-175485896|THOC3(dist=90302),FAM153B(dist=26013)|intergenic,,,,,,,,,,,,,,,,,,,,,,,,,,,,,,,,,,,,,,,,,,,,,,,,,,,,,
ILMN_3209771	LINE	L2	L2a	chr6_mcf_hap5|-|1101231-1101280|NONE(dist=NONE),NONE(dist=NONE)|intergenic,chr6|-|29800925-29800974|HLA-G(dist=2026),HLA-H(dist=54409)|intergenic,chr6_cox_hap2|-|1316843-1316892|NONE(dist=NONE),NONE(dist=NONE)|intergenic,chr6_qbl_hap6|-|1101536-1101585|NONE(dist=NONE),NONE(dist=NONE)|intergenic,chr6_mann_hap4|-|1101272-1101321|NONE(dist=NONE),NONE(dist=NONE)|intergenic,chr6_ssto_hap7|-|1138501-11…
ILMN_1655162	LTR	ERVL	LTR16B2	chr6|-|29841492-29841541|HLA-G(dist=42593),HLA-H(dist=13842)|intergenic,chr6_mcf_hap5|-|1141725-1141774|NONE(dist=NONE),NONE(dist=NONE)|intergenic,chr6_dbb_hap3|-|1142085-1142134|NONE(dist=NONE),NONE(dist=NONE)|intergenic,chr6_apd_hap1|-|1089008-1089057|NONE(dist=NONE),NONE(dist=NONE)|intergenic,chr6_cox_hap2|-|1360866-1360915|NONE(dist=NONE),NONE(dist=NONE)|intergenic,,,,,,,,,,,,,,,,,,,,,,,,,,,,…
ILMN_1654987	LINE	L1	L1M4	chr6|+|29869511-29869560|HLA-H(dist=10655),HCG4B(dist=22809)|intergenic,chr6_qbl_hap6|+|1164094-1164143|NONE(dist=NONE),NONE(dist=NONE)|intergenic,chr6_dbb_hap3|+|1164427-1164476|NONE(dist=NONE),NONE(dist=NONE)|intergenic,chr6_mcf_hap5|+|1164064-1164113|NONE(dist=NONE),NONE(dist=NONE)|intergenic,chr6_apd_hap1|+|1111278-1111327|NONE(dist=NONE),NONE(dist=NONE)|intergenic,chr6_cox_hap2|+|1383142-138…
ILMN_1913624	LTR	ERVL	LTR84b	chr6_dbb_hap3|+|1253356-1253405|NONE(dist=NONE),NONE(dist=NONE)|intergenic,chr6_ssto_hap7|+|1289337-1289386|NONE(dist=NONE),NONE(dist=NONE)|intergenic,chr6_apd_hap1|+|1199861-1199910|NONE(dist=NONE),NONE(dist=NONE)|intergenic,chr6_cox_hap2|+|1471727-1471776|NONE(dist=NONE),NONE(dist=NONE)|intergenic,chr6|+|29960010-29960059|HCG9(dist=13833),ZNRD1-AS1(dist=8729)|intergenic,chr6_mcf_hap5|+|1341874-…
ILMN_1913624	LTR	ERVL-MaLR	MLT1B	chr6_dbb_hap3|+|1253356-1253405|NONE(dist=NONE),NONE(dist=NONE)|intergenic,chr6_ssto_hap7|+|1289337-1289386|NONE(dist=NONE),NONE(dist=NONE)|intergenic,chr6_apd_hap1|+|1199861-1199910|NONE(dist=NONE),NONE(dist=NONE)|intergenic,chr6_cox_hap2|+|1471727-1471776|NONE(dist=NONE),NONE(dist=NONE)|intergenic,chr6|+|29960010-29960059|HCG9(dist=13833),ZNRD1-AS1(dist=8729)|intergenic,chr6_mcf_hap5|+|1341874-…
ILMN_3242420	LINE	L2	L2a	chr6_dbb_hap3|-|1272477-1272526|NONE(dist=NONE),NONE(dist=NONE)|intergenic,chr6_qbl_hap6|-|1272037-1272086|NONE(dist=NONE),NONE(dist=NONE)|intergenic,chr6_cox_hap2|-|1490848-1490897|NONE(dist=NONE),NONE(dist=NONE)|intergenic,chr6_apd_hap1|-|1218982-1219031|NONE(dist=NONE),NONE(dist=NONE)|intergenic,chr6|-|29979134-29979183|ZNRD1-AS1|ncRNA_intronic,chr6_mcf_hap5|-|1360998-1361047|NONE(dist=NONE),N…
ILMN_1715708	LINE	L1	L1MA4A	chr6_cox_hap2|-|1532099-1532148|NONE(dist=NONE),NONE(dist=NONE)|intergenic,chr6|-|30020006-30020055|ZNRD1-AS1|ncRNA_intronic,chr6_mcf_hap5|-|1401905-1401954|NONE(dist=NONE),NONE(dist=NONE)|intergenic,chr6_ssto_hap7|-|1350445-1350494|NONE(dist=NONE),NONE(dist=NONE)|intergenic,chr6_qbl_hap6|-|1312969-1313018|NONE(dist=NONE),NONE(dist=NONE)|intergenic,chr6_apd_hap1|-|1260230-1260279|NONE(dist=NONE),…
ILMN_1739864	LTR	ERVL-MaLR	MSTA-int	chr6|-|30251391-30251440|HLA-L(dist=16663),HCG18(dist=3734)|intergenic,chr6_mann_hap4|-|1599472-1599521|NONE(dist=NONE),NONE(dist=NONE)|intergenic,chr6_dbb_hap3|-|1545055-1545104|NONE(dist=NONE),NONE(dist=NONE)|intergenic,chr6_apd_hap1|-|1563029-1563078|NONE(dist=NONE),NONE(dist=NONE)|intergenic,chr6_qbl_hap6|-|1544298-1544347|NONE(dist=NONE),NONE(dist=NONE)|intergenic,chr6_ssto_hap7|-|1581382-15…
ILMN_1807182	LINE	L1	L1MA1	chr6|-|30254054-30254103|HLA-L(dist=19326),HCG18(dist=1071)|intergenic,chr6_ssto_hap7|-|1584045-1584094|NONE(dist=NONE),NONE(dist=NONE)|intergenic,chr6_dbb_hap3|-|1547718-1547767|NONE(dist=NONE),NONE(dist=NONE)|intergenic,chr6_apd_hap1|-|1565692-1565741|NONE(dist=NONE),NONE(dist=NONE)|intergenic,chr6_qbl_hap6|-|1546961-1547010|NONE(dist=NONE),NONE(dist=NONE)|intergenic,chr6_cox_hap2|-|1766069-176…
ILMN_1657996	LTR	ERVL-MaLR	MLT1J	chr6_qbl_hap6|-|2075346-2075395|NONE(dist=NONE),NONE(dist=NONE)|intergenic,chr6|-|30782422-30782471|IER3(dist=70095),DDR1(dist=69390)|intergenic,chr6_mann_hap4|-|2130507-2130556|NONE(dist=NONE),NONE(dist=NONE)|intergenic,chr6_cox_hap2|-|2294476-2294525|NONE(dist=NONE),NONE(dist=NONE)|intergenic,chr6_dbb_hap3|-|2076536-2076585|NONE(dist=NONE),NONE(dist=NONE)|intergenic,chr6_ssto_hap7|-|2114695-211…
ILMN_1672360	LTR	ERV1	HERVI-int	chr6|-|31303234-31303283|HLA-C(dist=63321),HLA-B(dist=18366)|intergenic,chr6_cox_hap2|-|2815901-2815950|NONE(dist=NONE),NONE(dist=NONE)|intergenic,,,,,,,,,,,,,,,,,,,,,,,,,,,,,,,,,,,,,,,,,,,,,,,,,,,,,
ILMN_1893395	LINE	L1	L1MEg	chr6_mcf_hap5|-|2827840-2827889|NONE(dist=NONE),NONE(dist=NONE)|intergenic,chr6|-|31448056-31448105|HCG26(dist=7871),MICB(dist=17750)|intergenic,chr6_qbl_hap6|-|2741762-2741811|NONE(dist=NONE),NONE(dist=NONE)|intergenic,chr6_ssto_hap7|-|2778828-2778877|NONE(dist=NONE),NONE(dist=NONE)|intergenic,chr6_dbb_hap3|-|2733390-2733439|NONE(dist=NONE),NONE(dist=NONE)|intergenic,chr6_apd_hap1|-|2762766-2762…
ILMN_1722966	LINE	L1	L1PA7	chr6_ssto_hap7|+|3579047-3579096|NONE(dist=NONE),NONE(dist=NONE)|intergenic,chr6_qbl_hap6|+|3492430-3492479|NONE(dist=NONE),NONE(dist=NONE)|intergenic,chr6|+|32231244-32231293|NOTCH4(dist=39400),C6orf10(dist=29182)|intergenic,chr6_mann_hap4|+|3574098-3574147|NONE(dist=NONE),NONE(dist=NONE)|intergenic,chr6_dbb_hap3|+|3510473-3510522|NONE(dist=NONE),NONE(dist=NONE)|intergenic,chr6_cox_hap2|+|370198…
ILMN_2125590	LINE	L1	L1PA4	chr3|-|75796441-75796490|ZNF717|intronic,chrX|-|26886891-26886940|VENTXP1(dist=307722),SMEK3P(dist=591388)|intergenic,chrUn_gl000222|+|6222-6271|NONE(dist=NONE),MIR4273(dist=8923)|intergenic,chr2|+|238371338-238371387|COL6A3(dist=48488),MLPH(dist=24491)|intergenic,chr11|+|11718092-11718141|MIR4299(dist=39823),USP47(dist=144829)|intergenic,chr6_dbb_hap3|+|3512457-3512506|NONE(dist=NONE),NONE(dist=…
ILMN_3247028	LTR	ERVL-MaLR	MSTB1	chr6_qbl_hap6|+|3918453-3918502|NONE(dist=NONE),NONE(dist=NONE)|intergenic,chr6_mcf_hap5|+|4022924-4022973|NONE(dist=NONE),NONE(dist=NONE)|intergenic,chr6_dbb_hap3|+|3968296-3968345|NONE(dist=NONE),NONE(dist=NONE)|intergenic,chr6_ssto_hap7|+|4118046-4118095|NONE(dist=NONE),NONE(dist=NONE)|intergenic,chr6|+|32686382-32686431|HLA-DQB1(dist=51916),HLA-DQA2(dist=22732)|intergenic,chr6_mann_hap4|+|414…
ILMN_1758678	LTR	ERVL-MaLR	MSTB1-int	chr6|-|58701664-58701713|GUSBP4(dist=413940),NONE(dist=NONE)|intergenic,chr6|+|58039457-58039506|PRIM2(dist=526081),GUSBP4(dist=206653)|intergenic,,,,,,,,,,,,,,,,,,,,,,,,,,,,,,,,,,,,,,,,,,,,,,,,,,,,,
ILMN_1770596	LTR	ERVL-MaLR	MSTB1-int	chr6|+|58039471-58039520|PRIM2(dist=526095),GUSBP4(dist=206639)|intergenic,chr6|-|58701650-58701699|GUSBP4(dist=413926),NONE(dist=NONE)|intergenic,,,,,,,,,,,,,,,,,,,,,,,,,,,,,,,,,,,,,,,,,,,,,,,,,,,,,
ILMN_1658018	LINE	L1	L1MDa	chr6|-|132033301-132033350|ENPP3|intronic,chr7|-|143967487-143967536|LOC728377|ncRNA_intronic,chr7|+|143879404-143879453|OR2A14(dist=52266),CTAGE4(dist=1095)|intergenic,,,,,,,,,,,,,,,,,,,,,,,,,,,,,,,,,,,,,,,,,,,,,,,,,,,,
ILMN_1903069	LTR	ERVL	MER21C	chr9|-|141126116-141126165|FAM157B|intronic,chr16|-|90187080-90187129|PRDM7(dist=44742),NONE(dist=NONE)|intergenic,chr11|+|177475-177524|LOC100133161(dist=45555),LOC653486(dist=15556)|intergenic,chr7|+|17916-17965|NONE(dist=NONE),FAM20C(dist=175004)|intergenic,,,,,,,,,,,,,,,,,,,,,,,,,,,,,,,,,,,,,,,,,,,,,,,,,,,
ILMN_3240690	LINE	L1	L1MB8	chr7|+|1878352-1878401|MAD1L1|intronic,chr22|-|23779722-23779771|ZDHHC8P1(dist=34923),IGLL1(dist=135542)|intergenic,,,,,,,,,,,,,,,,,,,,,,,,,,,,,,,,,,,,,,,,,,,,,,,,,,,,,
ILMN_1707578	LINE	L1	L1MB8	chr22|-|23779694-23779743|ZDHHC8P1(dist=34895),IGLL1(dist=135570)|intergenic,chr7|+|1878380-1878429|MAD1L1|intronic,,,,,,,,,,,,,,,,,,,,,,,,,,,,,,,,,,,,,,,,,,,,,,,,,,,,,
ILMN_1787676	LTR	ERVK	HERVK-int	chr7|-|4633512-4633561|SDK1(dist=324881),FOXK1(dist=88369)|intergenic,chr7|-|4625008-4625057|SDK1(dist=316377),FOXK1(dist=96873)|intergenic,,,,,,,,,,,,,,,,,,,,,,,,,,,,,,,,,,,,,,,,,,,,,,,,,,,,,
ILMN_1754584	LINE	L2	L2b	chr7|-|102289284-102289333|POLR2J2|intronic,chr7|-|102190190-102190239|POLR2J3|intronic,chr7|-|44035938-44035987|POLR2J4|ncRNA_intronic,chr7|+|76693397-76693446|LOC100132832(dist=11042),CCDC146(dist=58488)|intergenic,,,,,,,,,,,,,,,,,,,,,,,,,,,,,,,,,,,,,,,,,,,,,,,,,,,
ILMN_3244011	LINE	CR1	L3	chr7|+|102191962-102192011|POLR2J3,SPDYE2,SPDYE2L|intronic,chr7|-|101998160-101998209|SPDYE6(dist=1271),LOC100630923(dist=6099)|intergenic,chr7|-|72343819-72343868|SPDYE7P(dist=4164),POM121(dist=6068)|intergenic,chr7|-|76691538-76691587|LOC100132832(dist=9183),CCDC146(dist=60347)|intergenic,chr7|-|76172573-76172622|UPK3B(dist=15374),LOC100133091(dist=6036)|intergenic,chr7|+|75121590-75121639|POM1…
ILMN_1699383	SINE	Alu	AluJr	chr7|+|66754158-66754207|TYW1(dist=49660),PMS2P4(dist=3216)|intergenic,chr7|-|76160415-76160464|UPK3B(dist=3216),LOC100133091(dist=18194)|intergenic,chr7|+|44049901-44049950|POLR2J4|ncRNA_intronic,chr7|+|102303238-102303287|POLR2J2|intronic,chr7|+|102204151-102204200|POLR2J3|intronic,,,,,,,,,,,,,,,,,,,,,,,,,,,,,,,,,,,,,,,,,,,,,,,,,,
ILMN_1685239	SINE	Alu	AluJb	chr7|-|56804676-56804725|DKFZp434L192(dist=239699),LOC100130849(dist=138353)|intergenic,chr7|+|63303280-63303329|MIR4283-1(dist=221733),LOC100506050(dist=181467)|intergenic,,,,,,,,,,,,,,,,,,,,,,,,,,,,,,,,,,,,,,,,,,,,,,,,,,,,,
ILMN_1664307	LINE	CR1	L3	chr7|+|63100596-63100645|MIR4283-1(dist=19049),LOC100506050(dist=384151)|intergenic,chr7|-|57004394-57004443|LOC100130849(dist=54555),MIR4283-1(dist=19049)|intergenic,,,,,,,,,,,,,,,,,,,,,,,,,,,,,,,,,,,,,,,,,,,,,,,,,,,,,
ILMN_1882938	LTR	ERVL	LTR40a	chr7|-|63397699-63397748|MIR4283-1(dist=316152),LOC100506050(dist=87048)|intergenic,chr7|-|62864619-62864668|LOC100287834(dist=5200),MIR4283-1(dist=216800)|intergenic,chr7|+|62804199-62804248|LOC643955(dist=39765),LOC100287834(dist=5200)|intergenic,,,,,,,,,,,,,,,,,,,,,,,,,,,,,,,,,,,,,,,,,,,,,,,,,,,,
ILMN_1718311	SINE	Alu	AluSx1	chr7|+|66744421-66744470|TYW1(dist=39923),PMS2P4(dist=12953)|intergenic,chr7|-|72341376-72341425|SPDYE7P(dist=1721),POM121(dist=8511)|intergenic,chr7|-|101995706-101995755|SPDYE6|intronic,chr7|-|76689055-76689104|LOC100132832(dist=6700),CCDC146(dist=62830)|intergenic,chr7|+|75124086-75124135|SPDYE5|upstream,chr7|+|102293509-102293558|POLR2J2,SPDYE2,SPDYE2L|intronic,chr7|+|102194417-102194466|POLR…
ILMN_1661389	LINE	L1	L1ME4a	chr7|+|101980513-101980562|SH2B2(dist=18335),SPDYE6(dist=5630)|intergenic,chr7|-|66759602-66759651|PMS2P4|ncRNA_intronic,chr7|-|75139250-75139299|PMS2P3|ncRNA_intronic,chr7|+|76154971-76155020|UPK3B|intronic,,,,,,,,,,,,,,,,,,,,,,,,,,,,,,,,,,,,,,,,,,,,,,,,,,,
ILMN_1852914	LTR	ERV1	LTR45B	chr7|+|72513315-72513364|PMS2L2|ncRNA_intronic,chr7|-|74979562-74979611|PMS2L2|ncRNA_intronic,chr7|-|74923523-74923572|GATSL2(dist=56182),SPDYE8P(dist=12961)|intergenic,chr7|-|74951545-74951594|SPDYE8P(dist=4958),SPDYE8P(dist=12966)|intergenic,chr7|-|74709258-74709307|LOC100093631(dist=55799),GATSL2(dist=98298)|intergenic,chr7|+|74315398-74315447|PMS2P5|ncRNA_intronic,chr7|+|76674541-76674590|LOC…
ILMN_3237656	SINE	Alu	AluJb	chr7|+|72521467-72521516|PMS2L2(dist=6501),LOC100093631(dist=47496)|intergenic,chr7|-|74701106-74701155|LOC100093631(dist=47647),GATSL2(dist=106450)|intergenic,chr7|-|74915370-74915419|GATSL2(dist=48029),SPDYE8P(dist=21114)|intergenic,chr7|-|74971412-74971461|SPDYE8P|ncRNA_intronic,chr7|-|74943393-74943442|SPDYE8P|ncRNA_intronic,chr7|+|72493405-72493454|PMS2L2,SPDYE8P|ncRNA_intronic,,,,,,,,,,,,,,…
ILMN_3237656	SINE	Alu	AluSz6	chr7|+|72521467-72521516|PMS2L2(dist=6501),LOC100093631(dist=47496)|intergenic,chr7|-|74701106-74701155|LOC100093631(dist=47647),GATSL2(dist=106450)|intergenic,chr7|-|74915370-74915419|GATSL2(dist=48029),SPDYE8P(dist=21114)|intergenic,chr7|-|74971412-74971461|SPDYE8P|ncRNA_intronic,chr7|-|74943393-74943442|SPDYE8P|ncRNA_intronic,chr7|+|72493405-72493454|PMS2L2,SPDYE8P|ncRNA_intronic,,,,,,,,,,,,,,…
ILMN_1700466	SINE	Alu	AluSx1	chr7|+|74939076-74939125|SPDYE8P|ncRNA_intronic,chr7|-|72525783-72525832|PMS2L2(dist=10817),LOC100093631(dist=43180)|intergenic,chr7|-|72497721-72497770|PMS2L2,SPDYE8P|ncRNA_intronic,chr7|+|74911056-74911105|GATSL2(dist=43715),SPDYE8P(dist=25428)|intergenic,chr7|+|74967099-74967148|SPDYE8P|ncRNA_intronic,chr7|+|74696792-74696841|LOC100093631(dist=43333),GATSL2(dist=110764)|intergenic,,,,,,,,,,,,,…
ILMN_1884750	LINE	L1	L1ME1	chr7|-|74894080-74894129|GATSL2(dist=26739),SPDYE8P(dist=42404)|intergenic,chr7|-|74679823-74679872|LOC100093631(dist=26364),GATSL2(dist=127733)|intergenic,chr7|+|72542753-72542802|PMS2L2(dist=27787),LOC100093631(dist=26210)|intergenic,chr7|+|74352212-74352261|PMS2P5(dist=16046),GATSL1(dist=26822)|intergenic,,,,,,,,,,,,,,,,,,,,,,,,,,,,,,,,,,,,,,,,,,,,,,,,,,,
ILMN_3237656	SINE	Alu	AluJr	chr7|+|72521467-72521516|PMS2L2(dist=6501),LOC100093631(dist=47496)|intergenic,chr7|-|74701106-74701155|LOC100093631(dist=47647),GATSL2(dist=106450)|intergenic,chr7|-|74915370-74915419|GATSL2(dist=48029),SPDYE8P(dist=21114)|intergenic,chr7|-|74971412-74971461|SPDYE8P|ncRNA_intronic,chr7|-|74943393-74943442|SPDYE8P|ncRNA_intronic,chr7|+|72493405-72493454|PMS2L2,SPDYE8P|ncRNA_intronic,,,,,,,,,,,,,,…
ILMN_3278835	LTR	ERVL	MLT2B1	chr8|+|7057021-7057070|DEFA5(dist=142762),FAM90A14(dist=57356)|intergenic,chr8|-|7945503-7945552|MIR548I3|downstream,chr7|+|97536349-97536398|ASNS(dist=34495),MGC72080(dist=59510)|intergenic,,,,,,,,,,,,,,,,,,,,,,,,,,,,,,,,,,,,,,,,,,,,,,,,,,,,
ILMN_1675258	SINE	MIR	MIR	chr12|-|8541304-8541353|LOC389634|ncRNA_intronic,chr7|-|97556666-97556715|ASNS(dist=54812),MGC72080(dist=39193)|intergenic,,,,,,,,,,,,,,,,,,,,,,,,,,,,,,,,,,,,,,,,,,,,,,,,,,,,,
ILMN_3270756	LINE	L1	L1P3	chr7|-|143447584-143447633|FAM115C(dist=20411),CTAGE6P(dist=4549)|intergenic,chr7|+|143276019-143276068|CTAGE15P(dist=4775),FAM115C(dist=41977)|intergenic,,,,,,,,,,,,,,,,,,,,,,,,,,,,,,,,,,,,,,,,,,,,,,,,,,,,,
ILMN_1815104	SINE	MIR	MIR	chr7|-|143560911-143560960|FAM115A|intronic,chr7|+|143295061-143295110|CTAGE15P(dist=23817),FAM115C(dist=22935)|intergenic,,,,,,,,,,,,,,,,,,,,,,,,,,,,,,,,,,,,,,,,,,,,,,,,,,,,,
ILMN_3270756	LINE	L1	L1P2	chr7|-|143447584-143447633|FAM115C(dist=20411),CTAGE6P(dist=4549)|intergenic,chr7|+|143276019-143276068|CTAGE15P(dist=4775),FAM115C(dist=41977)|intergenic,,,,,,,,,,,,,,,,,,,,,,,,,,,,,,,,,,,,,,,,,,,,,,,,,,,,,
ILMN_1715075	LTR	LTR	MamRep1527	chr7|+|153850649-153850698|DPP6|intronic,chr7|-|149640407-149640456|ATP6V0E2(dist=62620),ACTR3C(dist=303845)|intergenic,,,,,,,,,,,,,,,,,,,,,,,,,,,,,,,,,,,,,,,,,,,,,,,,,,,,,
ILMN_3288245	LTR	ERV1	HERVE-int	chr7|+|149734689-149734738|ATP6V0E2(dist=156902),ACTR3C(dist=209563)|intergenic,chr7|-|153757621-153757670|DPP6|intronic,chr7|-|153755772-153755821|DPP6|intronic,chr7|+|149736665-149736714|ATP6V0E2(dist=158878),ACTR3C(dist=207587)|intergenic,chr7|+|149732132-149732181|ATP6V0E2(dist=154345),ACTR3C(dist=212120)|intergenic,chr7|+|149732680-149732729|ATP6V0E2(dist=154893),ACTR3C(dist=211572)|intergen…
ILMN_3301585	SINE	Alu	AluJr	chr11|-|3571815-3571864|LOC650368(dist=141437),TRPC2(dist=75850)|intergenic,chr8|+|6980279-6980328|DEFA5(dist=66020),FAM90A14(dist=134098)|intergenic,,,,,,,,,,,,,,,,,,,,,,,,,,,,,,,,,,,,,,,,,,,,,,,,,,,,,
ILMN_3301585	SINE	Alu	AluSx	chr11|-|3571815-3571864|LOC650368(dist=141437),TRPC2(dist=75850)|intergenic,chr8|+|6980279-6980328|DEFA5(dist=66020),FAM90A14(dist=134098)|intergenic,,,,,,,,,,,,,,,,,,,,,,,,,,,,,,,,,,,,,,,,,,,,,,,,,,,,,
ILMN_1890741	LINE	L2	L2a	chr8|-|6972950-6972999|DEFA5(dist=58691),FAM90A14(dist=141427)|intergenic,chr8|+|12436080-12436129|LOC100506990(dist=11726),LONRF1(dist=143277)|intergenic,,,,,,,,,,,,,,,,,,,,,,,,,,,,,,,,,,,,,,,,,,,,,,,,,,,,,
ILMN_3185204	LINE	L1	L1PA4	chr12|-|133822065-133822114|LOC647589(dist=9643),NONE(dist=NONE)|intergenic,chr8|-|90386684-90386733|MMP16(dist=1046967),RIPK2(dist=383242)|intergenic,chrX|-|151175781-151175830|GABRE(dist=32630),MAGEA5(dist=106691)|intergenic,chr8|-|32029416-32029465|NRG1|intronic,chrY|-|8062050-8062099|TTTY12(dist=383327),TTTY18(dist=489312)|intergenic,chrX|+|56204095-56204144|RRAGB(dist=418888),KLF8(dist=54678…
ILMN_3246984	LTR	ERV1	MER52A	chr9|-|41942834-41942883|LOC653501(dist=333290),MGC21881(dist=9516)|intergenic,chr9|+|66565410-66565459|LOC442421(dist=62380),LOC100133920(dist=451941)|intergenic,,,,,,,,,,,,,,,,,,,,,,,,,,,,,,,,,,,,,,,,,,,,,,,,,,,,,
ILMN_1746343	LINE	L1	L1MB4	chr9|+|33523177-33523226|SUGT1P1(dist=12013),ANKRD18B(dist=1185)|intergenic,chr9|-|66490132-66490181|FAM75A5(dist=980522),LOC442421(dist=4088)|intergenic,,,,,,,,,,,,,,,,,,,,,,,,,,,,,,,,,,,,,,,,,,,,,,,,,,,,,
ILMN_1788008	LINE	L2	L2a	chr9|-|38541203-38541252|IGFBPL1(dist=116759),ANKRD18A(dist=30109)|intergenic,chr9|+|33604602-33604651|ANKRD18B(dist=31601),ANXA2P2(dist=19572)|intergenic,,,,,,,,,,,,,,,,,,,,,,,,,,,,,,,,,,,,,,,,,,,,,,,,,,,,,
ILMN_1691361	LINE	L1	L1MB2	chr9|+|38777671-38777720|FAM201A(dist=154394),CNTNAP3(dist=295044)|intergenic,chr9|-|67654443-67654492|AQP7P1(dist=364951),FAM27B(dist=138437)|intergenic,chr9|+|45137819-45137868|FAM27C(dist=146327),FAM27A(dist=589161)|intergenic,,,,,,,,,,,,,,,,,,,,,,,,,,,,,,,,,,,,,,,,,,,,,,,,,,,,
ILMN_1878326	LTR	ERV1	MER39	chr9|+|40104342-40104391|FAM74A1(dist=197102),FAM75A3(dist=595900)|intergenic,chr9|+|40413057-40413106|FAM74A1(dist=505817),FAM75A3(dist=287185)|intergenic,,,,,,,,,,,,,,,,,,,,,,,,,,,,,,,,,,,,,,,,,,,,,,,,,,,,,
ILMN_3247045	LTR	ERVL	MER21-int	chr9|-|41950792-41950841|LOC653501(dist=341248),MGC21881(dist=1558)|intergenic,chr9|-|46683836-46683885|FAM27A(dist=955553),KGFLP1(dist=3681)|intergenic,chr9|+|42023159-42023208|KGFLP2(dist=3575),ANKRD20A2(dist=345095)|intergenic,chr9|+|66557467-66557516|LOC442421(dist=54437),LOC100133920(dist=459884)|intergenic,,,,,,,,,,,,,,,,,,,,,,,,,,,,,,,,,,,,,,,,,,,,,,,,,,,
ILMN_1723210	LTR	ERV1	MER90	chr9|+|66553056-66553105|LOC442421(dist=50026),LOC100133920(dist=464295)|intergenic,chr9|-|41955202-41955251|MGC21881|upstream,chr9|-|46688252-46688301|KGFLP1|ncRNA_intronic,chr9|+|46843498-46843547|KGFLP1(dist=95112),NONE(dist=NONE)|intergenic,chr9|+|42018741-42018790|KGFLP2|ncRNA_intronic,chr9|+|44401599-44401648|CNTNAP3B(dist=479126),FAM27C(dist=588588)|intergenic,,,,,,,,,,,,,,,,,,,,,,,,,,,,,,…
ILMN_1901769	LTR	ERVL	MER77	chr9|-|68250010-68250059|ANKRD20A3(dist=279717),LOC642236(dist=177724)|intergenic,chr9|-|42202635-42202684|KGFLP2(dist=183051),ANKRD20A2(dist=165619)|intergenic,chr9|-|70597483-70597532|CBWD3(dist=107306),CBWD3(dist=259307)|intergenic,chr9|+|45490493-45490542|FAM27C(dist=499001),FAM27A(dist=236487)|intergenic,chr9|+|45876737-45876786|FAM27A(dist=148454),KGFLP1(dist=810780)|intergenic,,,,,,,,,,,,,…
ILMN_1684922	LTR	ERV1	LTR26	chr9|-|42608976-42609025|FAM95B1(dist=134738),FOXD4L4(dist=108209)|intergenic,chr9|-|67254468-67254517|LOC100133920(dist=223486),AQP7P1(dist=15698)|intergenic,chr9|+|42892888-42892937|AQP7P3|ncRNA_exonic,,,,,,,,,,,,,,,,,,,,,,,,,,,,,,,,,,,,,,,,,,,,,,,,,,,,
ILMN_3248957	LINE	L1	L1MC3	chr9|+|42714976-42715025|FAM95B1(dist=240738),FOXD4L4(dist=2209)|intergenic,chr9|-|70181026-70181075|FOXD4L5(dist=2211),FOXD4L4(dist=245548)|intergenic,chr9|-|69204474-69204523|CBWD6|downstream,chr9|-|70431940-70431989|CBWD3,CBWD5|downstream,,,,,,,,,,,,,,,,,,,,,,,,,,,,,,,,,,,,,,,,,,,,,,,,,,,
ILMN_1729090	LINE	L1	L1MC3	chr9|+|42715172-42715221|FAM95B1(dist=240934),FOXD4L4(dist=2013)|intergenic,chr9|-|70431744-70431793|CBWD3,CBWD5|downstream,chr9|-|70180830-70180879|FOXD4L5(dist=2015),FOXD4L4(dist=245744)|intergenic,,,,,,,,,,,,,,,,,,,,,,,,,,,,,,,,,,,,,,,,,,,,,,,,,,,,
ILMN_1793430	LTR	ERVL-MaLR	MLT1H-int	chr9|+|43135935-43135984|ANKRD20A3(dist=2391),LOC642929(dist=4553)|intergenic,chr9|-|69379541-69379590|CBWD6(dist=116948),ANKRD20A4(dist=2391)|intergenic,chr9|-|67924321-67924370|FAM27B(dist=130132),ANKRD20A1(dist=2391)|intergenic,chr9|+|44120959-44121008|CNTNAP3B(dist=198486),FAM27C(dist=869228)|intergenic,,,,,,,,,,,,,,,,,,,,,,,,,,,,,,,,,,,,,,,,,,,,,,,,,,,
ILMN_3239900	SINE	MIR	MIR	chr9|-|44018307-44018356|CNTNAP3B(dist=95834),FAM27C(dist=971880)|intergenic,chr9|-|66365744-66365793|FAM75A5(dist=856134),LOC442421(dist=128476)|intergenic,,,,,,,,,,,,,,,,,,,,,,,,,,,,,,,,,,,,,,,,,,,,,,,,,,,,,
ILMN_3296607	SINE	MIR	MIR	chr9|-|44018309-44018358|CNTNAP3B(dist=95836),FAM27C(dist=971878)|intergenic,chr9|-|66365746-66365795|FAM75A5(dist=856136),LOC442421(dist=128474)|intergenic,chr9|+|69480109-69480158|ANKRD20A4(dist=55000),LOC100133920(dist=171203)|intergenic,,,,,,,,,,,,,,,,,,,,,,,,,,,,,,,,,,,,,,,,,,,,,,,,,,,,
ILMN_3202683	LTR	ERVL	LTR16C	chr9|-|66366280-66366329|FAM75A5(dist=856670),LOC442421(dist=127940)|intergenic,chr9|-|44018843-44018892|CNTNAP3B(dist=96370),FAM27C(dist=971344)|intergenic,,,,,,,,,,,,,,,,,,,,,,,,,,,,,,,,,,,,,,,,,,,,,,,,,,,,,
ILMN_1723210	LTR	ERV1	MER90a	chr9|+|66553056-66553105|LOC442421(dist=50026),LOC100133920(dist=464295)|intergenic,chr9|-|41955202-41955251|MGC21881|upstream,chr9|-|46688252-46688301|KGFLP1|ncRNA_intronic,chr9|+|46843498-46843547|KGFLP1(dist=95112),NONE(dist=NONE)|intergenic,chr9|+|42018741-42018790|KGFLP2|ncRNA_intronic,chr9|+|44401599-44401648|CNTNAP3B(dist=479126),FAM27C(dist=588588)|intergenic,,,,,,,,,,,,,,,,,,,,,,,,,,,,,,…
ILMN_1659273	LTR	ERVL-MaLR	MLT1C	chr9|+|46849964-46850013|KGFLP1(dist=101578),NONE(dist=NONE)|intergenic,chr9|+|44408066-44408115|CNTNAP3B(dist=485593),FAM27C(dist=582121)|intergenic,,,,,,,,,,,,,,,,,,,,,,,,,,,,,,,,,,,,,,,,,,,,,,,,,,,,,
ILMN_1899183	LTR	ERV1	MER57C1	chr9|+|45869195-45869244|FAM27A(dist=140912),KGFLP1(dist=818322)|intergenic,chr9|-|70605379-70605428|CBWD3(dist=115202),CBWD3(dist=251411)|intergenic,chr9|+|45482950-45482999|FAM27C(dist=491458),FAM27A(dist=244030)|intergenic,,,,,,,,,,,,,,,,,,,,,,,,,,,,,,,,,,,,,,,,,,,,,,,,,,,,
ILMN_1746343	LINE	L1	L1M4	chr9|+|33523177-33523226|SUGT1P1(dist=12013),ANKRD18B(dist=1185)|intergenic,chr9|-|66490132-66490181|FAM75A5(dist=980522),LOC442421(dist=4088)|intergenic,,,,,,,,,,,,,,,,,,,,,,,,,,,,,,,,,,,,,,,,,,,,,,,,,,,,,
ILMN_1810082	LINE	L2	L2a	chr9|-|69720611-69720660|LOC100133920(dist=55662),FOXD4L5(dist=455047)|intergenic,chr9|+|66961682-66961731|LOC442421(dist=458652),LOC100133920(dist=55669)|intergenic,chr15|+|20363730-20363779|NONE(dist=NONE),CHEK2P2(dist=124218)|intergenic,chr15|+|21370337-21370386|LOC348120(dist=171704),LOC646214(dist=562128)|intergenic,chr22|+|22662259-22662308|LOC96610|ncRNA_intronic,,,,,,,,,,,,,,,,,,,,,,,,,,,…
ILMN_1765781	SINE	MIR	MIR	chr9|-|69112653-69112702|PGM5P2|ncRNA_intronic,chr9|-|68773732-68773781|LOC100132352(dist=25360),PGM5P2(dist=306463)|intergenic,,,,,,,,,,,,,,,,,,,,,,,,,,,,,,,,,,,,,,,,,,,,,,,,,,,,,
ILMN_1660302	SINE	Alu	AluSq2	chr9|-|90748998-90749047|FAM75C2|intronic,chr9|-|90752466-90752515|FAM75C2(dist=2566),SPIN1(dist=250782)|intergenic,chr9|+|90530260-90530309|C9orf79(dist=26446),FAM75C1(dist=2568)|intergenic,,,,,,,,,,,,,,,,,,,,,,,,,,,,,,,,,,,,,,,,,,,,,,,,,,,,
ILMN_1909790	SINE	MIR	MIR	chr9|-|97126555-97126604|LOC100132077(dist=3325),HIATL1(dist=10229)|intergenic,chr9|+|99786071-99786120|HIATL2(dist=10209),CTSL2(dist=5839)|intergenic,,,,,,,,,,,,,,,,,,,,,,,,,,,,,,,,,,,,,,,,,,,,,,,,,,,,,
ILMN_1903069	LTR	ERVL	MER21B	chr9|-|141126116-141126165|FAM157B|intronic,chr16|-|90187080-90187129|PRDM7(dist=44742),NONE(dist=NONE)|intergenic,chr11|+|177475-177524|LOC100133161(dist=45555),LOC653486(dist=15556)|intergenic,chr7|+|17916-17965|NONE(dist=NONE),FAM20C(dist=175004)|intergenic,,,,,,,,,,,,,,,,,,,,,,,,,,,,,,,,,,,,,,,,,,,,,,,,,,,
ILMN_1655529	LINE	L1	L1MB5	chrX|-|684692-684741|SHOX(dist=64546),CRLF2(dist=630146)|intergenic,chrY|-|634692-634741|SHOX(dist=64546),CRLF2(dist=630146)|intergenic,,,,,,,,,,,,,,,,,,,,,,,,,,,,,,,,,,,,,,,,,,,,,,,,,,,,,
ILMN_1884150	LTR	ERV1	LTR9	chrX|-|951052-951101|SHOX(dist=330906),CRLF2(dist=363786)|intergenic,chrY|-|901052-901101|SHOX(dist=330906),CRLF2(dist=363786)|intergenic,,,,,,,,,,,,,,,,,,,,,,,,,,,,,,,,,,,,,,,,,,,,,,,,,,,,,
ILMN_1888658	LINE	L1	L1M5	chrX|-|2664132-2664181|CD99(dist=4782),XG(dist=5912)|intergenic,chrY|-|2614132-2614181|CD99(dist=4782),XGPY2(dist=6156)|intergenic,,,,,,,,,,,,,,,,,,,,,,,,,,,,,,,,,,,,,,,,,,,,,,,,,,,,,
ILMN_1806599	LINE	L2	L2b	chrX|-|3828891-3828940|LOC389906(dist=66956),NLGN4X(dist=1979143)|intergenic,chrX|-|3752040-3752089|LOC389906|ncRNA_intronic,,,,,,,,,,,,,,,,,,,,,,,,,,,,,,,,,,,,,,,,,,,,,,,,,,,,,
ILMN_3247242	SINE	Alu	AluY	chrX|-|3823067-3823116|LOC389906(dist=61132),NLGN4X(dist=1984967)|intergenic,chrX|-|3784640-3784689|LOC389906(dist=22705),NONE(dist=NONE)|intergenic,,,,,,,,,,,,,,,,,,,,,,,,,,,,,,,,,,,,,,,,,,,,,,,,,,,,,
ILMN_3185204	LINE	L1	L1PA5	chr12|-|133822065-133822114|LOC647589(dist=9643),NONE(dist=NONE)|intergenic,chr8|-|90386684-90386733|MMP16(dist=1046967),RIPK2(dist=383242)|intergenic,chrX|-|151175781-151175830|GABRE(dist=32630),MAGEA5(dist=106691)|intergenic,chr8|-|32029416-32029465|NRG1|intronic,chrY|-|8062050-8062099|TTTY12(dist=383327),TTTY18(dist=489312)|intergenic,chrX|+|56204095-56204144|RRAGB(dist=418888),KLF8(dist=54678…
ILMN_1668646	LTR	ERVL	MER77B	chrX|+|50903605-50903654|BMP15(dist=243964),NUDT10(dist=171429)|intergenic,chrX|-|50776137-50776186|BMP15(dist=116496),NUDT10(dist=298897)|intergenic,,,,,,,,,,,,,,,,,,,,,,,,,,,,,,,,,,,,,,,,,,,,,,,,,,,,,
ILMN_2127451	SINE	Alu	AluJr	chrX|+|51946012-51946061|MAGED4B(dist=10648),XAGE2(dist=166017)|intergenic,chrX|-|51794253-51794302|MAGED1(dist=148803),MAGED4B(dist=10621)|intergenic,,,,,,,,,,,,,,,,,,,,,,,,,,,,,,,,,,,,,,,,,,,,,,,,,,,,,
ILMN_1721423	LTR	ERV1	HERV3-int	chrX|-|88837390-88837439|CPXCR1(dist=827605),TGIF2LX(dist=339501)|intergenic,chrY|-|3106494-3106543|ZFY(dist=255947),TGIF2LY(dist=340583)|intergenic,,,,,,,,,,,,,,,,,,,,,,,,,,,,,,,,,,,,,,,,,,,,,,,,,,,,,
ILMN_1812597	LTR	ERV1	HERV3-int	chrY|-|3106614-3106663|ZFY(dist=256067),TGIF2LY(dist=340463)|intergenic,chrX|-|88837510-88837559|CPXCR1(dist=827725),TGIF2LX(dist=339381)|intergenic,,,,,,,,,,,,,,,,,,,,,,,,,,,,,,,,,,,,,,,,,,,,,,,,,,,,,
ILMN_1837167	LTR	ERV1	HERVH-int	chrX|+|113705056-113705105|AMOT(dist=1621013),HTR2C(dist=113446)|intergenic,chrX|+|110790992-110791041|DKFZp686D0853(dist=25365),ALG13(dist=133305)|intergenic,,,,,,,,,,,,,,,,,,,,,,,,,,,,,,,,,,,,,,,,,,,,,,,,,,,,,
ILMN_2079322	LTR	ERV1	LTR21A	chrX|+|148636624-148636673|CXorf40A(dist=4538),MAGEA9(dist=26636)|intergenic,chrX|-|149092587-149092636|MAGEA8(dist=77978),CXorf40B(dist=7779)|intergenic,,,,,,,,,,,,,,,,,,,,,,,,,,,,,,,,,,,,,,,,,,,,,,,,,,,,,
ILMN_1665081	LINE	L1	L1ME1	chrX|+|148849204-148849253|MAGEA11(dist=50276),HSFX2(dist=6473)|intergenic,chrX|-|148683448-148683497|TMEM185A|intronic,,,,,,,,,,,,,,,,,,,,,,,,,,,,,,,,,,,,,,,,,,,,,,,,,,,,,
ILMN_3185204	LINE	L1	L1MA4A	chr12|-|133822065-133822114|LOC647589(dist=9643),NONE(dist=NONE)|intergenic,chr8|-|90386684-90386733|MMP16(dist=1046967),RIPK2(dist=383242)|intergenic,chrX|-|151175781-151175830|GABRE(dist=32630),MAGEA5(dist=106691)|intergenic,chr8|-|32029416-32029465|NRG1|intronic,chrY|-|8062050-8062099|TTTY12(dist=383327),TTTY18(dist=489312)|intergenic,chrX|+|56204095-56204144|RRAGB(dist=418888),KLF8(dist=54678…
ILMN_1783024	LTR	Gypsy	MamGyp-int	chrX|+|152197406-152197455|PNMA5(dist=34735),PNMA3(dist=27311)|intergenic,chrX|-|152585819-152585868|MAGEA1(dist=99703),ZNF275(dist=13745)|intergenic,,,,,,,,,,,,,,,,,,,,,,,,,,,,,,,,,,,,,,,,,,,,,,,,,,,,,
ILMN_3251582	SINE	MIR	MIRc	chrY|-|26353629-26353678|CSPG4P1Y(dist=20251),GOLGA2P2Y(dist=2436)|intergenic,chr15|-|85045653-85045702|DNM1P41|upstream,chr15|-|84978370-84978419|LOC388152(dist=79450),DNM1P41(dist=67387)|intergenic,chr15|-|83003956-83004005|LOC440297(dist=17529),UBE2Q2P3(dist=19768)|intergenic,chrY|+|27608758-27608807|GOLGA2P2Y(dist=2436),CSPG4P1Y(dist=20248)|intergenic,chr15|+|84839840-84839889|LOC648809(dist=…
ILMN_1654137	LTR	ERVK	HERVK14C-int	chrY|-|59317133-59317182|VAMP7(dist=40694),IL9R(dist=13070)|intergenic,chrX|-|155214127-155214176|VAMP7(dist=40694),IL9R(dist=13070)|intergenic,,,,,,,,,,,,,,,,,,,,,,,,,,,,,,,,,,,,,,,,,,,,,,,,,,,,,
ILMN_1700543	LTR	ERVL	ERV3-16A3_I-int	chr22|+|16900146-16900195|OR11H1(dist=450342),CCT8L2(dist=171453)|intergenic,chr10|+|38924597-38924646|LOC399744(dist=183516),ACTR3BP5(dist=65081)|intergenic,chr10|-|42781741-42781790|NONE(dist=NONE),LOC441666(dist=45524)|intergenic,,,,,,,,,,,,,,,,,,,,,,,,,,,,,,,,,,,,,,,,,,,,,,,,,,,,
ILMN_1763556	LINE	L2	L2	chr10|+|47704898-47704947|ANTXRL(dist=3452),ANXA8L2(dist=41973)|intergenic,chr10|-|49243105-49243154|LOC399753(dist=3447),FRMPD2P1(dist=121447)|intergenic,chr10|-|46736578-46736627|BMS1P1,BMS1P5|downstream,chr10|-|47216995-47217044|AGAP9(dist=3369),LOC642826(dist=25643)|intergenic,chr10|-|48926339-48926388|BMS1P1,BMS1P5|downstream,chr10|-|46346283-46346332|AGAP4(dist=3362),PTPN20A(dist=203791)|in…
ILMN_1768112	LTR	ERV1	MER57E1	chr10|+|48207708-48207757|LOC642826(dist=21048),AGAP9(dist=7967)|intergenic,chr10|-|47221594-47221643|AGAP9(dist=7968),LOC642826(dist=21044)|intergenic,chr10|-|49247729-49247778|LOC399753(dist=8071),FRMPD2P1(dist=116823)|intergenic,,,,,,,,,,,,,,,,,,,,,,,,,,,,,,,,,,,,,,,,,,,,,,,,,,,,
ILMN_1690583	LTR	ERVL-MaLR	THE1D	chr10|-|49241684-49241733|LOC399753(dist=2026),FRMPD2P1(dist=122868)|intergenic,chr10|-|46735135-46735184|PTPN20A(dist=94132),BMS1P5(dist=2429)|intergenic,chr10|-|48924908-48924957|FRMPD2P1(dist=62220),BMS1P5(dist=2417)|intergenic,chr10|-|75459536-75459585|BMS1P4|ncRNA_intronic,chr10|-|47215581-47215630|AGAP9(dist=1955),LOC642826(dist=27057)|intergenic,chr10|+|48213720-48213769|LOC642826(dist=270…
ILMN_1688213	LTR	ERVL	MER21A	chr10|-|51607099-51607148|TIMM23|splicing,chr10|+|51387603-51387652|PARG(dist=16272),AGAP7(dist=76510)|intergenic,,,,,,,,,,,,,,,,,,,,,,,,,,,,,,,,,,,,,,,,,,,,,,,,,,,,,
ILMN_1676925	LTR	ERVL-MaLR	MLT1A1-int	chr11|-|4369615-4369664|RRM1(dist=209509),OR52B4(dist=18829)|intergenic,chr11|-|4318427-4318476|RRM1(dist=158321),OR52B4(dist=70017)|intergenic,chr11|+|4290769-4290818|RRM1(dist=130663),OR52B4(dist=97675)|intergenic,,,,,,,,,,,,,,,,,,,,,,,,,,,,,,,,,,,,,,,,,,,,,,,,,,,,
ILMN_2125590	LINE	L1	L1P2	chr3|-|75796441-75796490|ZNF717|intronic,chrX|-|26886891-26886940|VENTXP1(dist=307722),SMEK3P(dist=591388)|intergenic,chrUn_gl000222|+|6222-6271|NONE(dist=NONE),MIR4273(dist=8923)|intergenic,chr2|+|238371338-238371387|COL6A3(dist=48488),MLPH(dist=24491)|intergenic,chr11|+|11718092-11718141|MIR4299(dist=39823),USP47(dist=144829)|intergenic,chr6_dbb_hap3|+|3512457-3512506|NONE(dist=NONE),NONE(dist=…
ILMN_1675591	LTR	ERV1	HERV17-int	chr11|-|22335477-22335526|ANO5(dist=30564),SLC17A6(dist=24141)|intergenic,chr12|-|132359989-132360038|MMP17(dist=23673),ULK1(dist=19241)|intergenic,,,,,,,,,,,,,,,,,,,,,,,,,,,,,,,,,,,,,,,,,,,,,,,,,,,,,
ILMN_3231127	LINE	CR1	L3	chr11|-|89732049-89732098|TRIM53P|ncRNA_intronic,chr11|-|49895272-49895321|LOC440040(dist=63303),OR4C13(dist=78622)|intergenic,chr11|+|89578743-89578792|TRIM53P|ncRNA_intronic,,,,,,,,,,,,,,,,,,,,,,,,,,,,,,,,,,,,,,,,,,,,,,,,,,,,
ILMN_1680972	LTR	ERV1	HERV17-int	chr12|-|59247757-59247806|XRCC6BP1(dist=896705),LRIG3(dist=18131)|intergenic,chr11|-|107853528-107853577|RAB39(dist=19320),CUL5(dist=25831)|intergenic,,,,,,,,,,,,,,,,,,,,,,,,,,,,,,,,,,,,,,,,,,,,,,,,,,,,,
ILMN_1782237	LTR	ERV1	HUERS-P1-int	chr12|-|123180787-123180836|KNTC1(dist=69840),HCAR2(dist=5004)|intergenic,chr12|-|123194212-123194261|HCAR2(dist=6308),HCAR3(dist=5042)|intergenic,,,,,,,,,,,,,,,,,,,,,,,,,,,,,,,,,,,,,,,,,,,,,,,,,,,,,
ILMN_1859109	LINE	L2	L2	chr12|-|131780969-131781018|LOC116437(dist=83493),SFSWAP(dist=414617)|intergenic,chr12|+|132148886-132148935|LOC116437(dist=451410),SFSWAP(dist=46700)|intergenic,,,,,,,,,,,,,,,,,,,,,,,,,,,,,,,,,,,,,,,,,,,,,,,,,,,,,
ILMN_3186410	LINE	L2	L2	chr12|+|131781026-131781075|LOC116437(dist=83550),SFSWAP(dist=414560)|intergenic,chr12|-|132148829-132148878|LOC116437(dist=451353),SFSWAP(dist=46757)|intergenic,,,,,,,,,,,,,,,,,,,,,,,,,,,,,,,,,,,,,,,,,,,,,,,,,,,,,
ILMN_3262876	LINE	L2	L2	chr12|+|131781027-131781076|LOC116437(dist=83551),SFSWAP(dist=414559)|intergenic,chr12|-|132148828-132148877|LOC116437(dist=451352),SFSWAP(dist=46758)|intergenic,,,,,,,,,,,,,,,,,,,,,,,,,,,,,,,,,,,,,,,,,,,,,,,,,,,,,
ILMN_3272576	LINE	L2	L2	chr12|-|132148795-132148844|LOC116437(dist=451319),SFSWAP(dist=46791)|intergenic,chr12|+|131781060-131781109|LOC116437(dist=83584),SFSWAP(dist=414526)|intergenic,,,,,,,,,,,,,,,,,,,,,,,,,,,,,,,,,,,,,,,,,,,,,,,,,,,,,
ILMN_1853775	LINE	L1	L1MB7	chr12|-|133559785-133559834|ZNF605(dist=26893),ZNF26(dist=3222)|intergenic,chrUn_gl000223|+|122864-122913|ZNF26(dist=3256),NONE(dist=NONE)|intergenic,chrUn_gl000223|+|122830-122879|ZNF26(dist=3222),NONE(dist=NONE)|intergenic,chr12|-|133559751-133559800|ZNF605(dist=26859),ZNF26(dist=3256)|intergenic,,,,,,,,,,,,,,,,,,,,,,,,,,,,,,,,,,,,,,,,,,,,,,,,,,,
ILMN_2082893	SINE	Alu	AluJo	chr14|-|19887873-19887922|POTEG(dist=302931),POTEM(dist=96032)|intergenic,chr14|+|19687466-19687515|POTEG(dist=102524),POTEM(dist=296439)|intergenic,,,,,,,,,,,,,,,,,,,,,,,,,,,,,,,,,,,,,,,,,,,,,,,,,,,,,
ILMN_3210304	SINE	Alu	FLAM_C	chr22|-|16149351-16149400|NONE(dist=NONE),POTEH(dist=106932)|intergenic,chr14|-|19881560-19881609|POTEG(dist=296618),POTEM(dist=102345)|intergenic,chr14|+|19693776-19693825|POTEG(dist=108834),POTEM(dist=290129)|intergenic,,,,,,,,,,,,,,,,,,,,,,,,,,,,,,,,,,,,,,,,,,,,,,,,,,,,
ILMN_3286809	SINE	Alu	FLAM_C	chr14|+|19693913-19693962|POTEG(dist=108971),POTEM(dist=289992)|intergenic,chr22|-|16149214-16149263|NONE(dist=NONE),POTEH(dist=107069)|intergenic,chr14|-|19881423-19881472|POTEG(dist=296481),POTEM(dist=102482)|intergenic,,,,,,,,,,,,,,,,,,,,,,,,,,,,,,,,,,,,,,,,,,,,,,,,,,,,
ILMN_3231944	SINE	Alu	FLAM_C	chr14|+|20108601-20108650|POTEM(dist=88329),OR11H2(dist=72413)|intergenic,chr22|+|16376221-16376270|POTEH(dist=88284),OR11H1(dist=72554)|intergenic,,,,,,,,,,,,,,,,,,,,,,,,,,,,,,,,,,,,,,,,,,,,,,,,,,,,,
ILMN_1679274	LINE	L1	L1M3c	chr14|+|106938999-106939048|LINC00221|ncRNA_intronic,chr14|+|106857968-106858017|LINC00226(dist=113002),LINC00221(dist=80438)|intergenic,,,,,,,,,,,,,,,,,,,,,,,,,,,,,,,,,,,,,,,,,,,,,,,,,,,,,
ILMN_1757555	SINE	MIR	MIRc	chr15|-|23575656-23575705|GOLGA8E(dist=127233),LOC653061(dist=24190)|intergenic,chr15|-|28599506-28599555|HERC2(dist=32211),GOLGA8G(dist=24229)|intergenic,chr15|-|23410416-23410465|HERC2P7(dist=16473),GOLGA8E(dist=24605)|intergenic,chr15|+|22739992-22740041|GOLGA6L1|intronic,chr15|+|28802370-28802419|GOLGA8G(dist=24227),HERC2P9(dist=97169)|intergenic,,,,,,,,,,,,,,,,,,,,,,,,,,,,,,,,,,,,,,,,,,,,,,,…
ILMN_1785455	LINE	L1	L1MA3	chr15|-|32818216-32818265|LOC100288615|ncRNA_intronic,chr15|+|30773859-30773908|CHRFAM7A(dist=87995),FAM7A2(dist=90850)|intergenic,,,,,,,,,,,,,,,,,,,,,,,,,,,,,,,,,,,,,,,,,,,,,,,,,,,,,
ILMN_3271858	LINE	L2	L2	chr15|+|32777517-32777566|FAM7A2(dist=50267),LOC100288615(dist=34483)|intergenic,chr15|-|30814504-30814553|CHRFAM7A(dist=128640),FAM7A2(dist=50205)|intergenic,,,,,,,,,,,,,,,,,,,,,,,,,,,,,,,,,,,,,,,,,,,,,,,,,,,,,
ILMN_1659862	SINE	MIR	MIR	chr15|+|30846154-30846203|CHRFAM7A(dist=160290),FAM7A2(dist=18555)|intergenic,chr15|-|30704443-30704492|CHRFAM7A(dist=18579),FAM7A2(dist=160266)|intergenic,chr15|-|32745815-32745864|FAM7A2(dist=18565),LOC100288615(dist=66185)|intergenic,chr15|-|32693468-32693517|CHRNA7(dist=231084),FAM7A3(dist=5284)|intergenic,chr15|+|30429228-30429277|LOC653075|ncRNA_intronic,chr15|+|32887628-32887677|LOC1002886…
ILMN_1774111	LTR	ERV1	LTR12_	chr15|-|31380272-31380321|TRPM1|intronic,chr17|-|73021196-73021245|ICT1(dist=3840),ATP5H(dist=13710)|intergenic,,,,,,,,,,,,,,,,,,,,,,,,,,,,,,,,,,,,,,,,,,,,,,,,,,,,,
ILMN_1785455	LINE	L1	L1ME4a	chr15|-|32818216-32818265|LOC100288615|ncRNA_intronic,chr15|+|30773859-30773908|CHRFAM7A(dist=87995),FAM7A2(dist=90850)|intergenic,,,,,,,,,,,,,,,,,,,,,,,,,,,,,,,,,,,,,,,,,,,,,,,,,,,,,
ILMN_1659862	SINE	MIR	MIRb	chr15|+|30846154-30846203|CHRFAM7A(dist=160290),FAM7A2(dist=18555)|intergenic,chr15|-|30704443-30704492|CHRFAM7A(dist=18579),FAM7A2(dist=160266)|intergenic,chr15|-|32745815-32745864|FAM7A2(dist=18565),LOC100288615(dist=66185)|intergenic,chr15|-|32693468-32693517|CHRNA7(dist=231084),FAM7A3(dist=5284)|intergenic,chr15|+|30429228-30429277|LOC653075|ncRNA_intronic,chr15|+|32887628-32887677|LOC1002886…
ILMN_3250132	SINE	Alu	AluJr	chr15|-|45116006-45116055|TRIM69(dist=55981),C15orf43(dist=132848)|intergenic,chr15|+|45368930-45368979|SORD(dist=1643),DUOX2(dist=15873)|intergenic,,,,,,,,,,,,,,,,,,,,,,,,,,,,,,,,,,,,,,,,,,,,,,,,,,,,,
ILMN_1668895	SINE	MIR	MIRc	chr15|-|83016459-83016508|LOC440297(dist=30032),UBE2Q2P3(dist=7265)|intergenic,chr15|-|82937458-82937507|LOC390660(dist=13216),LOC727849(dist=7286)|intergenic,chr15|-|82639967-82640016|GOLGA6L10|intronic,,,,,,,,,,,,,,,,,,,,,,,,,,,,,,,,,,,,,,,,,,,,,,,,,,,,
ILMN_1713650	SINE	MIR	MIRb	chr15|-|85057811-85057860|GOLGA6L5|ncRNA_intronic,chr15|+|85785856-85785905|PDE8A(dist=103480),AKAP13(dist=137966)|intergenic,chr15|+|84906743-84906792|LOC388152(dist=7823),DNM1P41(dist=139014)|intergenic,chr15|+|83190797-83190846|LOC727849(dist=7867),RPS17(dist=14658)|intergenic,chr15|+|82806221-82806270|LOC727849(dist=7869),RPS17L(dist=14891)|intergenic,chr15|+|82724436-82724485|GOLGA6L9|intron…
ILMN_3235373	SINE	MIR	MIR3	chrY|+|27602751-27602800|GOLGA2P2Y,GOLGA2P3Y|ncRNA_intronic,chrY|-|27644277-27644326|CSPG4P1Y(dist=11425),CDY1(dist=123938)|intergenic,chr15|-|82935228-82935277|LOC390660(dist=10986),LOC727849(dist=9516)|intergenic,chr15|-|83014229-83014278|LOC440297(dist=27802),UBE2Q2P3(dist=9495)|intergenic,chr15|-|82637737-82637786|GOLGA6L10|intronic,chrY|-|26359636-26359685|GOLGA2P2Y,GOLGA2P3Y|ncRNA_intronic,…
ILMN_1680302	SINE	MIR	MIR	chr4|+|11372984-11373033|MIR572(dist=2439),HS3ST1(dist=26955)|intergenic,chr16|-|2316563-2316612|RNPS1|intronic,,,,,,,,,,,,,,,,,,,,,,,,,,,,,,,,,,,,,,,,,,,,,,,,,,,,,
ILMN_1784764	LINE	L2	L2b	chr16|-|14861239-14861288|PLA2G10(dist=72713),ABCC6P2(dist=55001)|intergenic,chr16|-|15047844-15047893|NPIP(dist=1913),PDXDC1(dist=20940)|intergenic,chr16|-|74427969-74428018|LOC283922(dist=25816),CLEC18B(dist=14511)|intergenic,chr16|-|16446388-16446437|PKD1P1(dist=1923),XYLT1(dist=749744)|intergenic,chr16|-|16489750-16489799|PKD1P1(dist=45285),XYLT1(dist=706382)|intergenic,chr16|-|22549768-22549…
ILMN_3246199	LTR	ERV1	MER101-int	chr16|+|14800237-14800286|PLA2G10(dist=11711),ABCC6P2(dist=116003)|intergenic,chr16|+|14839359-14839408|PLA2G10(dist=50833),ABCC6P2(dist=76881)|intergenic,,,,,,,,,,,,,,,,,,,,,,,,,,,,,,,,,,,,,,,,,,,,,,,,,,,,,
ILMN_1658647	LTR	ERV1	MER101-int	chr16|+|14800489-14800538|PLA2G10(dist=11963),ABCC6P2(dist=115751)|intergenic,chr16|-|70032354-70032403|PDXDC2P|ncRNA_intronic,chr16|-|15477156-15477205|MIR3180-4(dist=228297),MPV17L(dist=12406)|intergenic,chr16|+|14839611-14839660|PLA2G10(dist=51085),ABCC6P2(dist=76629)|intergenic,,,,,,,,,,,,,,,,,,,,,,,,,,,,,,,,,,,,,,,,,,,,,,,,,,,
ILMN_1763685	SINE	Alu	AluSq	chr16|+|15040099-15040148|NPIP|intronic,chr16|-|18457774-18457823|XYLT1(dist=893036),MIR3180-1(dist=38212)|intergenic,chr16|+|16438570-16438619|PKD1P1|ncRNA_intronic,,,,,,,,,,,,,,,,,,,,,,,,,,,,,,,,,,,,,,,,,,,,,,,,,,,,
ILMN_1710192	SINE	Alu	AluJo	chr16|-|21478217-21478266|LOC100271836|ncRNA_intronic,chr16|-|21910012-21910061|RRN3P1(dist=79517),UQCRC2(dist=54548)|intergenic,chr16|-|29457927-29457976|RUNDC2C(dist=81547),LOC606724(dist=2690)|intergenic,chr16|-|29559663-29559712|LOC440354|ncRNA_intronic,chr16|-|30299686-30299735|LOC440354,LOC595101|ncRNA_intronic,chr16|-|18890621-18890670|SMG1|intronic,chr16|-|70274743-70274792|LOC729513(dist…
ILMN_1667087	LINE	L2	L2	chr16|+|20432748-20432797|ACSM5|intronic,chr16|-|20613546-20613595|ACSM2B(dist=25851),ACSM1(dist=20964)|intergenic,,,,,,,,,,,,,,,,,,,,,,,,,,,,,,,,,,,,,,,,,,,,,,,,,,,,,
ILMN_3269141	LTR	ERVL	MLT2B1	chr16|+|20499888-20499937|ACSM2A|downstream,chr16|-|20546694-20546743|ACSM2A(dist=47703),ACSM2B(dist=1340)|intergenic,,,,,,,,,,,,,,,,,,,,,,,,,,,,,,,,,,,,,,,,,,,,,,,,,,,,,
ILMN_1667087	LINE	L2	L2b	chr16|+|20432748-20432797|ACSM5|intronic,chr16|-|20613546-20613595|ACSM2B(dist=25851),ACSM1(dist=20964)|intergenic,,,,,,,,,,,,,,,,,,,,,,,,,,,,,,,,,,,,,,,,,,,,,,,,,,,,,
ILMN_1709164	SINE	Alu	AluJo	chr16|+|28343669-28343718|SBK1(dist=8499),EIF3CL(dist=47182)|intergenic,chr16|+|29382474-29382523|RUNDC2C(dist=6094),LOC606724(dist=78143)|intergenic,chr16|+|21403343-21403392|RUNDC2B(dist=6089),NPIPL3(dist=10063)|intergenic,,,,,,,,,,,,,,,,,,,,,,,,,,,,,,,,,,,,,,,,,,,,,,,,,,,,
ILMN_1787746	LTR	ERV1	LTR48	chr16|+|22535948-22535997|LOC100132247|intronic,chr16|-|29404541-29404590|RUNDC2C(dist=28161),LOC606724(dist=56076)|intergenic,chr16|-|29506072-29506121|LOC388242(dist=27173),LOC440354(dist=32808)|intergenic,chr16|-|21425550-21425599|NPIPL3|intronic,chr16|-|30246044-30246093|LOC613037|ncRNA_intronic,chr16|-|21858006-21858055|RRN3P1(dist=27511),UQCRC2(dist=106554)|intergenic,,,,,,,,,,,,,,,,,,,,,,,…
ILMN_1694887	SINE	Alu	AluJr	chr16|-|21477313-21477362|LOC100271836|ncRNA_intronic,chr16|-|21909108-21909157|RRN3P1(dist=78613),UQCRC2(dist=55452)|intergenic,chr16|+|22484220-22484269|LOC641298|ncRNA_intronic,,,,,,,,,,,,,,,,,,,,,,,,,,,,,,,,,,,,,,,,,,,,,,,,,,,,
ILMN_1910120	LTR	ERVL-MaLR	MLT1H	chr16|-|22622000-22622049|LOC653786(dist=33814),MIR548D2(dist=107554)|intergenic,chr16|-|21805564-21805613|OTOA(dist=33514),RRN3P1(dist=2338)|intergenic,,,,,,,,,,,,,,,,,,,,,,,,,,,,,,,,,,,,,,,,,,,,,,,,,,,,,
ILMN_1784764	LINE	L2	L2c	chr16|-|14861239-14861288|PLA2G10(dist=72713),ABCC6P2(dist=55001)|intergenic,chr16|-|15047844-15047893|NPIP(dist=1913),PDXDC1(dist=20940)|intergenic,chr16|-|74427969-74428018|LOC283922(dist=25816),CLEC18B(dist=14511)|intergenic,chr16|-|16446388-16446437|PKD1P1(dist=1923),XYLT1(dist=749744)|intergenic,chr16|-|16489750-16489799|PKD1P1(dist=45285),XYLT1(dist=706382)|intergenic,chr16|-|22549768-22549…
ILMN_1720477	SINE	Alu	AluSq	chr16|+|74419842-74419891|LOC283922(dist=17689),CLEC18B(dist=22638)|intergenic,chr16|-|28359911-28359960|SBK1(dist=24741),EIF3CL(dist=30940)|intergenic,chr16|-|28473751-28473800|EIF3C(dist=58586),CLN3(dist=14800)|intergenic,chr18|-|11625332-11625381|PIEZO2(dist=476571),GNAL(dist=63755)|intergenic,chr16|+|29057933-29057982|LAT(dist=55829),RRN3P2(dist=28181)|intergenic,chr16|+|28663880-28663929|SUL…
ILMN_1657286	SINE	Alu	AluJb	chr16|+|29053595-29053644|LAT(dist=51491),RRN3P2(dist=32519)|intergenic,chr16|-|28364261-28364310|SBK1(dist=29091),EIF3CL(dist=26590)|intergenic,chr16|-|28478102-28478151|EIF3C(dist=62937),CLN3(dist=10449)|intergenic,chr16|+|74415486-74415535|LOC283922(dist=13333),CLEC18B(dist=26994)|intergenic,chr16|+|28773644-28773693|EIF3C(dist=26594),ATXN2L(dist=60721)|intergenic,chr16|+|28659528-28659577|SUL…
ILMN_1720477	SINE	Alu	AluSq2	chr16|+|74419842-74419891|LOC283922(dist=17689),CLEC18B(dist=22638)|intergenic,chr16|-|28359911-28359960|SBK1(dist=24741),EIF3CL(dist=30940)|intergenic,chr16|-|28473751-28473800|EIF3C(dist=58586),CLN3(dist=14800)|intergenic,chr18|-|11625332-11625381|PIEZO2(dist=476571),GNAL(dist=63755)|intergenic,chr16|+|29057933-29057982|LAT(dist=55829),RRN3P2(dist=28181)|intergenic,chr16|+|28663880-28663929|SUL…
ILMN_1700627	SINE	Alu	AluJo	chr16|+|28467257-28467306|EIF3C(dist=52092),CLN3(dist=21294)|intergenic,chr16|-|28670390-28670439|SULT1A1(dist=35483),EIF3C(dist=29440)|intergenic,chr16|-|28784515-28784564|EIF3C(dist=37465),ATXN2L(dist=49850)|intergenic,chr16|-|29064430-29064479|LAT(dist=62326),RRN3P2(dist=21684)|intergenic,chr18|+|11618890-11618939|PIEZO2(dist=470129),GNAL(dist=70197)|intergenic,chr16|+|70009825-70009874|PDXDC2…
ILMN_1708625	LINE	L1	L1MA7	chr16|+|32911999-32912048|SLC6A10P(dist=15536),LOC653550(dist=293537)|intergenic,chr16|-|33761431-33761480|LOC390705(dist=462729),LINC00273(dist=199572)|intergenic,chr16|+|31970453-31970502|ZNF267(dist=41826),HERC2P4(dist=192107)|intergenic,,,,,,,,,,,,,,,,,,,,,,,,,,,,,,,,,,,,,,,,,,,,,,,,,,,,
ILMN_1699805	LTR	ERV1	MER89-int	chr16|+|33008355-33008404|SLC6A10P(dist=111892),LOC653550(dist=197181)|intergenic,chr16|-|33659785-33659834|LOC390705(dist=361083),LINC00273(dist=301218)|intergenic,chr16|+|32065132-32065181|ZNF267(dist=136505),HERC2P4(dist=97428)|intergenic,,,,,,,,,,,,,,,,,,,,,,,,,,,,,,,,,,,,,,,,,,,,,,,,,,,,
ILMN_1759287	LINE	L1	L1MCb	chr16|+|32075317-32075366|ZNF267(dist=146690),HERC2P4(dist=87243)|intergenic,chr16|+|33018580-33018629|SLC6A10P(dist=122117),LOC653550(dist=186956)|intergenic,,,,,,,,,,,,,,,,,,,,,,,,,,,,,,,,,,,,,,,,,,,,,,,,,,,,,
ILMN_1773966	LTR	ERVL	MER21C	chr19|-|206405-206454|FLJ45445(dist=4196),PPAP2C(dist=74590)|intergenic,chr16|+|90227778-90227827|PRDM7(dist=85440),NONE(dist=NONE)|intergenic,,,,,,,,,,,,,,,,,,,,,,,,,,,,,,,,,,,,,,,,,,,,,,,,,,,,,
ILMN_1691966	LTR	ERVL-MaLR	MLT1C	chr17|-|20433472-20433521|KRT16P3(dist=25661),CDRT15L2(dist=49516)|intergenic,chr17|+|18317536-18317585|EVPLL(dist=24576),LOC339240(dist=7910)|intergenic,,,,,,,,,,,,,,,,,,,,,,,,,,,,,,,,,,,,,,,,,,,,,,,,,,,,,
ILMN_1664965	LINE	L1	L1PB1	chr4|+|80592315-80592364|LOC100506035(dist=94701),GDEP(dist=156261)|intergenic,chr17|-|18441042-18441091|CCDC144B|downstream,chr11|+|114445122-114445171|FAM55D|intronic,chr17|+|20309775-20309824|CCDC144C(dist=4271),LGALS9B(dist=43352)|intergenic,,,,,,,,,,,,,,,,,,,,,,,,,,,,,,,,,,,,,,,,,,,,,,,,,,,
ILMN_1729680	SINE	MIR	MIR	chr17|-|19122619-19122668|GRAPL(dist=60471),EPN2(dist=18022)|intergenic,chr17|-|18996450-18996499|GRAP(dist=46114),GRAPL(dist=34283)|intergenic,chr17|+|19062212-19062261|GRAPL|downstream,,,,,,,,,,,,,,,,,,,,,,,,,,,,,,,,,,,,,,,,,,,,,,,,,,,,
ILMN_1806215	LINE	L1	L1MC5	chr17|-|34728081-34728130|CCL4L2(dist=86241),TBC1D3H(dist=17806)|intergenic,chr17|-|36319660-36319709|TBC1D3(dist=24562),TBC1D3(dist=17819)|intergenic,chr17|-|34664621-34664670|CCL4L2(dist=22781),TBC1D3H(dist=81266)|intergenic,chr17|-|34563059-34563108|CCL4L2(dist=22785),TBC1D3C(dist=17977)|intergenic,chr17|-|60310011-60310060|MED13(dist=167368),TBC1D3P2(dist=32007)|intergenic,chr17|+|58017103-58…
ILMN_1779572	LINE	L1	L1MB7	chr17|-|43536852-43536901|PLEKHM1|intronic,chr17_ctg5_hap1|-|151917-151966|NONE(dist=NONE),NONE(dist=NONE)|intergenic,chr17|-|62802269-62802318|PLEKHM1P|ncRNA_intronic,,,,,,,,,,,,,,,,,,,,,,,,,,,,,,,,,,,,,,,,,,,,,,,,,,,,
ILMN_1785277	LINE	L2	L2a	chr17|+|44398819-44398868|ARL17A,ARL17B,LRRC37A|intronic,chr17_ctg5_hap1|+|1473515-1473564|NONE(dist=NONE),NONE(dist=NONE)|intergenic,chr17|+|44616673-44616722|ARL17A,LRRC37A2|intronic,chr17|+|45120952-45121001|RPRML(dist=64338),CDC27(dist=74310)|intergenic,chr17_ctg5_hap1|-|431928-431977|NONE(dist=NONE),NONE(dist=NONE)|intergenic,chr17_ctg5_hap1|-|214012-214061|NONE(dist=NONE),NONE(dist=NONE)|in…
ILMN_3286870	SINE	Alu	FAM	chr17_ctg5_hap1|-|1181692-1181741|NONE(dist=NONE),NONE(dist=NONE)|intergenic,chr17|+|43686435-43686484|LOC644172(dist=6687),MGC57346(dist=11228)|intergenic,,,,,,,,,,,,,,,,,,,,,,,,,,,,,,,,,,,,,,,,,,,,,,,,,,,,,
ILMN_1747315	LTR	ERVL	LTR16E2	chr17|+|43708202-43708251|MGC57346|ncRNA_intronic,chr17_ctg5_hap1|-|1159029-1159078|NONE(dist=NONE),NONE(dist=NONE)|intergenic,,,,,,,,,,,,,,,,,,,,,,,,,,,,,,,,,,,,,,,,,,,,,,,,,,,,,
ILMN_1789346	LINE	L1	L1M5	chr17|+|62927902-62927951|LRRC37A3(dist=12999),AMZ2P1(dist=34717)|intergenic,chr17|-|44360132-44360181|KIAA1267(dist=57392),LRRC37A(dist=12316)|intergenic,chr17_ctg5_hap1|+|505794-505843|NONE(dist=NONE),NONE(dist=NONE)|intergenic,,,,,,,,,,,,,,,,,,,,,,,,,,,,,,,,,,,,,,,,,,,,,,,,,,,,
ILMN_1785277	LINE	L2	L2c	chr17|+|44398819-44398868|ARL17A,ARL17B,LRRC37A|intronic,chr17_ctg5_hap1|+|1473515-1473564|NONE(dist=NONE),NONE(dist=NONE)|intergenic,chr17|+|44616673-44616722|ARL17A,LRRC37A2|intronic,chr17|+|45120952-45121001|RPRML(dist=64338),CDC27(dist=74310)|intergenic,chr17_ctg5_hap1|-|431928-431977|NONE(dist=NONE),NONE(dist=NONE)|intergenic,chr17_ctg5_hap1|-|214012-214061|NONE(dist=NONE),NONE(dist=NONE)|in…
ILMN_2141030	SINE	Alu	AluSx	chr17|-|44429305-44429354|ARL17A,ARL17B|intronic,chr17_ctg5_hap1|-|1504092-1504141|NONE(dist=NONE),NONE(dist=NONE)|intergenic,chr17_ctg5_hap1|+|401340-401389|NONE(dist=NONE),NONE(dist=NONE)|intergenic,,,,,,,,,,,,,,,,,,,,,,,,,,,,,,,,,,,,,,,,,,,,,,,,,,,,
ILMN_1728193	LINE	L2	L2c	chr17|+|44527915-44527964|NSFP1(dist=27452),LRRC37A2(dist=62112)|intergenic,chr17_ctg5_hap1|-|302750-302799|NONE(dist=NONE),NONE(dist=NONE)|intergenic,chr17|+|44745618-44745667|NSF|intronic,,,,,,,,,,,,,,,,,,,,,,,,,,,,,,,,,,,,,,,,,,,,,,,,,,,,
ILMN_2175737	SINE	Alu	AluSq2	chr19|-|20507575-20507624|ZNF486(dist=198591),MIR1270-1(dist=2457)|intergenic,chr19|-|20576734-20576783|MIR1270-1(dist=66571),ZNF826P(dist=1843)|intergenic,,,,,,,,,,,,,,,,,,,,,,,,,,,,,,,,,,,,,,,,,,,,,,,,,,,,,
ILMN_1868983	LINE	L2	L2a	chr19|-|51259351-51259400|CLEC11A(dist=30370),GPR32(dist=14458)|intergenic,chr19|-|51270430-51270479|CLEC11A(dist=41449),GPR32(dist=3379)|intergenic,,,,,,,,,,,,,,,,,,,,,,,,,,,,,,,,,,,,,,,,,,,,,,,,,,,,,
ILMN_1671651	LINE	L1	L1M3	chr19|+|54016557-54016606|ZNF813(dist=19011),ZNF331(dist=7571)|intergenic,chr19|+|53930445-53930494|ZNF765(dist=15183),LOC147804(dist=4733)|intergenic,,,,,,,,,,,,,,,,,,,,,,,,,,,,,,,,,,,,,,,,,,,,,,,,,,,,,
ILMN_1858153	LINE	L1	L1M2	chrUn_gl000217|-|39277-39326|NONE(dist=NONE),NONE(dist=NONE)|intergenic,chr22|-|22638482-22638531|VPREB1(dist=38556),LOC96610(dist=13932)|intergenic,chr21|+|9554529-9554578|NONE(dist=NONE),MIR3648(dist=271254)|intergenic,,,,,,,,,,,,,,,,,,,,,,,,,,,,,,,,,,,,,,,,,,,,,,,,,,,,
ILMN_1764503	LTR	ERVK	LTR14	chr21|+|45118621-45118670|RRP1B(dist=2661),PDXK(dist=20308)|intergenic,chr21|+|45158551-45158600|PDXK|intronic,,,,,,,,,,,,,,,,,,,,,,,,,,,,,,,,,,,,,,,,,,,,,,,,,,,,,
ILMN_1759612	LINE	RTE	L4	chr22|+|21621380-21621429|BCRP2(dist=144805),POM121L8P(dist=15285)|intergenic,chr22|+|18820139-18820188|GGT3P(dist=40665),DGCR6(dist=73548)|intergenic,chr22|-|21497681-21497730|BCRP2(dist=21106),POM121L8P(dist=138984)|intergenic,,,,,,,,,,,,,,,,,,,,,,,,,,,,,,,,,,,,,,,,,,,,,,,,,,,,
ILMN_1822442	LINE	L1	L1MD1	chr22|-|25743648-25743697|IGLL3P(dist=27455),LRP5L(dist=3688)|intergenic,chr22|+|23943722-23943771|IGLL1(dist=21227),C22orf43(dist=6868)|intergenic,,,,,,,,,,,,,,,,,,,,,,,,,,,,,,,,,,,,,,,,,,,,,,,,,,,,,
ILMN_1730328	LTR	ERVL	ERV3-16A3_I-int	chr6_cox_hap2|+|1427127-1427176|NONE(dist=NONE),NONE(dist=NONE)|intergenic,chr6_apd_hap1|+|1155262-1155311|NONE(dist=NONE),NONE(dist=NONE)|intergenic,,,,,,,,,,,,,,,,,,,,,,,,,,,,,,,,,,,,,,,,,,,,,,,,,,,,,
ILMN_1672360	LTR	ERV1	HERVIP10F-int	chr6|-|31303234-31303283|HLA-C(dist=63321),HLA-B(dist=18366)|intergenic,chr6_cox_hap2|-|2815901-2815950|NONE(dist=NONE),NONE(dist=NONE)|intergenic,,,,,,,,,,,,,,,,,,,,,,,,,,,,,,,,,,,,,,,,,,,,,,,,,,,,,
ILMN_1914054	LINE	CR1	L3	chr6_ssto_hap7|+|210446-210495|NONE(dist=NONE),NONE(dist=NONE)|intergenic,chr6|+|28869523-28869572|LOC401242(dist=38069),TRIM27(dist=1207)|intergenic,chr6_apd_hap1|+|172924-172973|NONE(dist=NONE),NONE(dist=NONE)|intergenic,chr6_mcf_hap5|+|173086-173135|NONE(dist=NONE),NONE(dist=NONE)|intergenic,chr6_cox_hap2|+|392547-392596|NONE(dist=NONE),NONE(dist=NONE)|intergenic,,,,,,,,,,,,,,,,,,,,,,,,,,,,,,,…
ILMN_2141030	SINE	Alu	AluSp	chr17|-|44429305-44429354|ARL17A,ARL17B|intronic,chr17_ctg5_hap1|-|1504092-1504141|NONE(dist=NONE),NONE(dist=NONE)|intergenic,chr17_ctg5_hap1|+|401340-401389|NONE(dist=NONE),NONE(dist=NONE)|intergenic,,,,,,,,,,,,,,,,,,,,,,,,,,,,,,,,,,,,,,,,,,,,,,,,,,,,
ILMN_1842653	LINE	L1	L1MB1	chr17_gl000205_random|-|45158-45207|NONE(dist=NONE),MGC70870(dist=71416)|intergenic,chr7_gl000195_random|-|149284-149333|LOC389831(dist=62565),NONE(dist=NONE)|intergenic,,,,,,,,,,,,,,,,,,,,,,,,,,,,,,,,,,,,,,,,,,,,,,,,,,,,,
