# Supplementary material for: Expression of most retrotransposons in human blood correlates with biological aging
Source: eLife. 2024 Oct 17;13:RP96575. doi: 10.7554/eLife.96575 (PMC11486490; doi:10.7554/eLife.96575)
Supplement: Supplementary file 5. [file elife-96575-supp5.xlsx]

## Sheet: Sheet1
Probe ID	Class	Family	SubFamily
cg24512897	LTR	ERV1	LTR12C
cg24535918	LINE	L2	L2b
cg23251678	LINE	L1	L1PBa
cg21012139	SINE	MIR	MIRb
cg08943045	DNA	TcMar-Tigger	Tigger3a
cg19408626	LINE	L1	L1MC4
cg15690400	LINE	L1	L1MC4
cg24299149	Other	Other	SVA_D
cg00231049	SINE	MIR	MIRb
cg05590755	SINE	MIR	MIRb
cg11136250	LINE	L2	L2
cg15986668	SINE	MIR	MIRc
cg25342481	LINE	L1	L1PA15
cg12141846	LINE	L2	L2c
cg18234973	SINE	Alu	AluY
cg04211018	LINE	L2	L2a
cg12037916	Other	Other	SVA_D
cg09368964	Other	Other	SVA_D
cg04247928	LINE	L2	L2c
cg10239860	LTR	ERV1	LTR1B
cg19601666	LTR	ERV1	LTR1B
cg12398314	LTR	ERV1	LTR1B
cg20457732	LTR	ERV1	LTR1B
cg12277336	DNA	TcMar-Tigger	Tigger1
cg18142265	Other	Other	SVA_D
cg27514730	LINE	L2	L2a
cg12609498	LTR	ERVL-MaLR	MLT1I
cg06100240	LTR	ERVL	LTR16A
cg13353152	LTR	ERVL	LTR16A
cg18759788	SINE	Deu	AmnSINE1
cg05332152	SINE	MIR	MIR3
cg16315980	LINE	L1	L1PA2
cg08598698	LTR	ERV1	MER52D
cg09223698	LTR	ERV1	MER52D
cg22819672	LTR	ERV1	MER52D
cg21848278	LTR	ERV1	MER52D
cg18086868	LINE	L1	L1MEd
cg17868840	LINE	L2	L2a
cg21950196	SINE	Alu	AluJr
cg21515744	SINE	Alu	AluJr
cg26412603	SINE	Alu	AluJr
cg21772589	LINE	L1	L1M5
cg16162899	LINE	L1	L1MD3
cg24669183	LINE	L1	L1MD3
cg17866181	Simple_repeat	Simple_repeat	(TG)n
cg07264491	DNA	hAT-Charlie	MER1A
cg17505339	LINE	L1	L1MEg
cg20788133	LINE	L1	HAL1
cg08939496	LTR	ERVL-MaLR	MLT1A1
cg00168193	Simple_repeat	Simple_repeat	(TATG)n
cg05898754	SINE	MIR	MIRb
cg24373735	LTR	ERVK	HERVK9-int
cg27573606	LTR	ERVL-MaLR	MLT1B
cg04195702	LTR	ERVL-MaLR	MLT1B
cg01097950	LINE	L2	L2a
cg03725447	Low_complexity	Low_complexity	GC_rich
cg25215298	Low_complexity	Low_complexity	GC_rich
cg16005420	LINE	L2	L2a
cg20453388	LINE	L2	L2a
cg24664590	LINE	L2	L2a
cg08472719	LINE	L2	L2a
cg09789536	Low_complexity	Low_complexity	GC_rich
cg26114254	LINE	L1	L1ME1
cg10010734	LINE	L1	L1ME1
cg26224305	Low_complexity	Low_complexity	GC_rich
cg09332175	LTR	ERVL-MaLR	MLT1G1
cg01922485	SINE	Alu	AluSq
cg08853797	SINE	Alu	AluYa5
cg23691733	SINE	Alu	AluSq2
cg04985032	SINE	Alu	AluJb
cg24004483	SINE	Alu	AluY
cg23281018	SINE	Alu	AluY
cg24157008	SINE	Alu	AluJb
cg25552017	SINE	Alu	AluJb
cg13552506	SINE	Alu	AluSz
cg26420561	SINE	Alu	AluSz
cg22020633	SINE	Alu	AluSz
cg01768082	LINE	L1	L1MB5
cg07589034	LINE	L1	L1MB5
cg22367159	LINE	L1	L1MB5
cg26837773	LINE	L1	L1MB5
cg15825373	LINE	L1	L1MB5
cg22618402	LINE	L1	L1MB5
cg06538872	LINE	L1	L1MB5
cg26560020	LTR	ERV1	LTR12C
cg09363892	SINE	Alu	AluJr4
cg03185752	SINE	Alu	AluJr4
cg22482746	Low_complexity	Low_complexity	GC_rich
cg25177113	Low_complexity	Low_complexity	GC_rich
cg14663984	Simple_repeat	Simple_repeat	(CCCCAG)n
cg18172484	LINE	L2	L2
cg26614117	LTR	ERVK	LTR13A
cg06095202	LTR	ERVK	LTR13A
cg07147720	Low_complexity	Low_complexity	GC_rich
cg15576492	Simple_repeat	Simple_repeat	(CCCCG)n
cg23812948	LINE	L1	L1MD3
cg26040075	LINE	L1	L1MD3
cg05007472	LTR	ERV1	LTR12C
cg01881456	LTR	ERV1	LTR12C
cg16685990	Simple_repeat	Simple_repeat	(CCA)n
cg19860160	LTR	ERV1	MER49
cg26405545	LTR	ERV1	MER49
cg12137247	LTR	ERV1	MER50
cg27302190	LINE	L1	L1PB1
cg20945607	Low_complexity	Low_complexity	GC_rich
cg21775619	LINE	L1	HAL1
cg07203151	LINE	L1	HAL1
cg02852398	LTR	ERVL-MaLR	MLT1B
cg22433276	Low_complexity	Low_complexity	GC_rich
cg03760138	LINE	L1	L1MB5
cg10399850	LINE	L1	L1MEg
cg22874652	LTR	ERVL-MaLR	MLT1D
cg26578072	LTR	ERV1	LTR46
cg08933284	SINE	MIR	MIR
cg04154653	Low_complexity	Low_complexity	GC_rich
cg18319381	LINE	L2	L2b
cg21616720	SINE	Alu	AluSx1
cg23867494	LTR	ERVL-MaLR	MLT1B
cg25282454	Simple_repeat	Simple_repeat	(CA)n
cg03935783	Simple_repeat	Simple_repeat	(CA)n
cg18367529	LINE	L1	L1MC3
cg02224920	SINE	MIR	MIRb
cg20871445	SINE	MIR	MIRb
cg17267508	LTR	ERVK	LTR13_
cg19869091	LTR	ERVK	LTR13_
cg10245314	Simple_repeat	Simple_repeat	(CGTG)n
cg17177602	LINE	L2	L2
cg17869799	SINE	Alu	AluY
cg03525583	SINE	Alu	AluSp
cg00942814	LTR	ERV1	MER4B-int
cg07812848	LTR	ERV1	MER4B-int
cg22421766	SINE	MIR	MIRb
cg24576260	SINE	MIR	MIRb
cg03003335	Simple_repeat	Simple_repeat	(CGGGG)n
cg07425625	Low_complexity	Low_complexity	GC_rich
cg06984883	Low_complexity	Low_complexity	GC_rich
cg04840417	Low_complexity	Low_complexity	GC_rich
cg10206052	Low_complexity	Low_complexity	G-rich
cg16527939	SINE	Alu	AluJb
cg26831087	SINE	Alu	AluJo
cg04232698	Simple_repeat	Simple_repeat	(CGGGGG)n
cg25063151	Low_complexity	Low_complexity	G-rich
cg22691336	LTR	ERVL	MER54A
cg14375163	Simple_repeat	Simple_repeat	(CA)n
cg20426768	LINE	L2	L2b
cg11811184	SINE	Alu	AluSx
cg24399028	SINE	Alu	AluSp
cg25397779	SINE	Alu	AluSx3
cg04230662	SINE	Alu	AluSx3
cg12525514	SINE	Alu	AluSx3
cg16661858	LTR	ERVL	MER74B
cg00009834	LTR	ERV1	LTR2B
cg27295412	LTR	ERV1	LTR2B
cg00294152	LTR	ERV1	Harlequin-int
cg07901479	LTR	ERV1	Harlequin-int
cg24555071	LTR	ERVL	LTR75
cg21001441	LTR	ERV1	HERVI-int
cg02136596	LTR	ERV1	HERVIP10F-int
cg00599812	LTR	ERV1	HERVIP10F-int
cg13969072	SINE	Alu	AluY
cg03742705	LTR	ERV1	LTR7
cg16013630	LTR	ERV1	LTR7
cg25210378	LTR	ERV1	LTR10A
cg24378791	SINE	Alu	AluJb
cg10108196	LTR	ERVK	LTR13
cg12632610	SINE	MIR	MIRb
cg08738570	Low_complexity	Low_complexity	G-rich
cg22497741	Low_complexity	Low_complexity	G-rich
cg16601494	Low_complexity	Low_complexity	GC_rich
cg15487867	Low_complexity	Low_complexity	GC_rich
cg09517190	SINE	Alu	AluSz
cg20140735	LINE	L1	L1MB8
cg20755353	LINE	L2	L2
cg14279825	LTR	ERV1	MER52A
cg23955334	SINE	Alu	AluJo
cg25311963	LTR	ERVL	LTR42
cg07147033	LTR	ERV1	MER65D
cg13897348	LTR	ERV1	MER65D
cg19246761	LTR	ERV1	MER65D
cg01229567	LTR	ERV1	MER65D
cg25004270	Low_complexity	Low_complexity	GC_rich
cg10124011	SINE	Alu	AluSg
cg23252997	SINE	Alu	AluSx
cg16673286	LINE	L1	L1MEf
cg17450090	LINE	L2	L2
cg03939105	SINE	MIR	MIRb
cg00400654	LINE	L1	L1MEg
cg14976190	DNA	TcMar-Tigger	MER47A
cg19018051	SINE	Alu	AluSg
cg23231093	SINE	Alu	AluSx
cg11851198	LINE	L1	L1M4c
cg23611477	LINE	L1	L1MEf
cg21906539	SINE	MIR	MIRb
cg11572942	SINE	Alu	AluSz
cg27391816	LINE	L1	L1MC4
cg16990280	SINE	Alu	AluSz
cg18947110	LTR	ERVL-MaLR	MSTD
cg09233730	LTR	ERVL-MaLR	MSTD
cg17266431	SINE	Alu	AluJb
cg02280859	SINE	Alu	AluJb
cg03335128	LINE	L1	L1MEb
cg05119467	LINE	L1	L1MC5
cg16677144	DNA	hAT-Charlie	MER119
cg20801637	SINE	Alu	FLAM_C
cg11228874	SINE	Alu	AluSx3
cg06196161	Low_complexity	Low_complexity	C-rich
cg23891190	Low_complexity	Low_complexity	GC_rich
cg04266169	Low_complexity	Low_complexity	G-rich
cg26160180	Low_complexity	Low_complexity	G-rich
cg15827003	Low_complexity	Low_complexity	G-rich
cg23688809	Simple_repeat	Simple_repeat	(CGGGG)n
cg22850508	LINE	L1	L1MB2
cg15102821	LINE	L1	L1MB2
cg07719258	LTR	ERV1	MER89
cg24525340	Simple_repeat	Simple_repeat	(CGTG)n
cg22452682	LTR	ERVL-MaLR	THE1D
cg22380385	SINE	Alu	AluJb
cg11956108	LINE	L1	L1MC4
cg20295049	LTR	ERV1	MER31A
cg00574213	LINE	L1	L1MEd
cg01559650	LTR	ERVL-MaLR	MLT1A0
cg19694957	LTR	ERVL-MaLR	MSTB
cg04012515	LINE	L2	L2a
cg01748832	LINE	L2	L2a
cg22792177	LTR	ERVL	ERVL-E-int
cg18270426	LINE	L1	L1MC4
cg12701697	LINE	L1	L1MC4
cg16813854	LTR	ERVL	LTR18B
cg04724873	LTR	ERVL	LTR18B
cg10759286	LINE	L1	L1MEe
cg11983992	SINE	Alu	AluJr
cg11808581	Simple_repeat	Simple_repeat	(CGGGG)n
cg04847273	LINE	L1	L1MB5
cg10837110	LINE	L1	L1MB5
cg05654059	LINE	L1	L1MB5
cg13856872	LTR	ERVL-MaLR	MLT1C
cg16650026	LTR	ERVL-MaLR	MLT1C
cg16992594	SINE	Alu	AluSx1
cg03754143	DNA	hAT-Charlie	MER5A
cg22865720	Low_complexity	Low_complexity	GC_rich
cg17355877	LINE	L1	L1M4
cg16269144	DNA	hAT-Charlie	MER58B
cg00095688	LTR	ERVL	MER74A
cg24842354	LTR	ERVL	MER74A
cg08439149	LTR	ERVL	MER74A
cg14599857	SINE	MIR	MIR
cg26252027	LINE	L1	L1MC3
cg08000672	LINE	L1	L1MC3
cg22868225	DNA	hAT-Charlie	Charlie1
cg12601506	LINE	L1	L1MC4
cg17497824	LTR	ERVL-MaLR	MLT1A0
cg08659047	LINE	L1	L1M3
cg16735509	LINE	L1	L1M3
cg02912476	SINE	Alu	FRAM
cg23276504	LTR	ERVL	LTR52
cg09322616	LTR	ERVL-MaLR	MLT1D
cg26910870	LTR	ERVL	MER21C
cg20151494	LTR	ERVL	MER21C
cg20328379	LINE	L1	L1MEg
cg27427908	LTR	ERVL-MaLR	MLT1B
cg24577455	LTR	ERVL-MaLR	MLT1C
cg21271945	DNA	hAT-Charlie	MER5A
cg01974180	LINE	L1	L1MB5
cg05340048	LINE	L1	L1MB5
cg24445388	LINE	L1	L1MB5
cg04347414	LINE	L1	L1MB5
cg00300046	LINE	L1	L1MB5
cg25726135	LTR	ERVL	MLT2B1
cg22128985	LTR	ERVL	MER68
cg18025961	LINE	L1	L1MB3
cg02854763	LINE	L1	L1MB3
cg05706173	Simple_repeat	Simple_repeat	(CGTG)n
cg07896009	DNA	TcMar-Tigger	MER47B
cg00175702	Simple_repeat	Simple_repeat	(CCG)n
cg23048698	LINE	L1	L1MB7
cg03395993	LINE	L1	L1MB7
cg01449266	LINE	L1	L1M4
cg27449973	Simple_repeat	Simple_repeat	(CGGA)n
cg02066716	Simple_repeat	Simple_repeat	(CGGA)n
cg01073918	LTR	ERVL-MaLR	MLT1A1
cg02804999	LTR	ERVL-MaLR	MLT1A
cg08200543	DNA	hAT-Charlie	MER5A
cg01894875	DNA	hAT-Charlie	MER5A
cg27312944	Simple_repeat	Simple_repeat	(CGGGG)n
cg24649713	Simple_repeat	Simple_repeat	(CGGGG)n
cg08161158	Low_complexity	Low_complexity	GC_rich
cg27528222	SINE	MIR	MIR3
cg22166144	LINE	L1	HAL1
cg26880297	LINE	L1	L1MC4
cg25314600	LINE	L1	L1MC4
cg18934822	LINE	L1	L1MC4
cg01881525	LINE	L1	L1MC4
cg12222277	LINE	L1	L1MC4
cg11191979	LINE	L1	L1MEc
cg03651199	Simple_repeat	Simple_repeat	(CACG)n
cg05788548	Simple_repeat	Simple_repeat	(CACG)n
cg00330518	LINE	L1	L1MB7
cg10057168	Low_complexity	Low_complexity	C-rich
cg08662116	LINE	L2	L2
cg19374731	LINE	L1	L1MC4
cg15836199	LINE	L1	L1MB7
cg00104098	SINE	Alu	AluJb
cg00667048	LTR	ERVL	LTR41
cg16399855	LTR	ERVL-MaLR	MLT1H2
cg00584868	Simple_repeat	Simple_repeat	(CTGGGG)n
cg12576688	Simple_repeat	Simple_repeat	(CTGGGG)n
cg01064573	Simple_repeat	Simple_repeat	(CTGGGG)n
cg22535228	Simple_repeat	Simple_repeat	(CGGGG)n
cg23812581	Simple_repeat	Simple_repeat	(CGGGG)n
cg14657417	Simple_repeat	Simple_repeat	(CGGGG)n
cg10707263	LTR	ERVL-MaLR	MLT1C
cg00030604	LTR	ERVL-MaLR	MLT1C
cg15029248	LTR	ERVL-MaLR	MLT1C
cg21285056	Simple_repeat	Simple_repeat	(CTGGGG)n
cg01985965	Low_complexity	Low_complexity	G-rich
cg18013789	LINE	L1	L1MB3
cg15678662	LINE	L1	L1MB3
cg25842470	Low_complexity	Low_complexity	GC_rich
cg10220117	LTR	ERVL-MaLR	MLT1B
cg07817856	LTR	ERVL-MaLR	MLT1B
cg15726055	LINE	L1	L1ME1
cg13221681	SINE	Alu	AluSx
cg02393107	LTR	ERVL-MaLR	MLT1I
cg16599266	Low_complexity	Low_complexity	G-rich
cg15676078	Low_complexity	Low_complexity	G-rich
cg12733759	Low_complexity	Low_complexity	G-rich
cg12100411	Low_complexity	Low_complexity	G-rich
cg10709027	Low_complexity	Low_complexity	G-rich
cg02292066	Low_complexity	Low_complexity	G-rich
cg21290290	Low_complexity	Low_complexity	G-rich
cg17843887	DNA	hAT-Charlie	Charlie22a
cg01444797	LTR	ERVL	HERVL-int
cg12593176	SINE	MIR	MIR
cg21783012	LINE	L1	L1M5
cg18108844	LINE	L2	L2b
cg20744353	LINE	L2	L2b
cg14086822	LINE	L2	L2b
cg17882544	LTR	ERV1	LTR12C
cg01004918	LTR	ERVL-MaLR	MLT1H-int
cg08165969	DNA	TcMar-Tigger	MER82
cg03747657	DNA	TcMar-Tigger	MER82
cg13428681	LINE	L1	L1ME3A
cg15644634	LTR	ERVL	LTR52
cg25847506	DNA	TcMar-Tigger	Tigger7
cg11377464	DNA	TcMar-Tigger	Tigger7
cg18181363	DNA	TcMar-Tigger	Tigger7
cg12284465	DNA	TcMar-Tigger	Tigger7
cg22615275	DNA	TcMar-Tigger	Tigger7
cg15836046	DNA	TcMar-Tigger	Tigger7
cg24484895	DNA	hAT-Charlie	Charlie19a
cg08832782	DNA	hAT-Charlie	Charlie19a
cg09173636	LINE	L1	L1MC3
cg10520226	LTR	ERVL-MaLR	MLT1C
cg20939830	LTR	ERVL	ERVL-E-int
cg04551318	LINE	L1	L1MC1
cg05000860	LINE	L1	L1MC1
cg14074351	SINE	MIR	MIRc
cg13547132	SINE	MIR	MIRc
cg00905419	DNA	hAT	MER53
cg06988547	LINE	L1	L1MB5
cg02634762	LINE	L1	L1MB5
cg00023726	LINE	L1	L1MB5
cg24428184	LINE	L2	L2b
cg15057138	SINE	MIR	MIR
cg10115148	LTR	ERVL-MaLR	THE1C-int
cg17474920	LTR	ERVL-MaLR	MLT1C
cg00500221	LINE	L1	L1ME3A
cg00028507	LTR	ERVL	ERVL-B4-int
cg12710637	LTR	ERVL	ERVL-B4-int
cg07099084	LTR	ERVL	ERVL-B4-int
cg14653390	LTR	ERVL-MaLR	MLT1F2
cg23087661	LINE	L1	L1MDa
cg10122878	LINE	L1	L1MDa
cg08110058	DNA	hAT	MER53
cg23258188	LTR	ERVL-MaLR	MLT1B
cg22029284	SINE	MIR	MIR
cg21401095	LINE	L1	L1MB4
cg01517962	LTR	ERVL-MaLR	MLT1C
cg16290522	LTR	ERVL-MaLR	MLT1C
cg04316231	SINE	MIR	MIRb
cg24460544	SINE	MIR	MIRb
cg04277097	LINE	L1	L1MB3
cg18171009	LINE	L1	L1MB3
cg21836418	Simple_repeat	Simple_repeat	(CACCC)n
cg00774867	LTR	ERVL-MaLR	MLT1C
cg21692930	SINE	MIR	MIRb
cg26864297	SINE	MIR	MIR
cg03386715	SINE	MIR	MIRb
cg04855369	SINE	MIR	MIRc
cg00103908	LINE	L1	L1MB5
cg26228024	Simple_repeat	Simple_repeat	(TG)n
cg08642716	DNA	TcMar-Tigger	MER47A
cg04120680	DNA	TcMar-Tigger	MER47A
cg11709254	DNA	TcMar-Tigger	MER47B
cg26537941	LINE	CR1	L3
cg22388607	Low_complexity	Low_complexity	GC_rich
cg12578250	Simple_repeat	Simple_repeat	(CATG)n
cg13800721	Simple_repeat	Simple_repeat	(CATG)n
cg10709432	LINE	L1	L1ME1
cg18936550	SINE	MIR	MIRb
cg10629420	SINE	MIR	MIR
cg19366986	SINE	MIR	MIRc
cg00958381	Simple_repeat	Simple_repeat	(CCCCG)n
cg24544656	LTR	ERVL-MaLR	MLT1D
cg02955098	LTR	ERVL-MaLR	MLT1D
cg12427039	Simple_repeat	Simple_repeat	(TCTCTG)n
cg14421582	LINE	L2	L2b
cg03117540	LINE	L2	L2b
cg12715285	LTR	ERVL	LTR62
cg16515815	DNA	hAT-Charlie	MER5A
cg20769487	SINE	MIR	MIRc
cg09140232	DNA	hAT-Tip100	Arthur1A
cg06762750	LTR	ERVL-MaLR	MLT1D
cg24307703	LTR	ERVK	LTR13
cg20522675	LTR	ERVL	LTR40c
cg02850795	SINE	MIR	MIR
cg24667304	Low_complexity	Low_complexity	GC_rich
cg06650698	LINE	L1	L1ME1
cg07349054	LINE	L1	L1ME1
cg18764372	Simple_repeat	Simple_repeat	(GCGTG)n
cg16395997	DNA	TcMar-Tigger	Tigger7
cg22822803	DNA	hAT	MER53
cg11256802	DNA	hAT	MER53
cg04865841	DNA	hAT	MER53
cg19783114	Low_complexity	Low_complexity	C-rich
cg20768358	LTR	ERV1	MER34C2
cg21827809	LTR	ERV1	MER34C2
cg06830875	LTR	ERV1	MER34C2
cg13943358	LTR	ERV1	MER31-int
cg03568718	LTR	ERV1	MER39
cg27317493	LINE	L2	L2b
cg06996273	DNA	hAT-Charlie	MER33
cg03103850	DNA	hAT-Charlie	MER33
cg19819912	LINE	L2	L2b
cg14912788	LINE	L2	L2a
cg24934561	Low_complexity	Low_complexity	GC_rich
cg02255801	LTR	ERVK	LTR13A
cg22675593	LTR	ERVK	LTR5B
cg07145709	LTR	ERVK	LTR5B
cg15947534	LTR	ERV1	LTR45C
cg08670691	LTR	ERV1	LTR45C
cg10634712	DNA	hAT-Blackjack	MER63A
cg03256904	DNA	TcMar-Tigger	Tigger3d
cg00954161	DNA	TcMar-Tigger	Tigger3d
cg25351920	DNA	TcMar-Tigger	Tigger3d
cg03318469	LTR	ERV1	LTR8A
cg18809873	LTR	ERV1	MER4A
cg22610235	LTR	ERV1	MER4A
cg17519938	LTR	ERV1	MER4A
cg24196422	LTR	ERV1	LTR38-int
cg12551983	LTR	ERVK	HERVK13-int
cg01934638	LTR	ERVK	HERVK13-int
cg14992972	LTR	ERVK	HERVK13-int
cg14264793	LTR	ERVK	HERVK13-int
cg24556754	LTR	ERVK	HERVK13-int
cg21411962	SINE	Alu	AluSx3
cg25729560	LINE	L1	L1MC5
cg06543160	LINE	L1	L1MC5
cg20313677	LINE	L1	L1MC5
cg20808986	LTR	ERVL-MaLR	MLT1C
cg15937266	LINE	L1	L1MD2
cg17002428	SINE	Alu	AluJb
cg00461770	LINE	L1	L1MEe
cg16307399	LINE	L1	L1MEe
cg13335886	LINE	L2	L2b
cg09757127	LINE	L1	L1MC4a
cg16362587	LINE	L1	L1M4b
cg24640609	DNA	TcMar-Tc2	Kanga1a
cg16271823	DNA	TcMar-Tc2	Kanga1a
cg25468905	SINE	MIR	MIRb
cg00647233	SINE	MIR	MIRb
cg16558307	LINE	L2	L2a
cg02293501	LINE	L2	L2a
cg12081443	LINE	L2	L2a
cg04570715	LTR	ERVL	MLT2D
cg17808634	LTR	ERVL-MaLR	MLT1C
cg10310168	LINE	L2	L2
cg17907200	LINE	L1	L1MEe
cg08633745	LTR	ERV1	MER50
cg11193416	LTR	ERV1	MER50
cg01388988	LTR	ERV1	MER50
cg24735225	LTR	ERV1	MER50
cg07248181	LTR	ERV1	MER50
cg09269935	LTR	ERVL-MaLR	MLT1H1
cg16264595	LINE	L2	L2b
cg11735242	LTR	ERVL	MLT2D
cg26840333	Simple_repeat	Simple_repeat	(TG)n
cg04306992	DNA	hAT-Charlie	Charlie4a
cg12475759	Low_complexity	Low_complexity	G-rich
cg26231761	SINE	MIR	MIRc
cg00535618	Simple_repeat	Simple_repeat	(CA)n
cg00562969	LTR	ERV1	MER31A
cg27046117	DNA	TcMar-Tigger	MER82
cg06793402	LTR	ERV1	MER4B
cg11518454	SINE	MIR	MIRc
cg20794208	LTR	ERVL-MaLR	MLT1E3
cg18224977	LTR	ERVL-MaLR	MLT1K
cg16173186	SINE	MIR	MIRb
cg25341687	SINE	MIR	MIRb
cg00500626	LINE	L2	L2b
cg18770052	Simple_repeat	Simple_repeat	(GGGTG)n
cg13944397	LTR	ERVL	LTR41B
cg02011124	LTR	ERVL-MaLR	MLT1K
cg22374924	LINE	L1	L1PA17
cg05041475	SINE	Alu	AluSx3
cg05041475	LINE	L2	L2a
cg04096305	LINE	L2	L2b
cg22012759	SINE	MIR	MIR
cg23619890	SINE	Alu	AluJo
cg12905735	SINE	MIR	MIRc
cg05927645	LINE	L2	L2c
cg15598789	LINE	L1	L1MC4
cg06173758	LINE	L1	L1MC4
cg06616755	LINE	L1	L1MC4
cg08882503	LINE	L1	L1ME3A
cg04557181	LINE	L1	L1ME3A
cg10100287	DNA	hAT-Charlie	Charlie1
cg04898195	DNA	hAT-Charlie	Charlie1a
cg10122302	DNA	hAT-Charlie	Charlie1a
cg13928473	LINE	L1	L1M5
cg22692659	LINE	L1	L1M5
cg24926052	LINE	L1	L1M5
cg26564960	LINE	L1	L1MB3
cg01934408	SINE	MIR	MIRb
cg13614083	SINE	MIR	MIRb
cg24730892	LINE	L2	L2a
cg07220157	SINE	MIR	MIRb
cg03969724	LTR	ERV1	MER51A
cg19902591	SINE	MIR	MIR
cg17179571	LTR	ERVL-MaLR	MLT1D
cg13243674	SINE	MIR	MIR
cg14258756	LINE	L2	L2a
cg05781512	LTR	ERVL-MaLR	MLT1C
cg20993163	DNA	hAT-Tip100	MER45C
cg01335566	SINE	Alu	AluSc
cg21919596	LTR	ERVL-MaLR	MLT1C
cg11069824	SINE	MIR	MIR
cg05793604	Simple_repeat	Simple_repeat	(CA)n
cg12276513	Low_complexity	Low_complexity	GC_rich
cg09271882	Simple_repeat	Simple_repeat	(CCG)n
cg08080029	Low_complexity	Low_complexity	GC_rich
cg06744003	SINE	Alu	AluSx
cg22174623	SINE	Alu	AluSx3
cg27527922	LINE	L2	L2b
cg26935168	DNA	hAT-Charlie	MER5A1
cg08107735	DNA	hAT-Charlie	MER5A1
cg13476932	DNA	hAT-Charlie	MER5A1
cg17153174	LINE	L2	L2b
cg03716999	SINE	Alu	AluSz
cg24870568	SINE	Alu	AluSz
cg26611832	SINE	Alu	AluSx1
cg17992056	SINE	Alu	AluSz
cg27541349	SINE	Alu	AluSz
cg06940574	SINE	Alu	AluY
cg15830682	SINE	Alu	AluJo
cg07480647	Low_complexity	Low_complexity	G-rich
cg06348737	SINE	Alu	FLAM_A
cg04861645	SINE	Alu	AluSq
cg02700833	Low_complexity	Low_complexity	GC_rich
cg04055049	LINE	L2	L2c
cg00057114	SINE	Alu	AluSq2
cg11714702	LINE	CR1	L3
cg24599624	SINE	Alu	AluJr
cg22171613	SINE	Alu	AluSc8
cg12082302	LINE	L1	L1MB7
cg02065192	LINE	L1	L1MB7
cg09513469	LINE	L1	L1MB7
cg18148314	LINE	L1	L1ME1
cg10770046	SINE	Alu	AluJb
cg21267498	LTR	ERV1	LTR12E
cg23370548	LTR	ERVL	HERV16-int
cg24864511	SINE	MIR	MIR3
cg22227104	LINE	L2	L2b
cg00297432	Simple_repeat	Simple_repeat	(CGGGG)n
cg24153044	Low_complexity	Low_complexity	GC_rich
cg10949430	SINE	MIR	MIRb
cg21211780	LINE	L2	L2c
cg10539898	Low_complexity	Low_complexity	GC_rich
cg16681526	SINE	MIR	MIR3
cg04500986	SINE	MIR	MIR3
cg26056577	SINE	Alu	AluSz
cg08489551	SINE	MIR	MIRb
cg12738078	SINE	Alu	AluJb
cg16532223	LINE	L2	L2a
cg12946080	SINE	Alu	AluJr
cg12905865	Low_complexity	Low_complexity	C-rich
cg01665243	SINE	MIR	MIRc
cg09805709	SINE	MIR	MIRb
cg01429933	SINE	MIR	MIRb
cg19919506	Low_complexity	Low_complexity	GC_rich
cg24332389	LINE	L1	L1ME3A
cg22451657	LINE	L1	L1ME3A
cg07181374	LINE	L1	L1ME3A
cg06085726	DNA	hAT-Charlie	MER102b
cg12302560	SINE	Alu	AluJb
cg01566460	LINE	L1	L1PA11
cg21547845	SINE	Alu	AluSx
cg23642826	LINE	L2	L2a
cg01881062	LINE	L1	L1ME3A
cg08653114	SINE	Alu	AluSx
cg04497520	Low_complexity	Low_complexity	C-rich
cg01433443	Low_complexity	Low_complexity	C-rich
cg08661290	Low_complexity	Low_complexity	C-rich
cg19027619	Low_complexity	Low_complexity	GC_rich
cg17121120	Low_complexity	Low_complexity	GC_rich
cg00967405	SINE	Alu	AluJb
cg17946470	LINE	L2	L2a
cg08163621	LINE	L1	L1ME3A
cg18537410	LINE	L2	L2b
cg24361350	SINE	Alu	AluY
cg23040782	SINE	Alu	AluSx
cg03753670	SINE	Alu	AluSx
cg20668607	SINE	Alu	AluSx
cg22709811	SINE	Alu	AluSx
cg12475902	SINE	Alu	AluY
cg14073033	Other	Other	SVA_D
cg15061086	LTR	ERVL-MaLR	MLT1F2
cg25625600	SINE	Alu	AluJo
cg15582707	DNA	hAT-Charlie	Charlie17a
cg04218548	LINE	L2	L2a
cg24117315	LTR	Gypsy	LTR81B
cg09334731	LINE	L2	L2c
cg11680212	LTR	ERVL	MER74A
cg13390385	LINE	L2	L2b
cg00538247	LINE	L2	L2b
cg07008478	LTR	ERVL-MaLR	MLT1C
cg13687594	LTR	ERVL-MaLR	MLT1C
cg24844717	LINE	L2	L2a
cg04215950	LINE	L2	L2b
cg04980002	LINE	L2	L2c
cg10332321	LINE	L2	L2b
cg10511357	LINE	L2	L2
cg03580787	LINE	L1	L1ME2z
cg00665827	LINE	L2	L2c
cg10521808	SINE	MIR	MIRb
cg23110353	SINE	MIR	MIR
cg01550397	LTR	ERVL-MaLR	MLT1C
cg08478799	LINE	L2	L2a
cg25974448	SINE	MIR	MIRb
cg12740180	Low_complexity	Low_complexity	G-rich
cg02275084	SINE	MIR	MIR3
cg06830167	LINE	L2	L2c
cg00353659	LINE	L2	L2a
cg05048057	SINE	MIR	MIRb
cg05708629	SINE	Alu	AluJo
cg25763306	LINE	L2	L2b
cg04128092	LINE	L2	L2a
cg23228279	SINE	MIR	MIRb
cg22361543	SINE	MIR	MIRb
cg09068636	LTR	ERVL-MaLR	MLT1I
cg00067518	LINE	L2	L2c
cg14157073	Low_complexity	Low_complexity	G-rich
cg06082897	SINE	Alu	AluJb
cg17081408	LINE	L2	L2b
cg14993123	Simple_repeat	Simple_repeat	(CCCCG)n
cg07148645	Simple_repeat	Simple_repeat	(CCCCG)n
cg20149362	LINE	L1	L1MB5
cg02277850	LINE	L2	L2b
cg23987789	LINE	L2	L2b
cg05803631	Low_complexity	Low_complexity	G-rich
cg01444397	Low_complexity	Low_complexity	G-rich
cg10059324	LINE	L1	L1MC4a
cg11668188	LINE	L1	L1ME1
cg09938876	LINE	L2	L2
cg12606891	LINE	L2	L2
cg15727920	SINE	Alu	AluJb
cg17861477	SINE	Alu	AluSg
cg13962846	LTR	ERV1	LTR36
cg16117781	LINE	L1	L1ME3B
cg06956444	SINE	MIR	MIRb
cg22677498	SINE	Alu	AluY
cg26118643	SINE	MIR	MIR
cg06619807	SINE	Alu	AluSg7
cg17425224	LINE	L2	L2a
cg15591616	LINE	L1	L1M5
cg27437868	SINE	Alu	AluY
cg04930693	LINE	L2	L2a
cg11426075	Simple_repeat	Simple_repeat	(CGGTG)n
cg21294301	LINE	L2	L2a
cg19698200	DNA	hAT-Charlie	Charlie10
cg20152585	SINE	MIR	MIRb
cg04492086	LTR	ERVL-MaLR	MLT1E3
cg11221318	LTR	ERVL	LTR86A1
cg25606046	SINE	MIR	MIRc
cg05270224	SINE	MIR	MIR3
cg11977919	SINE	MIR	MIRb
cg11283860	SINE	MIR	MIRb
cg04236512	SINE	MIR	MIR
cg16060382	SINE	Alu	AluYa5
cg23768131	LINE	L2	L2a
cg26407930	LINE	L2	L2a
cg26543352	DNA	TcMar-Tigger	MER82
cg06622404	SINE	Alu	AluSq
cg02460223	DNA	hAT-Charlie	MER58B
cg14285937	DNA	hAT-Charlie	MER58B
cg24471980	LINE	L2	L2a
cg05045335	SINE	MIR	MIRb
cg15702277	LINE	L2	L2c
cg09888229	LINE	L2	L2
cg15701149	DNA	hAT?	MamRep1879
cg21774136	LINE	L1	L1MEd
cg13446918	SINE	Alu	AluSg
cg09808028	LTR	ERVL-MaLR	THE1C
cg21268984	SINE	MIR	MIRc
cg23280294	SINE	Alu	AluJr4
cg23963229	LINE	L2	L2b
cg14154131	DNA	TcMar-Tigger	MER47A
cg20325800	SINE	Alu	AluSx
cg11952914	DNA	TcMar-Tigger	Tigger3b
cg15693793	SINE	MIR	MIRc
cg06635351	SINE	Deu	AmnSINE1
cg26401551	LINE	L2	L2
cg12617549	SINE	Alu	AluJb
cg10313368	DNA	PiggyBac	MER85
cg25849281	SINE	Alu	AluY
cg23267872	SINE	Alu	AluY
cg06972019	SINE	Alu	AluSx
cg13432294	SINE	Alu	AluSp
cg08146717	SINE	Alu	AluSx3
cg01002223	LTR	ERV1	HERVFH21-int
cg26529484	LINE	L2	L2
cg00648005	SINE	Alu	AluSx
cg03850198	SINE	Alu	AluJb
cg21272576	SINE	MIR	MIRb
cg24293126	DNA	hAT-Charlie	MER20
cg21689824	LTR	ERV1	MER4C
cg06188496	DNA	TcMar-Tigger	Tigger9a
cg13869484	LINE	L1	L1MB2
cg25602242	LTR	ERV1	MER41E
cg23737366	LTR	ERV1	HERVFH19-int
cg16104584	LTR	ERV1	HERVFH19-int
cg17952939	LTR	ERV1	HERVFH19-int
cg16553238	LTR	ERV1	HERVFH19-int
cg08644511	SINE	MIR	MIRb
cg19863456	LINE	L1	L1M5
cg27178407	Simple_repeat	Simple_repeat	(CCCCG)n
cg12271223	Simple_repeat	Simple_repeat	(CCCCG)n
cg18040436	Simple_repeat	Simple_repeat	(CCCCG)n
cg18131499	Simple_repeat	Simple_repeat	(CCCCG)n
cg03520085	Simple_repeat	Simple_repeat	(CCCCG)n
cg00581848	Simple_repeat	Simple_repeat	(CCCCG)n
cg10108591	LINE	L1	L1MB7
cg11713044	LINE	L1	L1MB7
cg24501230	LTR	ERVL	MLT2C1
cg16102739	SINE	Alu	AluSz6
cg16552153	SINE	Alu	AluSq2
cg14200357	SINE	Alu	AluSx1
cg05933510	SINE	MIR	MIR3
cg20305595	SINE	Alu	AluJb
cg22601917	SINE	MIR	MIR
cg25017777	LINE	L2	L2a
cg10526795	SINE	Alu	AluSx1
cg23914842	SINE	Alu	AluSx1
cg16411216	Low_complexity	Low_complexity	C-rich
cg12458866	Low_complexity	Low_complexity	GC_rich
cg11413763	LINE	L2	L2b
cg02281006	LINE	L2	L2
cg11518950	SINE	MIR	MIR
cg14164492	LINE	L2	L2b
cg18114129	SINE	MIR	MIRb
cg03003073	LINE	L2	L2a
cg01065278	LTR	ERVL-MaLR	MLT1B
cg00772959	SINE	MIR	MIRb
cg07555350	LINE	L1	L1MC1
cg13560914	SINE	MIR	MIRb
cg02360478	SINE	Alu	AluSx
cg13557160	SINE	Alu	AluSx
cg11826452	SINE	Alu	AluSx
cg18783781	SINE	Alu	AluSx
cg02252265	SINE	Alu	AluY
cg26114570	SINE	Alu	AluY
cg08886482	Low_complexity	Low_complexity	GC_rich
cg02206861	Simple_repeat	Simple_repeat	(CCTG)n
cg13385114	DNA	hAT-Charlie	MER58A
cg02769743	SINE	MIR	MIR
cg03413303	SINE	MIR	MIRb
cg21643298	SINE	Alu	AluYa5
cg16014412	SINE	MIR	MIRb
cg12224834	LTR	ERV1	MER57C1
cg04162034	LTR	ERV1	MER34C2
cg16037569	LTR	ERV1	MER34C2
cg12763118	LTR	ERV1	MER34C2
cg14989202	SINE	Alu	AluSz
cg16597045	SINE	Alu	AluSz
cg11334709	SINE	Alu	AluSx
cg22595920	SINE	Alu	AluSx
cg07315642	SINE	Alu	AluJb
cg03653801	Simple_repeat	Simple_repeat	(TG)n
cg16512854	LINE	L1	HAL1
cg13457410	LINE	CR1	L3
cg22427575	SINE	Alu	AluY
cg24060317	SINE	Alu	FLAM_C
cg27553947	DNA	hAT-Charlie	MER58B
cg12856855	LTR	ERVL-MaLR	MSTB1
cg00996875	SINE	Alu	AluSp
cg07589991	LINE	L1	L1MB3
cg23261073	LINE	L2	L2a
cg24691879	SINE	MIR	MIRb
cg11581248	SINE	MIR	MIRb
cg05750598	LINE	L1	L1MC4a
cg22861669	SINE	MIR	MIR
cg24086140	LINE	L2	L2a
cg02833588	LINE	L2	L2a
cg10232889	Simple_repeat	Simple_repeat	(CAG)n
cg00533749	SINE	Alu	AluSq
cg14844138	LINE	L1	L1M5
cg01051698	LINE	L2	L2a
cg16050974	Simple_repeat	Simple_repeat	(TCCG)n
cg07224455	SINE	Alu	AluSx
cg09355820	SINE	Alu	AluY
cg09852008	Low_complexity	Low_complexity	GC_rich
cg02974126	Low_complexity	Low_complexity	GC_rich
cg18563336	Low_complexity	Low_complexity	GC_rich
cg03649796	LTR	ERVL-MaLR	MLT1J-int
cg01415937	LINE	L2	L2a
cg12614519	LINE	L1	L1ME3C
cg05390356	LINE	L2	L2a
cg26856604	DNA	hAT-Charlie	MER58A
cg00147627	LINE	L1	L1M4
cg13938663	DNA	hAT-Charlie	Charlie1b
cg25013184	SINE	Alu	AluSp
cg19400780	Low_complexity	Low_complexity	GC_rich
cg07166784	SINE	Alu	AluSc8
cg00162421	SINE	Alu	AluSc8
cg21534788	SINE	MIR	MIR
cg20482658	SINE	Alu	AluJb
cg08846221	SINE	Alu	AluJr
cg23975251	SINE	MIR	MIRc
cg23072051	LINE	L2	L2c
cg04110886	LINE	L1	L1M5
cg26362368	LINE	L1	L1M5
cg21295222	LINE	L2	L2b
cg24929966	Simple_repeat	Simple_repeat	(CA)n
cg12631000	SINE	MIR	MIR
cg17221941	LINE	L2	L2b
cg11222217	Low_complexity	Low_complexity	C-rich
cg00925802	Low_complexity	Low_complexity	C-rich
cg12760995	DNA	hAT-Charlie	Charlie1a
cg15622917	LINE	L2	L2c
cg13681765	SINE	MIR	MIR3
cg24504936	SINE	MIR	MIRb
cg21285062	SINE	MIR	MIRb
cg18232828	SINE	MIR	MIRb
cg16238819	Simple_repeat	Simple_repeat	(TG)n
cg23723903	Simple_repeat	Simple_repeat	(CTCG)n
cg15063715	SINE	Alu	FLAM_C
cg04944659	SINE	MIR	MIRb
cg03648215	LINE	L2	L2c
cg17903627	Low_complexity	Low_complexity	C-rich
cg26426938	DNA	hAT	MER96B
cg04015962	LINE	L2	L2b
cg08635489	LINE	L2	L2a
cg00157638	SINE	MIR	MIRb
cg20980926	SINE	MIR	MIR
cg04224025	LINE	L1	L1MB3
cg13981325	SINE	MIR	MIRc
cg05304461	DNA	hAT-Blackjack	MER81
cg22499381	SINE	Alu	AluSz6
cg24412659	SINE	Alu	AluJr
cg15387278	SINE	Alu	AluSq2
cg22337407	Simple_repeat	Simple_repeat	(CA)n
cg18163627	SINE	Alu	AluSz6
cg24304050	LINE	L1	HAL1
cg13432010	SINE	Alu	AluSg
cg03303757	Low_complexity	Low_complexity	GC_rich
cg07190630	SINE	Alu	FLAM_A
cg22730007	LINE	L1	L1MC4
cg00997327	LINE	L2	L2a
cg12100376	LINE	L2	L2a
cg10315903	SINE	Alu	AluSx
cg11858029	SINE	Alu	AluJr4
cg18878219	LTR	ERV1	MER50
cg26229593	DNA	hAT-Blackjack	MER63C
cg15800786	Low_complexity	Low_complexity	C-rich
cg07035242	LINE	L2	L2a
cg24556854	SINE	Alu	AluSp
cg26145096	Simple_repeat	Simple_repeat	(TG)n
cg07138192	SINE	Alu	AluSz6
cg24937877	LTR	ERVL	ERV3-16A3_I-int
cg18216918	DNA	TcMar-Tigger	Tigger3a
cg03514188	DNA	TcMar-Tigger	Tigger3a
cg02338965	LTR	ERVL-MaLR	MLT1D
cg17282688	SINE	MIR	MIR
cg00254771	LINE	L2	L2c
cg13434312	SINE	MIR	MIRb
cg00951310	LINE	L2	L2b
cg10808710	LTR	ERVL-MaLR	MLT1C
cg22016747	LINE	L2	L2a
cg04872402	LINE	CR1	L3
cg24878594	LINE	L2	L2a
cg15746187	SINE	MIR	MIR
cg01554529	LTR	ERVL-MaLR	THE1D
cg07789904	SINE	MIR	MIR
cg06084702	SINE	Alu	AluSz
cg09932135	SINE	MIR	MIRb
cg24117376	Low_complexity	Low_complexity	GC_rich
cg08275633	Low_complexity	Low_complexity	GC_rich
cg02334370	Simple_repeat	Simple_repeat	(CCCCG)n
cg26669624	SINE	MIR	MIRc
cg02567879	SINE	MIR	MIRc
cg13807035	LTR	ERVL	ERV3-16A3_LTR
cg26437845	LINE	L1	L1MC2
cg24724832	LINE	L1	L1MC2
cg14262374	SINE	MIR	MIRb
cg18285337	DNA	hAT-Charlie	MER58B
cg04444949	LTR	ERV1	MER31B
cg19251740	Simple_repeat	Simple_repeat	(CGGGG)n
cg06322619	Simple_repeat	Simple_repeat	(CGGGG)n
cg16429182	LINE	L2	L2a
cg18276943	SINE	Alu	AluJb
cg15473314	Simple_repeat	Simple_repeat	(TG)n
cg07563063	SINE	MIR	MIRb
cg15543027	LINE	L2	L2c
cg22340067	DNA	TcMar-Mariner	HSMAR1
cg05802658	DNA	hAT-Charlie	MER1B
cg03532363	Simple_repeat	Simple_repeat	(CCCCG)n
cg22498982	Simple_repeat	Simple_repeat	(CCCCG)n
cg01005303	SINE	MIR	MIRb
cg01061626	Simple_repeat	Simple_repeat	(CCG)n
cg11345438	Simple_repeat	Simple_repeat	(CCG)n
cg07603449	SINE	Alu	AluSg
cg10438121	SINE	Alu	AluJo
cg11469137	SINE	MIR	MIR
cg26145832	SINE	MIR	MIR
cg05132283	SINE	MIR	MIR
cg23286660	SINE	MIR	MIR3
cg10803903	SINE	MIR	MIR
cg15603548	LTR	ERVL-MaLR	MLT1K
cg14089603	SINE	Alu	AluSx
cg06967016	SINE	Alu	AluJr
cg09216381	DNA	hAT-Charlie	MER103C
cg03939566	LTR	ERV1	LTR51
cg02156723	LTR	ERV1	LTR64
cg19940644	LINE	L2	L2b
cg17482935	SINE	MIR	MIRb
cg05036439	SINE	Alu	AluSq2
cg22428027	LINE	CR1	L3
cg03422094	LTR	ERVL-MaLR	MLT1D
cg25382900	SINE	MIR	MIR
cg08547922	LTR	ERVL-MaLR	MLT1G3
cg09471658	LTR	ERVL	LTR41B
cg14712983	SINE	MIR	MIRb
cg07707505	SINE	MIR	MIR
cg00463840	SINE	MIR	MIRb
cg18152455	SINE	MIR	MIRb
cg07017532	LINE	L2	L2b
cg24941292	LINE	L2	L2b
cg21393163	LINE	L1	L1M5
cg00566331	LINE	L1	L1ME3C
cg16549957	LINE	L1	L1ME3C
cg23990236	LINE	L2	L2a
cg20300911	DNA	hAT-Charlie	MER117
cg00175403	LINE	L2	L2c
cg09081517	SINE	Alu	AluJr
cg11844927	DNA	hAT-Charlie	MER20
cg22677556	SINE	MIR	MIR
cg13386839	SINE	Alu	AluSx1
cg17428954	SINE	Alu	AluSz6
cg15208519	SINE	MIR	MIR
cg11665613	SINE	Alu	FRAM
cg23843705	LINE	L2	L2a
cg08531380	LINE	L2	L2a
cg03208707	DNA	hAT-Charlie	MER33
cg21869913	LINE	L2	L2a
cg11401218	LINE	L2	L2a
cg05774892	LTR	ERVL	MER21C
cg20803931	SINE	Alu	AluSp
cg20610749	LINE	L2	L2c
cg22866430	LINE	CR1	L3
cg08055132	DNA	hAT-Charlie	MER33
cg24674193	LTR	ERVL	LTR33
cg19760666	LINE	L1	L1MB8
cg26933021	LINE	L1	L1MB8
cg05230551	LINE	L2	L2a
cg09126203	LTR	ERVL-MaLR	MLT1K
cg17985555	SINE	Alu	AluSx
cg15895132	SINE	MIR	MIR
cg24505274	SINE	Alu	AluSp
cg04505750	SINE	MIR	MIR
cg19620994	DNA	hAT-Charlie	MER20
cg26433816	LINE	L2	L2a
cg18839416	SINE	MIR	MIR
cg04488453	SINE	Alu	AluSc8
cg01549226	LTR	ERV1	LTR44
cg00295060	SINE	Alu	AluSc8
cg26811976	SINE	Alu	AluSx3
cg21942701	SINE	Alu	AluSx1
cg24274354	SINE	Alu	AluJb
cg23084506	SINE	Alu	AluSx1
cg10240587	SINE	Alu	AluJb
cg15667219	SINE	Alu	AluJb
cg21410132	SINE	Alu	AluJb
cg05753486	DNA	hAT-Tip100	MER115
cg02911408	SINE	Alu	AluSx
cg18229396	LINE	L2	L2a
cg19411734	LINE	L1	L1MEd
cg26341058	SINE	Alu	AluSx3
cg06949728	SINE	MIR	MIRc
cg17840367	LTR	ERV1	HERVIP10FH-int
cg11677705	LTR	ERV1	HERVIP10FH-int
cg22155914	LTR	ERV1	HERVIP10FH-int
cg07967531	LTR	ERV1	LTR51
cg21158795	SINE	Alu	AluJo
cg20464068	LINE	L2	L2
cg01816014	Simple_repeat	Simple_repeat	(TG)n
cg19324313	SINE	Alu	AluSg
cg14093474	SINE	MIR	MIR
cg06807086	LINE	L2	L2a
cg07552723	SINE	Alu	AluSg
cg24715767	LTR	ERVL-MaLR	MLT1A
cg19705300	LTR	ERVL-MaLR	MLT1A
cg11135988	LTR	ERVL-MaLR	MLT1A0
cg17272571	SINE	MIR	MIR3
cg07415947	LTR	ERV1	LTR12C
cg03523254	LINE	L2	L2b
cg16164607	SINE	MIR	MIRb
cg04145937	LINE	L1	L1MEc
cg27573298	DNA	hAT-Charlie	MER5A
cg26407034	LTR	ERV1	LTR9
cg20297940	LTR	ERV1	LTR12C
cg17451046	LTR	ERV1	LTR12C
cg23618179	LTR	ERV1	LTR12C
cg26353598	LTR	ERVL	LTR33
cg00980060	LTR	Gypsy	MamGypLTR1a
cg17897187	SINE	tRNA	MamSINE1
cg10228777	Low_complexity	Low_complexity	GC_rich
cg15118606	LINE	L2	L2b
cg18229556	SINE	Alu	AluY
cg22507727	LTR	ERVL	MER74B
cg22386492	DNA	hAT-Charlie	MER119
cg09137204	DNA	hAT-Charlie	MER5A1
cg06887407	LTR	ERVL	LTR16A2
cg25282951	DNA	hAT-Charlie	MER102b
cg19260606	SINE	MIR	MIRb
cg01567509	LTR	ERV1	MER41B
cg27538859	LINE	L2	L2b
cg26296524	SINE	MIR	MIRb
cg04706087	LINE	L1	L1MB7
cg22853601	SINE	MIR	MIRb
cg21102678	Simple_repeat	Simple_repeat	(CATCG)n
cg05046721	SINE	MIR	MIR
cg20299399	DNA	hAT-Charlie	MER102b
cg13502395	DNA	hAT-Charlie	MER5A
cg24943198	SINE	MIR	MIRb
cg09274167	LINE	L2	L2b
cg18865535	LINE	L2	L2b
cg08237695	LINE	L2	L2b
cg08468082	SINE	MIR	MIRb
cg03770523	SINE	Alu	AluJb
cg24425531	DNA	TcMar-Tigger	Tigger2a
cg20675796	LINE	L1	L1MB7
cg05626309	LINE	L1	L1MC4a
cg14219262	SINE	MIR	MIRb
cg10206452	SINE	MIR	MIRc
cg13865360	LINE	L1	L1ME3C
cg10989683	LINE	L2	L2a
cg22453656	SINE	MIR	MIRb
cg21913886	DNA	hAT-Charlie	MER112
cg09249173	DNA	hAT-Blackjack	MER63A
cg06124883	SINE	Alu	AluSx1
cg17750038	SINE	MIR	MIR
cg02394978	SINE	MIR	MIR
cg17944001	SINE	Alu	AluY
cg06536159	Unknown	Unknown	MamRep564
cg03055021	LTR	ERVL-MaLR	MLT1D
cg06207778	LINE	CR1	L3
cg11395890	SINE	Alu	AluJo
cg27333269	DNA	hAT?	MamRep1879
cg07160540	SINE	MIR	MIRc
cg08107352	SINE	Alu	AluJo
cg18917957	SINE	MIR	MIRb
cg23064554	SINE	MIR	MIRb
cg19505194	SINE	Alu	AluSz
cg20153829	LTR	ERVK	LTR13A
cg04725029	Low_complexity	Low_complexity	C-rich
cg20798872	Low_complexity	Low_complexity	C-rich
cg00052626	Low_complexity	Low_complexity	C-rich
cg25154447	Low_complexity	Low_complexity	C-rich
cg25019631	Low_complexity	Low_complexity	C-rich
cg11404049	Low_complexity	Low_complexity	C-rich
cg18271071	SINE	MIR	MIRb
cg25737788	SINE	MIR	MIR3
cg26884180	LINE	L2	L2a
cg15568998	SINE	Alu	AluSx
cg21288716	SINE	MIR	MIR
cg17759086	Low_complexity	Low_complexity	GC_rich
cg00894481	SINE	Alu	FRAM
cg05141711	SINE	Alu	FRAM
cg03950923	LTR	ERV1	LTR12D
cg07574854	SINE	Alu	AluSx3
cg25136294	LINE	L1	L1MEc
cg10090241	SINE	MIR	MIR
cg03420670	SINE	MIR	MIRb
cg14202768	SINE	MIR	MIRb
cg14202768	LINE	L2	L2c
cg03042802	SINE	Alu	AluSp
cg24397692	SINE	Alu	AluSp
cg26049379	LINE	L2	L2c
cg07846167	SINE	MIR	MIRb
cg01709096	SINE	MIR	MIRb
cg08258719	SINE	MIR	MIR
cg18412185	SINE	Alu	AluJo
cg11650974	SINE	Alu	AluJb
cg03728499	SINE	Alu	AluSx
cg21570493	SINE	Alu	AluSx3
cg26058971	SINE	Alu	AluSp
cg06640695	LINE	L2	L2a
cg08643472	Low_complexity	Low_complexity	C-rich
cg07810927	Low_complexity	Low_complexity	C-rich
cg00978570	LINE	L2	L2
cg17445557	SINE	Alu	FLAM_A
cg03338185	LINE	L1	L1PB1
cg05153550	LTR	ERVL	HERVL-int
cg06624244	SINE	Alu	AluJb
cg14529268	LINE	L2	L2a
cg13081498	SINE	MIR	MIRb
cg13320181	SINE	MIR	MIRb
cg24306962	SINE	MIR	MIRb
cg11528029	SINE	MIR	MIRb
cg16591681	SINE	MIR	MIRb
cg02634641	SINE	MIR	MIRb
cg20320574	SINE	MIR	MIRb
cg13358262	SINE	Alu	AluJr
cg17156402	LINE	L2	L2
cg18279134	SINE	MIR	MIR3
cg22711082	SINE	MIR	MIRb
cg22852013	Simple_repeat	Simple_repeat	(CA)n
cg21853568	SINE	MIR	MIRc
cg24879614	SINE	MIR	MIR
cg08869231	SINE	Alu	AluSq
cg15152789	SINE	Alu	AluSz
cg03258665	SINE	MIR	MIRb
cg09414948	LINE	L2	L2a
cg20312132	SINE	MIR	MIRb
cg10579941	LINE	L1	L1ME3A
cg20281040	Low_complexity	Low_complexity	C-rich
cg02298360	Low_complexity	Low_complexity	GC_rich
cg01719793	Low_complexity	Low_complexity	GC_rich
cg08929791	SINE	MIR	MIR
cg00068433	DNA	TcMar-Tigger	MER2
cg04158049	LINE	L2	L2a
cg17463745	SINE	MIR	MIR
cg05123974	LTR	ERVL-MaLR	MLT1J1
cg16380888	SINE	MIR	MIR
cg03516026	SINE	MIR	MIRb
cg15386069	SINE	Alu	AluJb
cg23281809	SINE	MIR	MIRc
cg10623389	SINE	MIR	MIRb
cg03978675	SINE	MIR	MIRb
cg03586820	LTR	ERV1	MER4B
cg02671063	SINE	Alu	AluJo
cg09234164	SINE	Alu	AluSc
cg10308193	SINE	Alu	AluSx
cg15553418	SINE	MIR	MIRb
cg20433455	LINE	L2	L2c
cg15696407	SINE	MIR	MIRb
cg16384864	LINE	L2	L2a
cg17420395	SINE	Alu	AluSz
cg02440562	SINE	MIR	MIRc
cg23213892	LINE	L2	L2c
cg20815571	LINE	L2	L2c
cg00694324	LINE	L1	L1MB4
cg13864749	SINE	Alu	AluSx
cg22730636	SINE	MIR	MIRb
cg12765138	SINE	Alu	AluSx
cg07509199	LTR	ERV1	LTR2
cg08715988	SINE	Alu	AluSg7
cg06538888	SINE	Alu	AluSx
cg04777112	LTR	ERV1	LTR49
cg27568983	SINE	Alu	AluSz
cg12918271	tRNA	tRNA	tRNA-Glu-GAA
cg23804649	LINE	L1	L1M5
cg06649681	SINE	Alu	AluSx3
cg26022684	SINE	Alu	AluSg
cg09936572	LINE	L1	L1MC2
cg08135460	LINE	L2	L2b
cg12387865	LINE	L1	L1ME2z
cg24698881	SINE	MIR	MIRb
cg22732055	SINE	MIR	MIRb
cg11516038	SINE	Alu	AluJb
cg12442246	tRNA	tRNA	tRNA-Gly-GGG
cg13486430	tRNA	tRNA	tRNA-Gly-GGG
cg09158015	tRNA	tRNA	tRNA-Gly-GGG
cg02976036	SINE	MIR	MIRc
cg10335333	LINE	L2	L2b
cg15015518	DNA	hAT	MER53
cg20163959	SINE	MIR	MIRb
cg12992554	SINE	MIR	MIRb
cg27302863	SINE	Alu	AluJb
cg14156905	LTR	ERV1	MER49
cg23107144	LTR	ERVL-MaLR	THE1A
cg13178798	LINE	L2	L2
cg20168927	tRNA	tRNA	tRNA-Glu-GAA
cg10483475	LTR	ERV1	LTR49-int
cg26541649	tRNA	tRNA	tRNA-Asn-AAC
cg26152427	LTR	ERVL	LTR75B
cg24678241	LTR	ERV1	MER87
cg24607814	DNA	hAT-Charlie	Charlie4a
cg10315945	LINE	L1	L1MEc
cg13866204	SINE	MIR	MIRb
cg24723044	SINE	Alu	AluSq2
cg15209908	SINE	MIR	MIRb
cg04558298	DNA	hAT-Tip100	MER91B
cg12856965	SINE	MIR	MIR
cg04339882	LTR	ERVL	LTR53
cg27582013	SINE	MIR	MIR
cg00053536	SINE	Alu	AluSx
cg01783960	LTR	ERVL-MaLR	MLT1K
cg03394122	SINE	Alu	FLAM_C
cg08477744	LINE	L2	L2b
cg12695612	LTR	ERV1	LTR64
cg17744878	LTR	ERV1	LTR64
cg19306948	LTR	ERV1	LTR64
cg10201923	LTR	ERV1	LTR64
cg16603059	LTR	ERV1	LTR64
cg18679190	LTR	ERV1	LTR64
cg05064739	LTR	ERVL	LTR16C
cg16027378	SINE	MIR	MIRb
cg22219083	SINE	MIR	MIRb
cg11192270	SINE	MIR	MIRb
cg02918893	SINE	MIR	MIRb
cg20822990	SINE	Alu	AluSp
cg06953703	LINE	L2	L2a
cg24058669	LINE	L2	L2b
cg17851440	SINE	Alu	FAM
cg13201187	SINE	Alu	AluSq
cg10987625	SINE	MIR	MIRc
cg16696648	LINE	L2	L2b
cg07233838	SINE	Alu	AluSc
cg00924685	SINE	MIR	MIR3
cg08862373	LTR	ERVL-MaLR	MSTA-int
cg16430862	LINE	L2	L2a
cg24629232	LINE	L2	L2a
cg24934408	LINE	L2	L2a
cg21208518	LINE	L2	L2a
cg17502536	SINE	MIR	MIRc
cg24724618	LINE	L2	L2b
cg00954039	LINE	CR1	L3
cg23232880	SINE	MIR	MIRb
cg23213951	SINE	MIR	MIRb
cg10778072	LINE	L2	L2b
cg08464855	SINE	Alu	AluY
cg11534596	SINE	MIR	MIR
cg06878808	DNA	hAT-Charlie	MER5A
cg17719543	SINE	MIR	MIR3
cg03513388	SINE	MIR	MIR
cg17747053	SINE	MIR	MIRb
cg00702325	LINE	L2	L2a
cg00298399	SINE	Alu	AluJb
cg13879177	SINE	Alu	AluJb
cg07677446	SINE	MIR	MIRb
cg07319613	LINE	L2	L2a
cg18941796	Low_complexity	Low_complexity	GC_rich
cg13947949	Low_complexity	Low_complexity	GC_rich
cg23913963	LINE	L2	L2c
cg01713950	LINE	L2	L2c
cg06769739	LINE	L1	L1MEc
cg04868734	DNA	hAT-Charlie	MER1B
cg20940024	SINE	Alu	AluSx1
cg12420209	SINE	MIR	MIR3
cg09674998	SINE	Alu	AluSx1
cg00330455	SINE	MIR	MIRb
cg06980341	SINE	MIR	MIR
cg08947790	SINE	MIR	MIRb
cg22491111	LTR	ERVL-MaLR	MLT1A0
cg20143528	SINE	MIR	MIR
cg10513862	SINE	MIR	MIR
cg13788381	SINE	MIR	MIR
cg20294080	SINE	MIR	MIRb
cg16367786	SINE	MIR	MIR
cg07224918	SINE	MIR	MIRb
cg12623625	DNA	hAT-Charlie	MER20
cg26218809	SINE	MIR	MIR3
cg21524424	LINE	L1	L1MB3
cg26863563	LINE	L2	L2
cg27304549	LINE	L2	L2
cg21696055	LINE	L2	L2b
cg15901550	LINE	L2	L2b
cg06959664	SINE	MIR	MIRb
cg13299927	DNA	hAT-Charlie	MER3
cg09076010	LINE	L2	L2c
cg07194152	SINE	MIR	MIR
cg09941542	SINE	Alu	AluJo
cg06687562	LTR	ERVL	LTR41
cg19685066	LTR	ERVL	LTR41
cg08734527	SINE	MIR	MIRc
cg24738993	LTR	ERV1	LTR78
cg04139043	SINE	MIR	MIR3
cg16171105	SINE	MIR	MIR
cg20945232	RC	Helitron	Helitron1Na_Mam
cg18150469	LINE	L2	L2b
cg13062888	SINE	MIR	MIRb
cg26910132	SINE	MIR	MIRb
cg20697066	LINE	CR1	Plat_L3
cg12907295	LINE	L2	L2a
cg23349790	Simple_repeat	Simple_repeat	(CCG)n
cg09025393	LINE	L2	L2b
cg24000241	SINE	MIR	MIR3
cg18106186	LINE	L2	L2a
cg05335953	SINE	MIR	MIR
cg15673188	SINE	MIR	MIR3
cg05945425	SINE	Alu	AluSg
cg26818821	SINE	MIR	MIRc
cg01083050	SINE	MIR	MIRc
cg12547943	SINE	MIR	MIRc
cg27451581	SINE	MIR	MIR
cg20706909	DNA	hAT-Charlie	MER117
cg10632728	SINE	MIR	MIRb
cg17172851	Simple_repeat	Simple_repeat	(TCC)n
cg18217175	Low_complexity	Low_complexity	G-rich
cg05763032	SINE	MIR	MIRc
cg26530301	LINE	L2	L2a
cg22707207	SINE	MIR	MIRb
cg21856670	SINE	MIR	MIR
cg14826624	LINE	CR1	L3
cg04977858	SINE	MIR	MIR
cg20685067	SINE	MIR	MIRc
cg08440572	SINE	MIR	MIRc
cg08655330	SINE	MIR	MIRc
cg03960908	SINE	Alu	AluSx3
cg15605096	DNA	hAT-Tip100	MER91A
cg23206822	LINE	L2	L2a
cg15743657	SINE	MIR	MIR
cg21731286	SINE	MIR	MIR
cg02058944	SINE	Alu	AluSx
cg26791665	SINE	MIR	MIRb
cg26933869	LTR	ERV1	MER90
cg21471199	LTR	ERV1	MER90
cg20632537	LINE	L2	L2b
cg23028755	LINE	L2	L2b
cg09012001	DNA	hAT-Charlie	MER5A1
cg05626128	SINE	MIR	MIRb
cg10992634	SINE	MIR	MIRb
cg16360668	SINE	MIR	MIR3
cg03939132	LINE	L2	L2b
cg17859655	SINE	Alu	AluSq2
cg24405951	LTR	Gypsy?	LTR88a
cg16128865	SINE	MIR	MIRb
cg13990487	LINE	L2	L2
cg06706670	LINE	L2	L2b
cg24071927	DNA	hAT-Charlie	MER102a
cg23926367	DNA	TcMar-Tigger	Tigger3b
cg16103595	DNA	hAT-Tip100	MER45A
cg18931421	DNA	hAT-Tip100	MER45A
cg04896191	LINE	L2	L2a
cg05704942	SINE	MIR	MIRb
cg07312601	DNA	hAT-Charlie	MER20
cg24328054	SINE	Alu	AluSz
cg17457418	LINE	L1	L1MB7
cg23260966	SINE	Alu	AluSz6
cg13555004	SINE	Alu	AluSz
cg26573807	LINE	L2	L2b
cg18199495	SINE	Alu	AluSz
cg11749059	SINE	MIR	MIRc
cg01071440	LINE	L2	L2c
cg07573717	SINE	MIR	MIRb
cg10981111	SINE	MIR	MIRb
cg21410100	DNA	hAT-Charlie	Charlie1
cg27331277	DNA	TcMar-Tigger	Tigger7
cg04124888	SINE	MIR	MIRb
cg11335264	SINE	MIR	MIRb
cg15624109	SINE	Alu	AluY
cg08233218	LINE	L2	L2c
cg12467595	LINE	L2	L2c
cg06745965	SINE	Alu	AluJr4
cg15930811	DNA	TcMar-Tigger	MER2
cg21789695	SINE	MIR	MIR
cg13422830	SINE	MIR	MIRb
cg02956519	SINE	Alu	AluJr
cg13245440	LINE	L2	L2b
cg01791421	LINE	L2	L2a
cg22626525	DNA	hAT-Tip100	MER91C
cg05776630	SINE	MIR	MIR
cg06871525	LINE	L2	L2c
cg21615127	SINE	MIR	MIRc
cg20993090	LINE	L2	L2b
cg03422757	SINE	Alu	AluSx1
cg15505276	Unknown	Unknown	MamRep605
cg16021223	LTR	ERV1	MER4A1
cg12394941	LTR	ERV1	LTR9
cg15602420	LTR	ERV1	LTR9
cg18852464	DNA	hAT-Blackjack	MER81
cg09550558	SINE	MIR	MIRb
cg10016004	SINE	Alu	AluJr
cg12082793	LINE	L2	L2c
cg24613957	SINE	MIR	MIRc
cg00573165	SINE	MIR	MIR
cg10812684	DNA	hAT-Tip100	ORSL
cg11037787	LTR	Gypsy	MamGyp-int
cg22611120	LTR	ERVL-MaLR	MLT1C
cg11253122	LINE	L2	L2b
cg19258366	LTR	ERV1	LTR46
cg11788598	LTR	ERVL	LTR16A1
cg05048624	SINE	MIR	MIRc
cg22023448	LINE	L1	L1ME4a
cg07142319	LINE	L1	L1ME4a
cg26816312	SINE	Alu	AluSg7
cg18881992	SINE	Alu	AluSg7
cg16087263	LTR	ERV1	MER31A
cg09851650	LTR	ERV1	MER31A
cg21546132	LTR	ERV1	MER31A
cg11177550	SINE	MIR	MIR3
cg14076231	LTR	ERV1	LTR2C
cg25009258	LTR	ERV1	LTR2C
cg19257942	LTR	ERV1	HERVE-int
cg01063509	LINE	L1	L1M5
cg16691196	DNA	TcMar-Tigger	Tigger15a
cg07792006	SINE	Alu	AluJb
cg10945131	LTR	ERVL-MaLR	MLT1H
cg05696034	LTR	Gypsy?	LTR88b
cg16713551	SINE	MIR	MIR
cg16965374	SINE	MIR	MIRb
cg17903275	SINE	MIR	MIRb
cg15677883	SINE	MIR	MIR3
cg27589582	SINE	MIR	MIR3
cg23039636	LINE	L2	L2c
cg02873528	SINE	MIR	MIR
cg07596568	LINE	L2	L2a
cg13904704	LINE	L2	L2a
cg08722591	SINE	MIR	MIRb
cg04415114	SINE	MIR	MIR3
cg20270882	LINE	L2	L2b
cg23635546	SINE	MIR	MIRc
cg24901609	LINE	L1	L1MC3
cg02951739	SINE	MIR	MIRc
cg13401911	Low_complexity	Low_complexity	G-rich
cg08061330	Low_complexity	Low_complexity	G-rich
cg19283960	Low_complexity	Low_complexity	GC_rich
cg24294857	Low_complexity	Low_complexity	GC_rich
cg23814214	LINE	L2	L2a
cg26370078	SINE	MIR	MIRb
cg23109649	LINE	L2	L2a
cg06965071	SINE	MIR	MIRb
cg05384075	SINE	MIR	MIRb
cg26880777	SINE	MIR	MIRb
cg17543296	Low_complexity	Low_complexity	GC_rich
cg13164309	LTR	ERVL-MaLR	MLT1H2
cg00750606	LINE	L2	L2a
cg20619374	SINE	MIR	MIR3
cg06984156	LTR	ERVL-MaLR	MLT1A-int
cg17900103	DNA	hAT-Charlie	MER58A
cg14832490	LTR	ERV1	MER4D
cg17183232	LTR	ERVL	LTR47A
cg20694964	SINE	Alu	AluSz6
cg14452549	LTR	ERVL	LTR47A
cg17508639	SINE	MIR	MIR
cg25108841	Low_complexity	Low_complexity	GC_rich
cg14151682	Low_complexity	Low_complexity	GC_rich
cg00002028	Simple_repeat	Simple_repeat	(CGG)n
cg12446953	SINE	MIR	MIRb
cg24455365	LTR	ERVL	MLT2D
cg14519150	DNA	hAT-Charlie	MER113
cg08248330	SINE	Alu	AluJr
cg07246798	SINE	MIR	MIRc
cg24730688	SINE	Alu	AluJr
cg14035553	LINE	L2	L2c
cg12459000	LTR	ERV1	LTR64
cg03432774	LINE	L1	L1M5
cg03626238	SINE	MIR	MIR
cg05653329	LINE	L2	L2c
cg04123845	Low_complexity	Low_complexity	G-rich
cg02097443	Low_complexity	Low_complexity	G-rich
cg00259367	SINE	MIR	MIR3
cg16172837	SINE	MIR	MIRb
cg04923513	SINE	MIR	MIRb
cg01774477	SINE	Alu	AluJo
cg07603881	SINE	MIR	MIRc
cg24849108	SINE	Alu	AluSx
cg13228952	LTR	ERVL-MaLR	MSTB
cg18436758	Low_complexity	Low_complexity	GC_rich
cg20613337	Low_complexity	Low_complexity	GC_rich
cg05780577	Low_complexity	Low_complexity	C-rich
cg26572042	Low_complexity	Low_complexity	C-rich
cg06916620	DNA	TcMar-Tigger	MER44A
cg13093023	SINE	MIR	MIRb
cg16898219	SINE	Alu	AluJb
cg22600610	LINE	L2	L2
cg11157611	SINE	Alu	AluSx
cg06878749	LINE	L2	L2a
cg12037641	LINE	L2	L2a
cg07114751	SINE	MIR	MIRb
cg07133269	SINE	MIR	MIRb
cg17850498	DNA	hAT-Tip100	MER91A
cg13562122	SINE	MIR	MIRb
cg01780990	SINE	MIR	MIRb
cg22077962	SINE	Alu	AluSx1
cg09232430	Low_complexity	Low_complexity	GC_rich
cg26348226	DNA	hAT-Charlie	Charlie4z
cg20015787	SINE	Alu	AluSz
cg01977520	SINE	Alu	AluSz
cg17445490	SINE	MIR	MIRb
cg13212362	SINE	MIR	MIRb
cg16514473	SINE	Alu	AluSz6
cg19273683	SINE	MIR	MIRb
cg02492946	LINE	L2	L2b
cg01946042	Simple_repeat	Simple_repeat	(CGGGG)n
cg02448922	Low_complexity	Low_complexity	GC_rich
cg23043218	SINE	Alu	AluJb
cg11739512	LINE	L1	L1ME3
cg03439646	LTR	ERVL-MaLR	MSTB1
cg00349071	LTR	ERVL-MaLR	MSTB1
cg00349071	LINE	L1	L1ME3
cg15827217	SINE	MIR	MIR3
cg09801687	Simple_repeat	Simple_repeat	(CAGAGA)n
cg23352747	Simple_repeat	Simple_repeat	(CAGAGA)n
cg26936593	Simple_repeat	Simple_repeat	(CAGAGA)n
cg13377965	SINE	MIR	MIRb
cg22681190	LTR	ERVL-MaLR	MLT1K
cg18789685	SINE	MIR	MIRb
cg22719004	SINE	MIR	MIRc
cg22943875	LINE	L1	L1ME3A
cg12062270	LINE	L1	L1ME3A
cg12047425	LINE	L1	L1ME3A
cg06346857	LINE	L1	L1ME3A
cg22506534	LINE	L1	L1ME3A
cg01037895	LINE	L2	L2c
cg08727996	DNA	hAT-Charlie	MER5A
cg04346228	LINE	L2	L2b
cg24001246	SINE	MIR	MIR
cg06993467	LINE	L2	L2b
cg18150885	Low_complexity	Low_complexity	GC_rich
cg01723876	SINE	MIR	MIR
cg14515812	SINE	MIR	MIR
cg10038867	SINE	MIR	MIR3
cg20288655	SINE	Alu	AluSp
cg05120085	SINE	MIR	MIR
cg01360093	Low_complexity	Low_complexity	GC_rich
cg17184245	SINE	MIR	MIRc
cg15726387	SINE	Alu	AluSz6
cg07420232	SINE	Alu	AluSz6
cg12748948	LINE	L1	L1MB5
cg01058602	SINE	Alu	AluSx
cg27585345	LINE	L2	L2a
cg02790379	SINE	MIR	MIRb
cg17456100	SINE	MIR	MIRb
cg13403586	Low_complexity	Low_complexity	GC_rich
cg03944375	LINE	L2	L2a
cg26685187	LINE	L1	L1MB3
cg13430401	SINE	Alu	AluYc
cg18274749	LTR	ERVL-MaLR	MLT1K
cg02117102	SINE	MIR	MIR
cg00768741	SINE	MIR	MIR
cg16054502	LINE	L1	L1ME2
cg15646763	Simple_repeat	Simple_repeat	(CCCCG)n
cg03902951	Simple_repeat	Simple_repeat	(CCCCG)n
cg27522078	SINE	MIR	MIRb
cg05305413	LINE	L2	L2b
cg15629893	LINE	L2	L2b
cg04210254	LINE	L2	L2b
cg10952925	SINE	MIR	MIRb
cg13430819	LINE	L2	L2b
cg17240885	SINE	Alu	AluSx1
cg03114585	SINE	Alu	AluSx1
cg01720742	SINE	Alu	AluSx1
cg25131452	SINE	MIR	MIRb
cg01421611	SINE	MIR	MIR
cg24033557	SINE	Alu	AluSx1
cg11572548	LTR	ERV1	LTR54
cg10895682	LINE	L1	L1MB8
cg05600023	SINE	MIR	MIR
cg12098183	LINE	L2	L2c
cg19403005	DNA	hAT-Charlie	MER5A
cg00356045	SINE	MIR	MIRb
cg03133269	Simple_repeat	Simple_repeat	(CGCGG)n
cg04562522	Low_complexity	Low_complexity	GC_rich
cg21297673	Low_complexity	Low_complexity	GC_rich
cg07180649	SINE	MIR	MIRc
cg25011003	SINE	MIR	MIRc
cg15582954	SINE	MIR	MIRc
cg06985259	DNA	hAT-Blackjack	MER94
cg15094668	SINE	MIR	MIR3
cg12225045	SINE	Alu	AluJr
cg21416706	LINE	CR1	L3b
cg18237398	LTR	ERVL-MaLR	MLT1H1
cg24579705	LTR	ERVL-MaLR	MSTB
cg06124876	LTR	ERVL-MaLR	MLT1D
cg00785192	SINE	MIR	MIRc
cg10579012	SINE	MIR	MIRc
cg25150960	LINE	L1	L1MB3
cg11196398	LINE	L2	L2a
cg02668903	SINE	MIR	MIRb
cg02484391	SINE	MIR	MIRb
cg18232871	Simple_repeat	Simple_repeat	(CGG)n
cg05062491	LINE	L1	L1MB3
cg01628425	SINE	MIR	MIRb
cg26811927	Simple_repeat	Simple_repeat	(TG)n
cg01486686	LINE	L2	L2a
cg06824294	LINE	L2	L2b
cg16138181	SINE	MIR	MIRb
cg20676350	LTR	ERV1	MER52A
cg13168221	LTR	ERV1	MER52A
cg08710757	SINE	Alu	AluJr
cg07109332	SINE	MIR	MIR
cg01773518	DNA	hAT-Charlie	MER102b
cg13486600	SINE	MIR	MIR
cg00383020	LINE	L2	L2c
cg05157541	SINE	MIR	MIRb
cg17276450	SINE	MIR	MIR
cg00323313	SINE	MIR	MIRb
cg20297544	DNA	hAT-Charlie	MER113
cg00966078	SINE	Alu	AluJo
cg22702922	SINE	MIR	MIRb
cg23232832	SINE	MIR	MIR
cg04233054	SINE	MIR	MIRb
cg13988448	SINE	Alu	AluSz6
cg18156963	LINE	L2	L2b
cg12412627	LINE	L2	L2c
cg20138922	LINE	L2	L2
cg21787873	LINE	L1	L1MD1
cg04005555	DNA	hAT-Charlie	MER5C
cg01960413	LINE	L1	HAL1
cg01718365	LINE	L2	L2c
cg25199552	LINE	L1	L1MB7
cg25002551	SINE	Alu	AluSp
cg06517521	LINE	L1	L1MA8
cg01439649	LTR	ERVL-MaLR	MLT1D
cg13792007	SINE	MIR	MIR3
cg13499468	Low_complexity	Low_complexity	GC_rich
cg17753666	Low_complexity	Low_complexity	GC_rich
cg13930080	Low_complexity	Low_complexity	GC_rich
cg25610515	SINE	Alu	AluJb
cg26051750	SINE	MIR	MIR3
cg25745244	SINE	Alu	AluSp
cg21536328	SINE	Alu	AluSp
cg15469171	LINE	L2	L2
cg26360612	SINE	MIR	MIRc
cg07106501	SINE	Alu	AluSx
cg05392323	DNA	hAT?	MamRep4096
cg18167160	SINE	Alu	AluSx1
cg16555909	SINE	MIR	MIRc
cg27183435	LINE	L1	L1ME1
cg12400807	SINE	Alu	AluY
cg26894297	SINE	Alu	AluJr
cg10805970	SINE	MIR	MIR3
cg11855842	SINE	MIR	MIRc
cg17023648	Low_complexity	Low_complexity	GC_rich
cg10708588	Low_complexity	Low_complexity	C-rich
cg05788332	Low_complexity	Low_complexity	C-rich
cg01829387	Low_complexity	Low_complexity	C-rich
cg00417419	Low_complexity	Low_complexity	C-rich
cg11155265	SINE	MIR	MIRb
cg24254937	SINE	MIR	MIRb
cg03386536	SINE	MIR	MIRb
cg22007047	SINE	MIR	MIRb
cg11580897	SINE	Alu	AluY
cg02690117	SINE	MIR	MIR3
cg09858862	SINE	MIR	MIR3
cg15689180	SINE	Alu	AluSp
cg26256901	SINE	MIR	MIRb
cg06933796	LINE	L2	L2c
cg00458949	SINE	MIR	MIRc
cg03139576	SINE	Alu	AluY
cg00616624	SINE	MIR	MIRc
cg00171783	SINE	Alu	AluSz6
cg18418928	DNA	TcMar?	MamRep137
cg20254273	SINE	MIR	MIR
cg16718162	SINE	Alu	AluSg7
cg22983885	SINE	MIR	MIRb
cg15470672	SINE	MIR	MIRb
cg04667458	SINE	MIR	MIR3
cg12689996	SINE	Alu	AluSx1
cg10498717	SINE	MIR	MIRb
cg06890502	SINE	MIR	MIR3
cg23245838	LINE	L2	L2b
cg11851169	LINE	L2	L2b
cg22232708	SINE	Alu	AluSx
cg05791411	LTR	ERV1	LTR1
cg15692032	SINE	Alu	AluJb
cg24792360	SINE	Alu	AluJb
cg21528040	SINE	Alu	AluJb
cg04160030	SINE	Alu	AluJb
cg05524740	SINE	MIR	MIRb
cg24452347	Low_complexity	Low_complexity	GC_rich
cg26404511	Low_complexity	Low_complexity	GC_rich
cg03611151	Low_complexity	Low_complexity	GC_rich
cg23287243	SINE	MIR	MIR
cg07595346	SINE	MIR	MIRb
cg26151675	SINE	MIR	MIRb
cg04989128	LINE	L2	L2b
cg13071508	SINE	MIR	MIR
cg05350850	LINE	L2	L2b
cg23076913	LINE	L2	L2b
cg15987211	SINE	MIR	MIR3
cg12768969	LTR	ERVL	LTR32
cg14284055	LTR	ERVL	LTR32
cg03614954	LTR	ERVL	LTR32
cg10842008	LTR	ERV1	LTR10D
cg08878372	LTR	ERV1	LTR10D
cg03470088	Low_complexity	Low_complexity	GC_rich
cg11337018	Low_complexity	Low_complexity	GC_rich
cg24435747	SINE	Alu	AluSx
cg09824926	LTR	ERVL-MaLR	MLT1A1
cg23806196	SINE	Alu	AluJb
cg13574848	LINE	L2	L2c
cg11851457	SINE	Alu	AluJo
cg09322349	LINE	L2	L2b
cg27298252	SINE	MIR	MIRc
cg24860886	SINE	MIR	MIRc
cg11709405	SINE	MIR	MIRb
cg12405265	SINE	MIR	MIRb
cg06606207	LTR	Gypsy	MamGypLTR1c
cg16058430	LINE	L1	L1ME1
cg00933788	SINE	Alu	AluSc8
cg06544731	SINE	Alu	AluJr4
cg06204665	DNA	hAT?	MamRep4096
cg08878005	SINE	MIR	MIRb
cg24399432	DNA	hAT-Charlie	MER5A
cg10386887	LTR	ERV1	LTR12E
cg16149247	LTR	ERV1	LTR12E
cg24089263	LTR	ERVL-MaLR	MLT1K
cg17854320	Low_complexity	Low_complexity	C-rich
cg26680644	SINE	MIR	MIRb
cg18875551	LINE	L2	L2a
cg09874213	LINE	L2	L2a
cg02978013	SINE	Alu	AluY
cg10982508	SINE	Alu	AluSq2
cg07191152	LINE	L2	L2a
cg12081359	SINE	Alu	AluSx
cg24466100	SINE	Alu	AluSz
cg03103023	LINE	L2	L2b
cg20682390	Other	Other	SVA_F
cg17456471	LINE	L2	L2a
cg04489851	SINE	Alu	AluSx
cg02818189	LINE	L1	L1MEg
cg21831028	SINE	Alu	AluSg
cg15711976	SINE	MIR	MIR3
cg01103597	LINE	L2	L2a
cg01104425	LINE	L2	L2a
cg19270505	Low_complexity	Low_complexity	GC_rich
cg16581179	SINE	MIR	MIR
cg06156260	LINE	L2	L2c
cg03603018	SINE	MIR	MIRb
cg17973115	LINE	L2	L2c
cg22169866	SINE	MIR	MIR
cg13894747	Simple_repeat	Simple_repeat	(CA)n
cg20692268	DNA	TcMar-Tigger	Tigger13a
cg24488469	DNA	hAT-Charlie	MER5A
cg04137530	LTR	ERVK	LTR22B
cg00581617	LTR	ERV1	MER90a
cg09761863	LTR	ERV1	LTR8A
cg11518020	LTR	ERV1	LTR8A
cg14516704	LTR	ERV1	LTR8A
cg17651255	LTR	ERV1	LTR8A
cg18160614	SINE	Alu	AluJr4
cg26890309	SINE	Alu	AluSg
cg04092685	SINE	Alu	AluSg
cg22339688	SINE	Alu	AluSx3
cg20017683	SINE	MIR	MIRb
cg17987483	LTR	ERVL-MaLR	THE1B
cg26216857	SINE	Alu	AluJb
cg23615467	SINE	MIR	MIRc
cg04063547	SINE	MIR	MIRc
cg13795696	SINE	Alu	AluY
cg08035105	SINE	MIR	MIRb
cg09264742	Simple_repeat	Simple_repeat	(CGG)n
cg06395634	SINE	MIR	MIR3
cg25209353	DNA	hAT-Charlie	MER30
cg10176185	SINE	MIR	MIRb
cg03329148	Simple_repeat	Simple_repeat	(TG)n
cg14252211	LINE	L2	L2b
cg26890920	LTR	ERV1	MER52A
cg20464072	LTR	ERV1	MER52A
cg00832850	LTR	ERV1	MER52A
cg08246520	LTR	ERV1	MER52A
cg00653744	LTR	ERV1	MER52A
cg09254142	LTR	ERV1	MER52A
cg08460387	SINE	MIR	MIRc
cg22125902	DNA	hAT-Charlie	MER5A1
cg08948442	LINE	L1	L1ME4a
cg02586949	SINE	Alu	AluSq
cg12178432	LINE	L1	HAL1
cg11217953	LINE	L2	L2c
cg13937012	SINE	MIR	MIRb
cg18347602	SINE	MIR	MIRb
cg07357075	SINE	Alu	AluSq2
cg07574241	Low_complexity	Low_complexity	G-rich
cg20787693	LINE	L2	L2c
cg15979146	SINE	Alu	AluSc
cg20302420	Low_complexity	Low_complexity	GC_rich
cg00224299	Low_complexity	Low_complexity	GC_rich
cg01909024	SINE	Alu	AluSc
cg23799313	LINE	L2	L2c
cg18128212	SINE	Alu	AluJb
cg21784781	SINE	Alu	AluSc
cg00454997	DNA	hAT-Charlie	MER102b
cg15527491	SINE	Alu	AluSx1
cg18114887	LTR	ERV1	MER66A
cg01236573	SINE	MIR	MIR3
cg20140908	SINE	Alu	AluJo
cg22019970	LINE	L2	L2b
cg06521299	LINE	L2	L2b
cg01948083	SINE	Alu	AluSc
cg01727646	LTR	ERVL	MER74A
cg18212039	SINE	MIR	MIR
cg21950720	LINE	L2	L2b
cg13783323	LINE	L2	L2b
cg06161375	LINE	L2	L2c
cg09474010	LTR	ERV1	LTR8
cg17753661	SINE	MIR	MIRb
cg19378729	SINE	MIR	MIRb
cg16680237	SINE	MIR	MIRc
cg23689304	SINE	MIR	MIRc
cg22860775	SINE	MIR	MIR3
cg26543657	SINE	MIR	MIRb
cg18107827	SINE	MIR	MIRb
cg07916101	Low_complexity	Low_complexity	G-rich
cg20152413	LINE	CR1	L3
cg25229964	SINE	MIR	MIR
cg13553204	LINE	L2	L2b
cg15841378	SINE	Alu	AluJr
cg11674508	SINE	Alu	AluSz6
cg02576637	LINE	L2	L2c
cg23895234	DNA	hAT-Charlie	MER20
cg16363874	SINE	Alu	AluSx1
cg23590159	SINE	Alu	AluSq2
cg06376214	SINE	MIR	MIRb
cg03724759	SINE	MIR	MIRb
cg00910861	SINE	Alu	AluSc
cg19777853	SINE	MIR	MIRb
cg12269498	SINE	Alu	AluSx3
cg08572767	SINE	MIR	MIRb
cg00387941	SINE	Alu	AluSp
cg25368667	SINE	MIR	MIRc
cg10705251	SINE	Alu	AluSz
cg15118519	SINE	Alu	AluSz
cg10238587	SINE	Alu	AluSq2
cg24410607	SINE	Alu	AluJb
cg14164839	LTR	ERVL	LTR16A
cg00539094	LINE	L1	HAL1
cg09895909	SINE	Alu	AluSp
cg19321725	SINE	Alu	AluY
cg12729822	SINE	Alu	AluJo
cg08034986	SINE	MIR	MIRc
cg09231555	SINE	Alu	AluY
cg23955417	SINE	MIR	MIR
cg00256632	SINE	MIR	MIR3
cg26919417	SINE	Alu	AluSz
cg10706206	LINE	CR1	L3
cg08235557	SINE	Alu	AluSq
cg23721345	DNA	hAT-Charlie	MER20B
cg00759987	LINE	L2	L2a
cg26917125	LTR	ERVL-MaLR	MLT1B
cg15497006	SINE	Alu	FAM
cg08535184	LTR	ERVL-MaLR	MLT1E1A
cg02657830	LINE	L2	L2a
cg22489549	SINE	Alu	AluY
cg05391643	SINE	Alu	AluSp
cg05549769	SINE	MIR	MIRb
cg05549769	SINE	MIR	MIR
cg03952248	LINE	L1	L1M5
cg16991868	LINE	L1	L1M5
cg17796198	SINE	Alu	AluSx
cg07725198	SINE	Alu	AluJo
cg25614889	DNA	hAT-Tip100	MER45A
cg21438558	SINE	Alu	AluSz
cg02127418	LINE	L2	L2a
cg17799601	SINE	MIR	MIRb
cg21921474	LINE	L2	L2b
cg19125999	LINE	L2	L2b
cg23609650	SINE	Alu	AluSx3
cg17029721	SINE	MIR	MIRb
cg24943329	SINE	MIR	MIR3
cg12699080	Low_complexity	Low_complexity	GC_rich
cg06544141	Low_complexity	Low_complexity	C-rich
cg25100848	Low_complexity	Low_complexity	GC_rich
cg10489986	Low_complexity	Low_complexity	GC_rich
cg23922819	SINE	Alu	AluJo
cg09257349	SINE	MIR	MIR3
cg00723277	SINE	MIR	MIRb
cg10635686	SINE	Alu	AluSx
cg04249191	LTR	Gypsy?	LTR85a
cg17416231	Other	Other	SVA_E
cg26313337	SINE	MIR	MIR3
cg05778820	LINE	L2	L2c
cg04056678	Simple_repeat	Simple_repeat	(CCCCAG)n
cg23035238	SINE	Alu	AluJr
cg03117544	SINE	Alu	AluSx
cg12211100	LINE	L1	L1MCc
cg23227697	SINE	Alu	AluSx
cg07357033	LTR	ERVL-MaLR	MLT1G1
cg03059896	SINE	MIR	MIR
cg12697689	SINE	Alu	AluSc8
cg14162906	SINE	MIR	MIR3
cg09766323	SINE	MIR	MIRb
cg02052894	SINE	Alu	AluSx1
cg00310404	LINE	L2	L2b
cg20775044	SINE	Alu	AluSx
cg16400794	Simple_repeat	Simple_repeat	(CGGGG)n
cg04910690	Simple_repeat	Simple_repeat	(CGGGG)n
cg00286621	Simple_repeat	Simple_repeat	(CGGGG)n
cg22872989	Simple_repeat	Simple_repeat	(CGGGG)n
cg01765529	Simple_repeat	Simple_repeat	(CGGGG)n
cg20165381	Simple_repeat	Simple_repeat	(CGGGG)n
cg19370166	Simple_repeat	Simple_repeat	(CGGGG)n
cg09473455	SINE	MIR	MIRb
cg06323521	SINE	MIR	MIRb
cg16706220	LINE	L2	L2c
cg05002165	SINE	Alu	AluSx
cg19784449	Low_complexity	Low_complexity	GC_rich
cg26894259	SINE	MIR	MIRb
cg08915615	SINE	MIR	MIRb
cg24162579	SINE	Alu	AluSp
cg15694146	Simple_repeat	Simple_repeat	(TC)n
cg07742396	SINE	Alu	AluSc8
cg13920090	SINE	MIR	MIR3
cg23613162	SINE	MIR	MIR3
cg15072832	SINE	MIR	MIR3
cg19768125	SINE	MIR	MIR3
cg11364364	Low_complexity	Low_complexity	CT-rich
cg03018771	SINE	MIR	MIR
cg25186909	SINE	Alu	AluSg4
cg22402398	SINE	MIR	MIR
cg06438114	SINE	Alu	AluSq2
cg00404394	SINE	Alu	AluJr
cg16897005	SINE	Alu	AluJo
cg19249583	SINE	Alu	AluY
cg22237495	LINE	L2	L2c
cg01519733	Simple_repeat	Simple_repeat	(CA)n
cg02238461	SINE	MIR	MIRc
cg17602903	SINE	MIR	MIR3
cg22224989	Simple_repeat	Simple_repeat	(CCG)n
cg09664554	SINE	Alu	AluSx
cg01911529	SINE	MIR	MIR
cg08237898	LTR	ERVL	ERVL-E-int
cg06352483	Low_complexity	Low_complexity	GC_rich
cg20288752	SINE	Alu	AluJb
cg00116686	SINE	Alu	AluJb
cg23166246	SINE	Alu	AluSp
cg26106720	LINE	L1	L1ME1
cg26411822	SINE	MIR	MIRb
cg08857906	SINE	Alu	AluSz
cg15707455	SINE	Alu	AluSz
cg15626873	SINE	Alu	AluY
cg06875162	SINE	MIR	MIRb
cg27565366	Simple_repeat	Simple_repeat	(CGGGG)n
cg06936079	Simple_repeat	Simple_repeat	(CGGGG)n
cg00856002	Simple_repeat	Simple_repeat	(CGGGG)n
cg23206761	SINE	MIR	MIR
cg23691781	LINE	L2	L2c
cg24604179	SINE	Alu	AluJr
cg09154794	SINE	MIR	MIR
cg25410668	LINE	CR1	L3
cg00292669	LINE	CR1	L3
cg09131903	LINE	L1	L1MB3
cg10242775	SINE	Alu	AluJr
cg22421699	LINE	L2	L2c
cg03599257	LINE	L2	L2a
cg03700669	LINE	L2	L2a
cg25107788	SINE	Alu	AluSz6
cg03439065	srpRNA	srpRNA	7SLRNA
cg08452964	LTR	ERVL	MER74B
cg24509398	SINE	Alu	AluJo
cg14378564	LINE	L2	L2a
cg07844563	SINE	Alu	AluJr
cg03765260	SINE	Alu	AluJr
cg17037018	LINE	L2	L2a
cg20945221	LTR	ERVL	LTR67B
cg16411683	SINE	Alu	AluSz6
cg20486986	SINE	MIR	MIRb
cg19166242	SINE	Alu	AluY
cg21680474	SINE	Alu	AluY
cg04167126	SINE	Alu	AluJb
cg24354652	SINE	Alu	AluJb
cg20460771	SINE	MIR	MIRb
cg08652654	SINE	Alu	FLAM_C
cg09822291	SINE	Alu	AluJb
cg00546808	SINE	Alu	AluSc5
cg03040423	SINE	Alu	AluSg
cg00033102	SINE	Alu	AluSx
cg23394462	SINE	Alu	AluSc8
cg02251754	SINE	Alu	AluSx
cg04993605	LINE	L1	L1MC4a
cg00955039	SINE	Alu	AluSp
cg13577188	SINE	Alu	AluJr4
cg00017546	LINE	L2	L2a
cg26933136	SINE	Alu	AluSg
cg11072045	SINE	Alu	AluSx
cg13784878	SINE	Alu	AluSx1
cg20985980	SINE	Alu	AluSz6
cg23912171	SINE	Alu	AluSz6
cg24469114	SINE	Alu	AluSx
cg16013618	SINE	Alu	AluSg
cg12057368	SINE	Alu	AluSq2
cg02732067	snRNA	snRNA	U13
cg00261690	LINE	L1	L1ME4a
cg25630265	SINE	MIR	MIRc
cg23682641	SINE	Alu	AluSc8
cg06089829	SINE	Alu	AluY
cg26105310	LTR	ERV1	LTR35A
cg15719025	SINE	Alu	AluSc
cg07398558	SINE	Alu	AluSc
cg07033395	SINE	Alu	AluSx1
cg11573859	SINE	MIR	MIRb
cg02772605	SINE	Alu	AluSc8
cg08450168	SINE	MIR	MIRc
cg03287108	LINE	L2	L2b
cg02454560	SINE	Alu	AluJb
cg20152731	SINE	MIR	MIR3
cg24327491	SINE	Alu	AluSx1
[truncated: 75,200 more rows]
