# Supplementary material for: Expression of most retrotransposons in human blood correlates with biological aging
Source: eLife. 2024 Oct 17;13:RP96575. doi: 10.7554/eLife.96575 (PMC11486490; doi:10.7554/eLife.96575)
Supplement: Supplementary file 6. [file elife-96575-supp6.xlsx]

## Sheet: Sheet1
Data Source	Sample Type	Primary Ancestry	Doner Description	Age Range	Platform	Sample Size
Comprehensive Profiling of an Aging Immune System Reveals Clonal GZMK+ CD8+ T Cells as Conserved Hallmark of Inflammaging	PBMCs	Caucasian	Healthy, non-obese, aged & young male individuals	62-70 & 25-29	10x Genomics	21
Single-cell transcriptomics reveals expansion of cytotoxic CD4 T cells in supercentenarians	PBMCs	Japanese	Supercentenarians & normal aged indoviduals	110s & 50s-80s	10x Genomics	12
