# Supplementary material for: Expression of most retrotransposons in human blood correlates with biological aging
Source: eLife. 2024 Oct 17;13:RP96575. doi: 10.7554/eLife.96575 (PMC11486490; doi:10.7554/eLife.96575)
Supplement: Supplementary file 7. [file elife-96575-supp7.xlsx]

## Sheet: Sheet1
Ivashkiv et al., 2014	Troiani et al., 2022	Danaher et al., 2017 & 2018	Franceschi et al., 2014	Mogilenko et al., 2022	Hudgins et al., 2018
IFN-I	Senescence	Inflammatory chemokines	Inflammaging	Inflammatory cytokines	SASP
IFNA13	CDKN1A	CCL2	IL6	IL6	IL6
IFNB1	CDKN2A	CCL3L1	TNF	IFNB1	IL1A
OAS1	CDKN1B	CCL4	IL1A	IL1B	IL1B
IFNAR1	CDKN2B	CCL7	IL1B	IL1A	TIMP1
IFNAR2	CDKN2D	CCL8	IL1RN		MMP3
JAK1	SERPINE1		IL8		MMP12
TYK2					CXCL1
STAT1					CXCL2
STAT2					CCL8
IRF9
PTK2
MX1
