# Supplementary material for: Expression of most retrotransposons in human blood correlates with biological aging
Source: eLife. 2024 Oct 17;13:RP96575. doi: 10.7554/eLife.96575 (PMC11486490; doi:10.7554/eLife.96575)
Supplement: Supplementary file 8. [file elife-96575-supp8.xlsx]

## Sheet: Sheet1
Gene lists	Missing Genes
Inflammatory chemokines	CCL3L1,CCL4,CCL7
IFN-I	IFNB1
Senescence	CDKN2A
Inflammaging	IL1A
Inflammatory cytokines	IFNB1,IL1A
SASP	IL1A,MMP3,MMP12,CXCL2
